# Supplementary material
Source: PubMed Central journal article supplement (PMC2675737)
Supplement: pp.108.134353_2.pdf [file pp.108.134353_2.pdf]

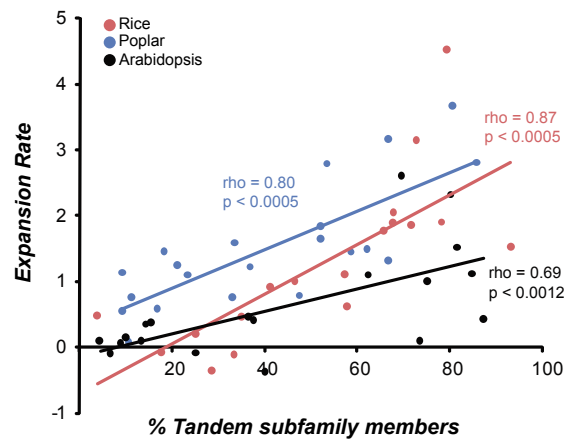

**Supplemental Figure S2. Relationship between tandem duplication and expansion rate.** Subfamily expansion rate was plotted against the percentage of subfamily members in tandem clusters (where % tandem > 0) for each species: Arabidopsis, black; poplar, blue; rice, pink. The best-fit lines, Spearman's  $\rho$ , and the p values for the significance of the correlation are shown.
