# Supplementary material
Source: PubMed Central journal article supplement (PMC2675737)
Supplement: pp.108.134353_3.pdf [file pp.108.134353_3.pdf]

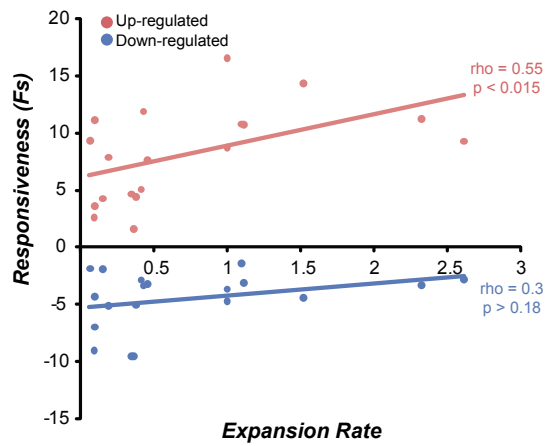

**Supplemental Figure S3. Relationship between subfamily stress responsiveness ( $F_s$ ) and expansion rate.**

Subfamily stress responsiveness ( $F_s$ ) as described in the text was plotted against expansion rate of subfamilies whose expansion rate is  $>0$ . Responsiveness for up-regulated and down-regulated genes are shown by pink and blue circles, respectively. The best-fit lines, Spearman's  $\rho$ , and the p values for the significance of the correlation are shown.
