# Supplementary material
Source: PubMed Central journal article supplement (PMC2675737)
Supplement: pp.108.134353_4.pdf [file pp.108.134353_4.pdf]

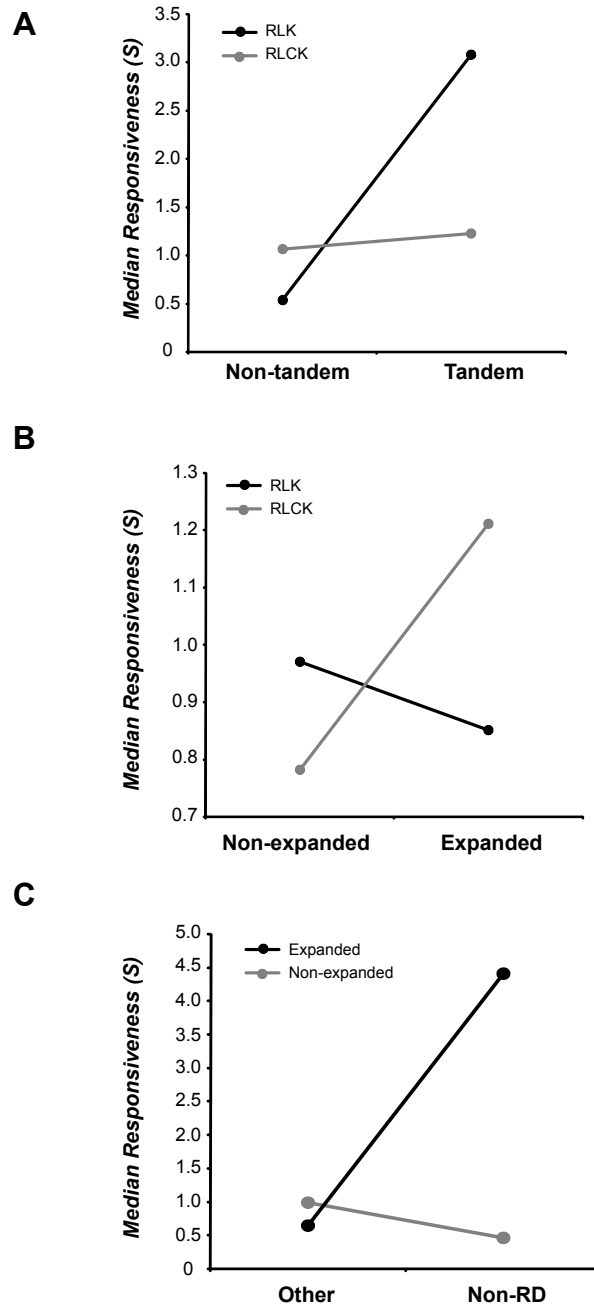

**Figure 6. Plots illustrating interaction effects determined by multiple regression.**

A) Median biotic stress responsiveness (*S*- see **Materials and Methods**) is plotted for tandem and non-tandem RLKs (black circles) and RLCKs (gray circles). B) Median *S* is plotted for expanded and non-expanded RLKs (black circles) and RLCKs (gray circles). C) Median *S* is plotted for non-RD and other kinases belonging to expanded (black circles) and non-expanded (gray circles) subfamilies.
