# Supplementary material
Source: PubMed Central journal article supplement (PMC2675737)
Supplement: pp.108.134353_7.pdf [file pp.108.134353_7.pdf]

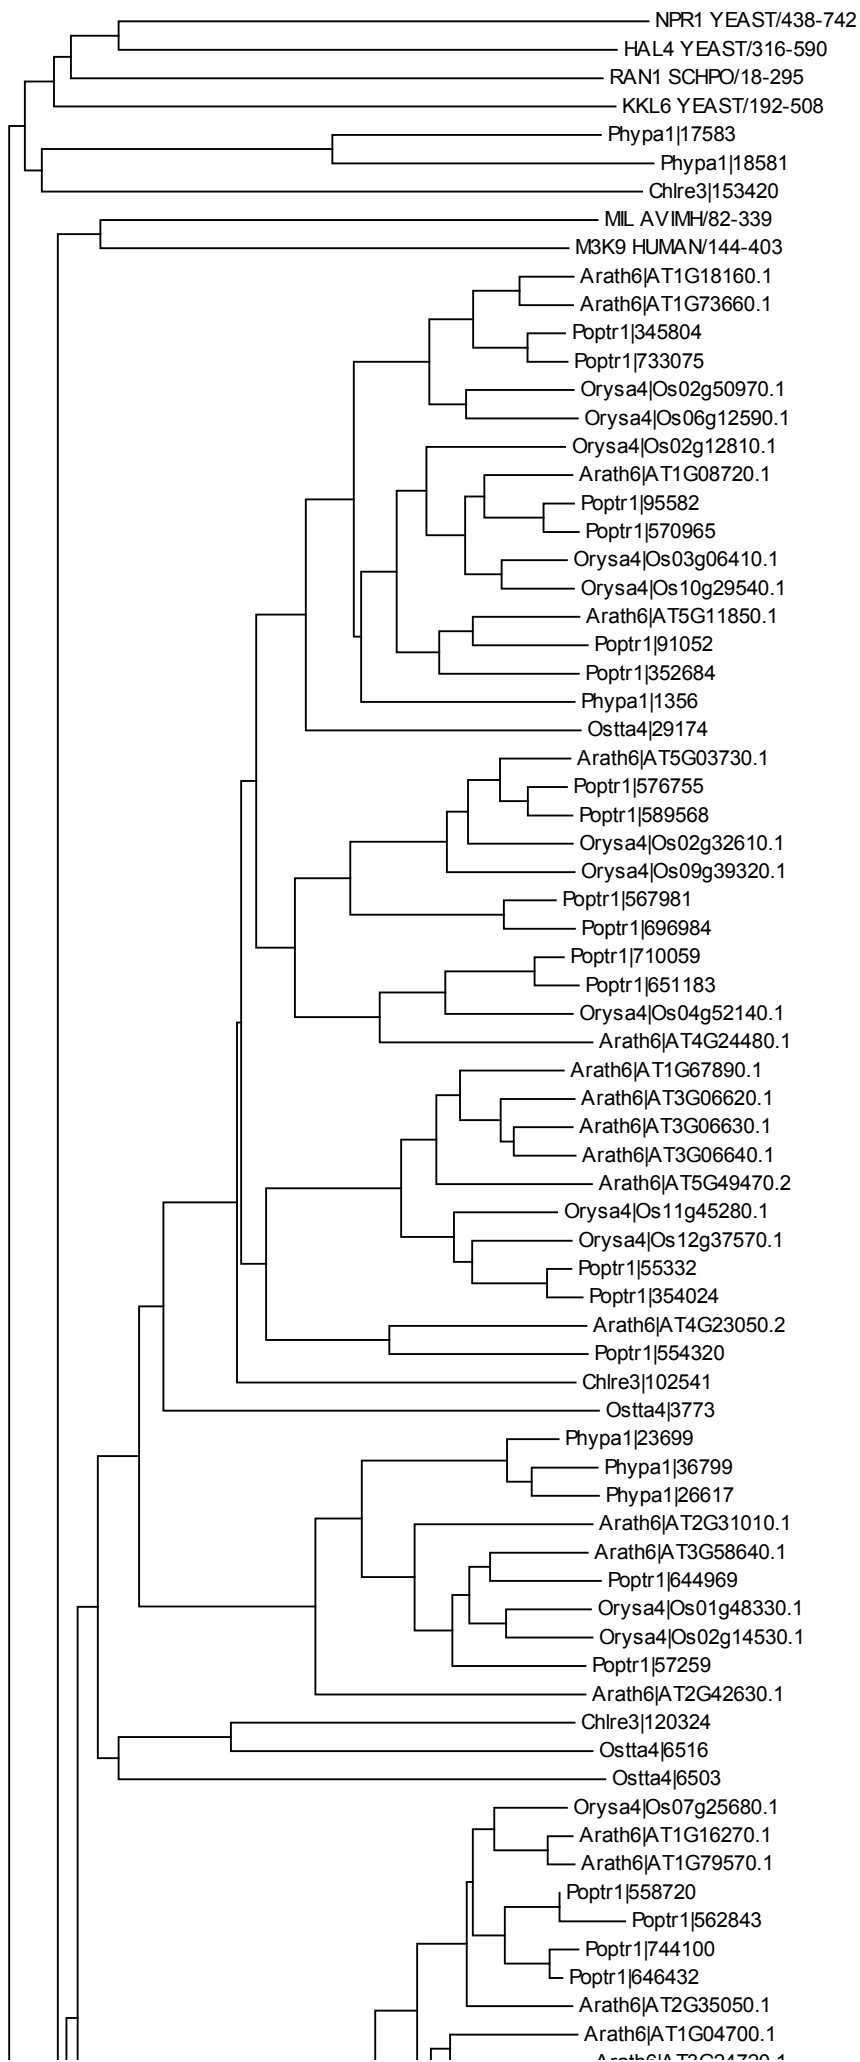

**Supplemental Figure S7.** Phylogeny of protein kinases from Arabidopsis, rice, poplar, moss, *C. reinhardtii*, and *O. tauri*.

This phylogenetic tree based on kinase domain sequences was constructed using the Neighbor Joining method. Gene names start with Arath6, Poptr1, Orysa4, Poptr1, Phypa1, or Ostta4, which indicates the species and genome version. This is followed by the gene number. Also included are representative kinases from other organisms.

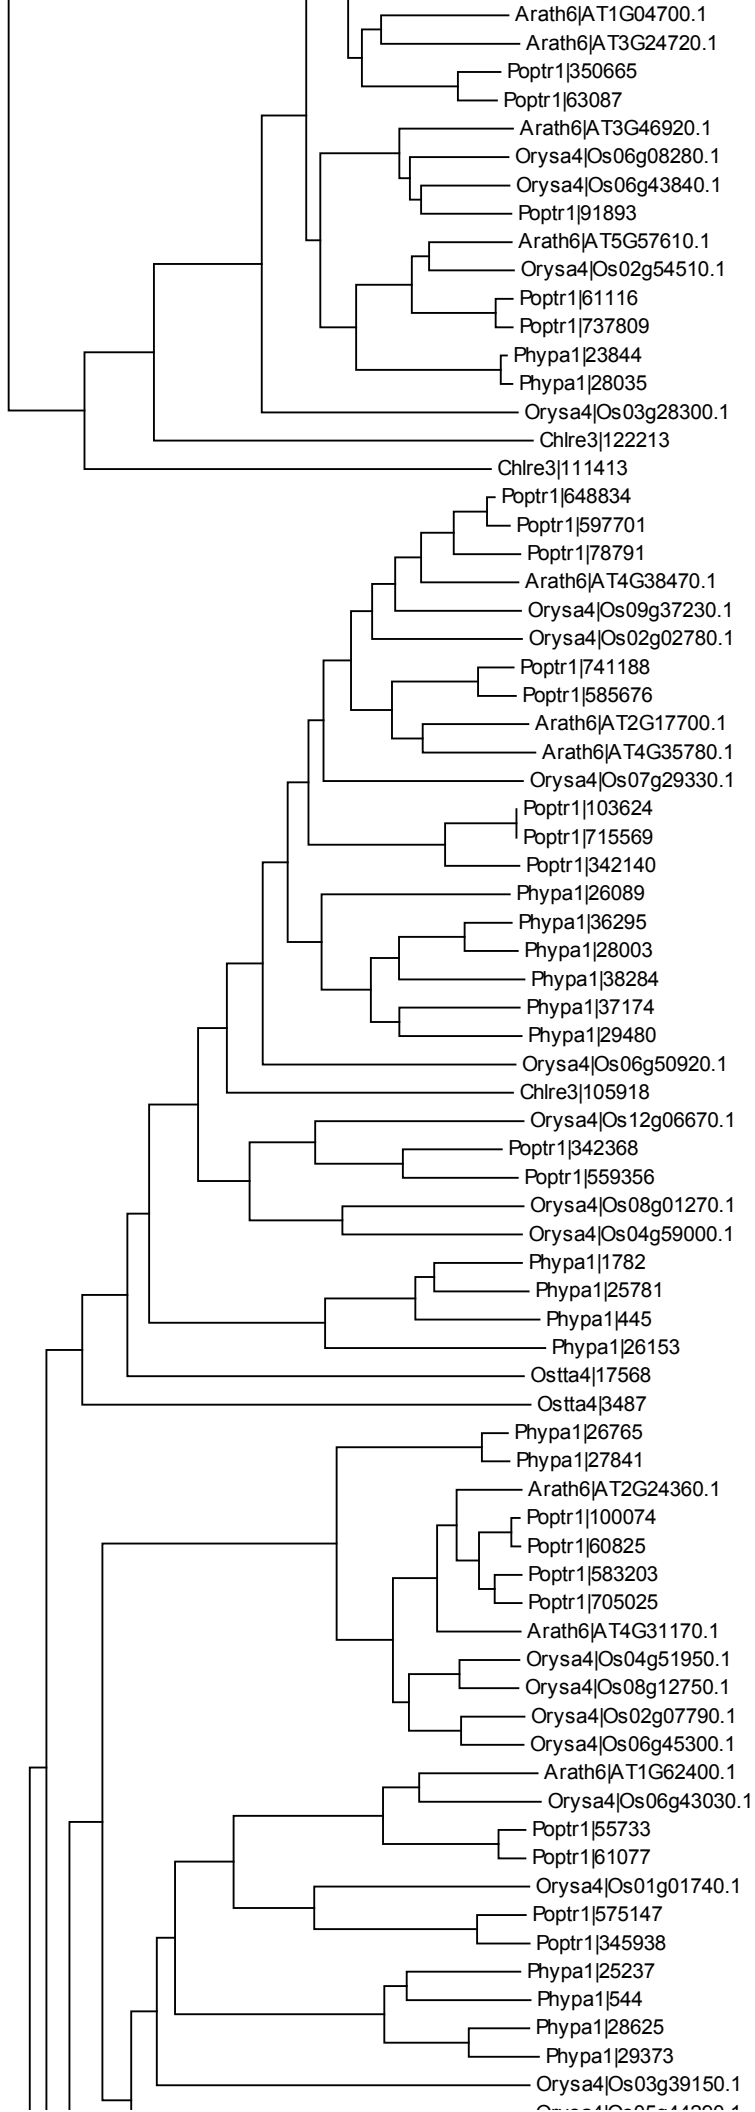

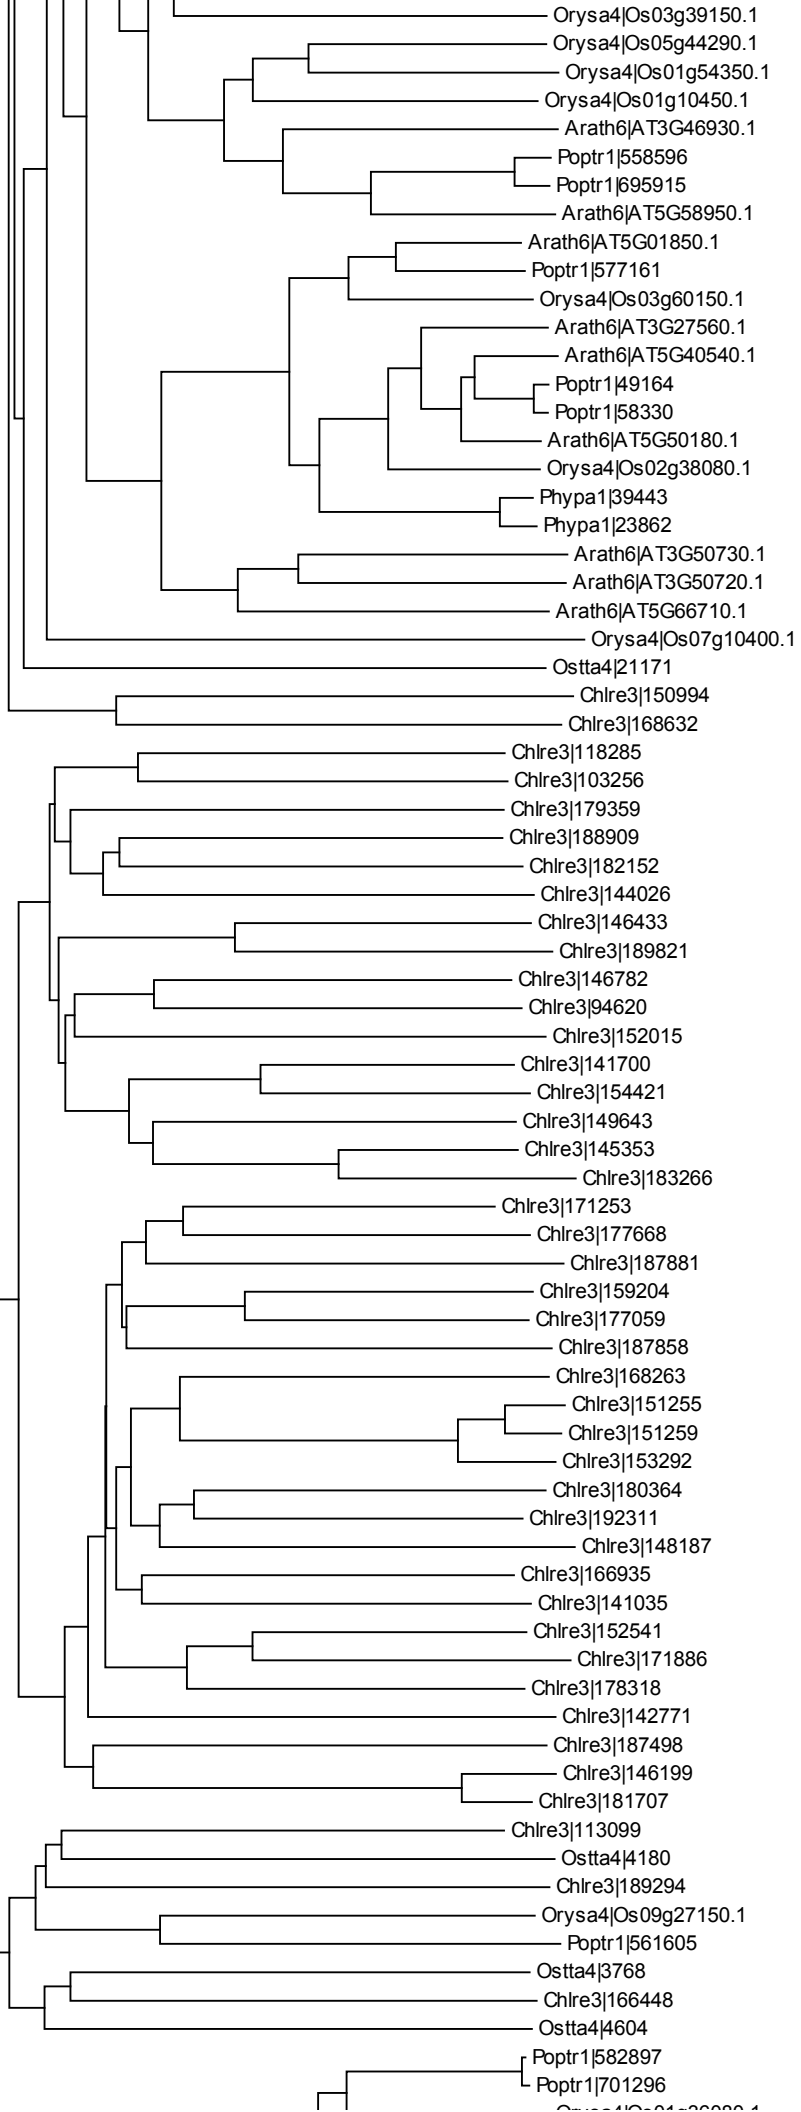

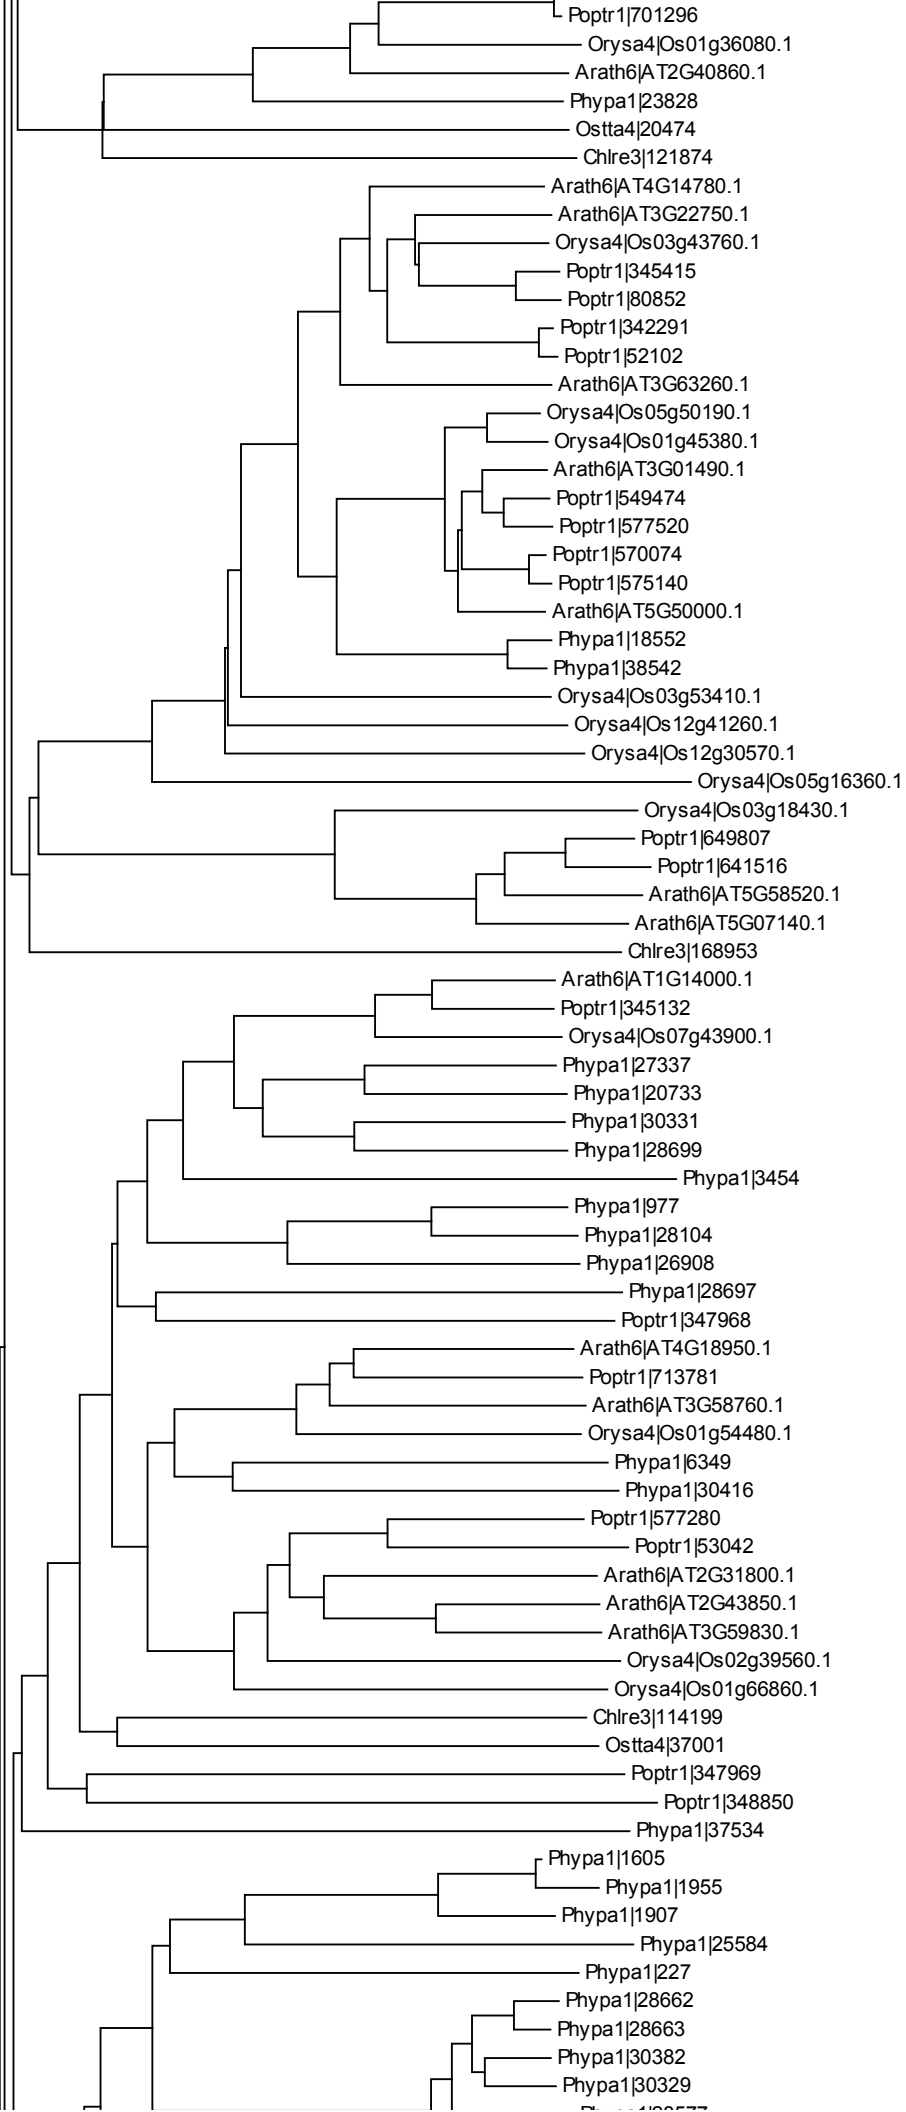

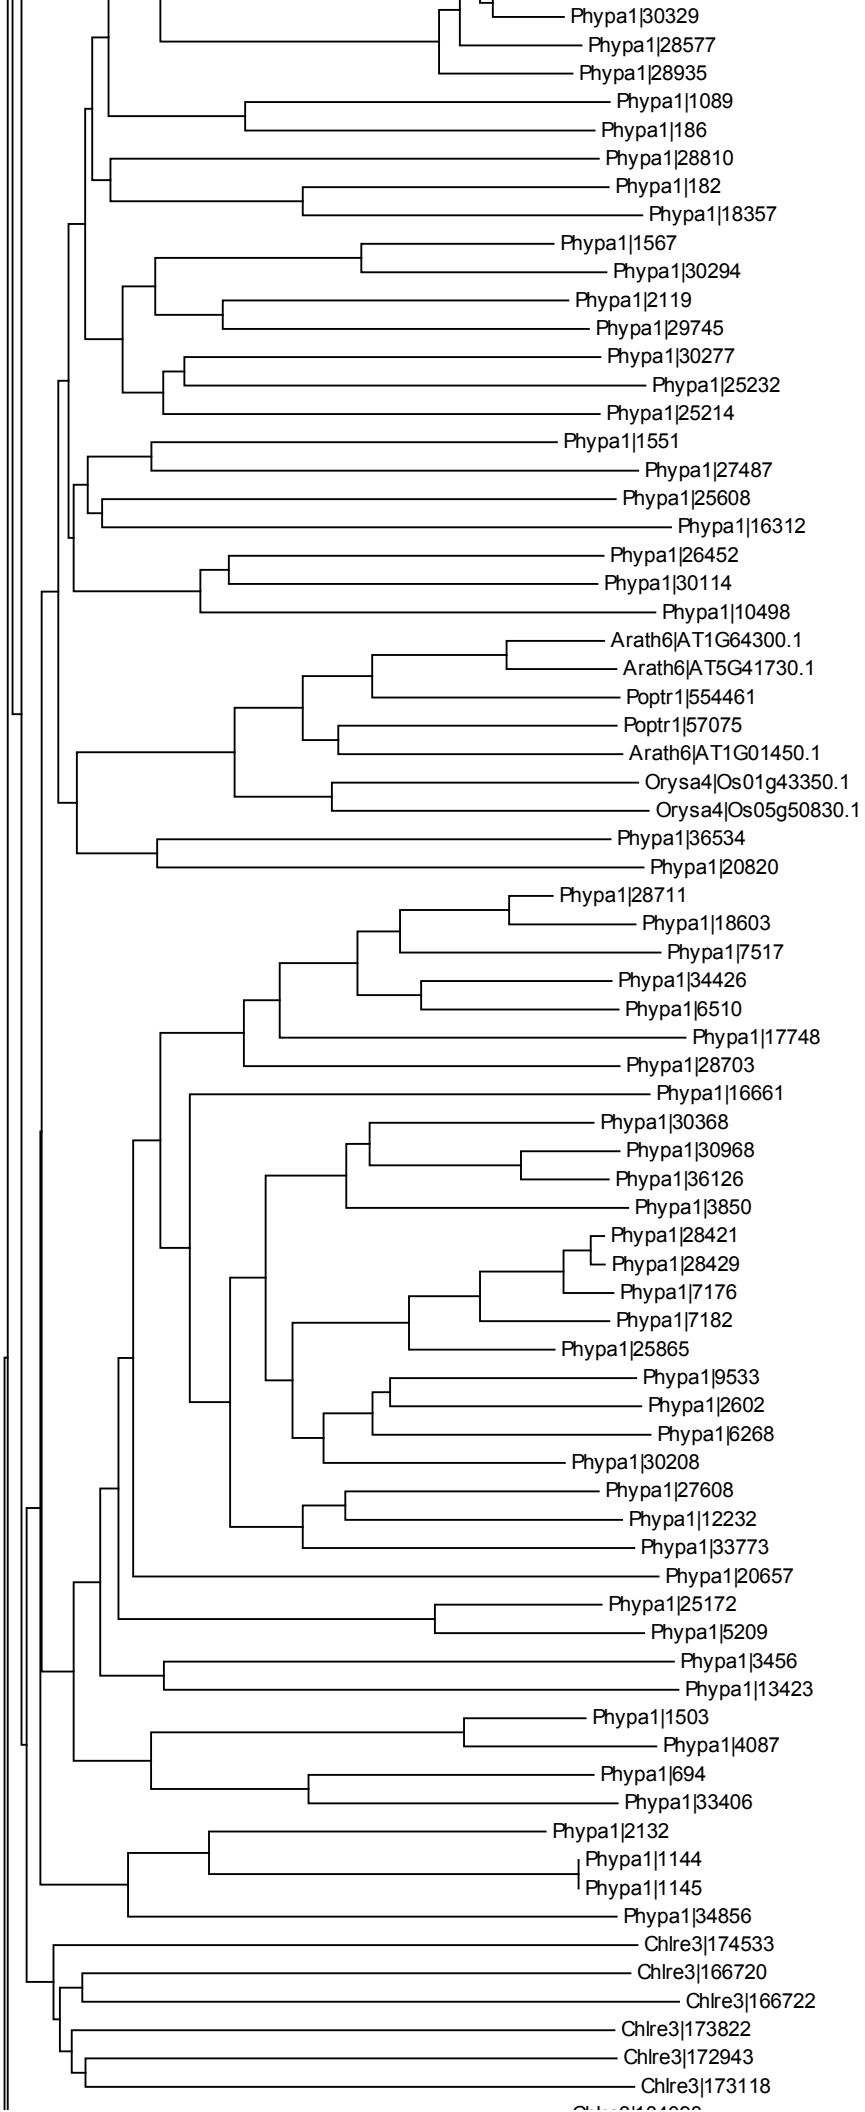

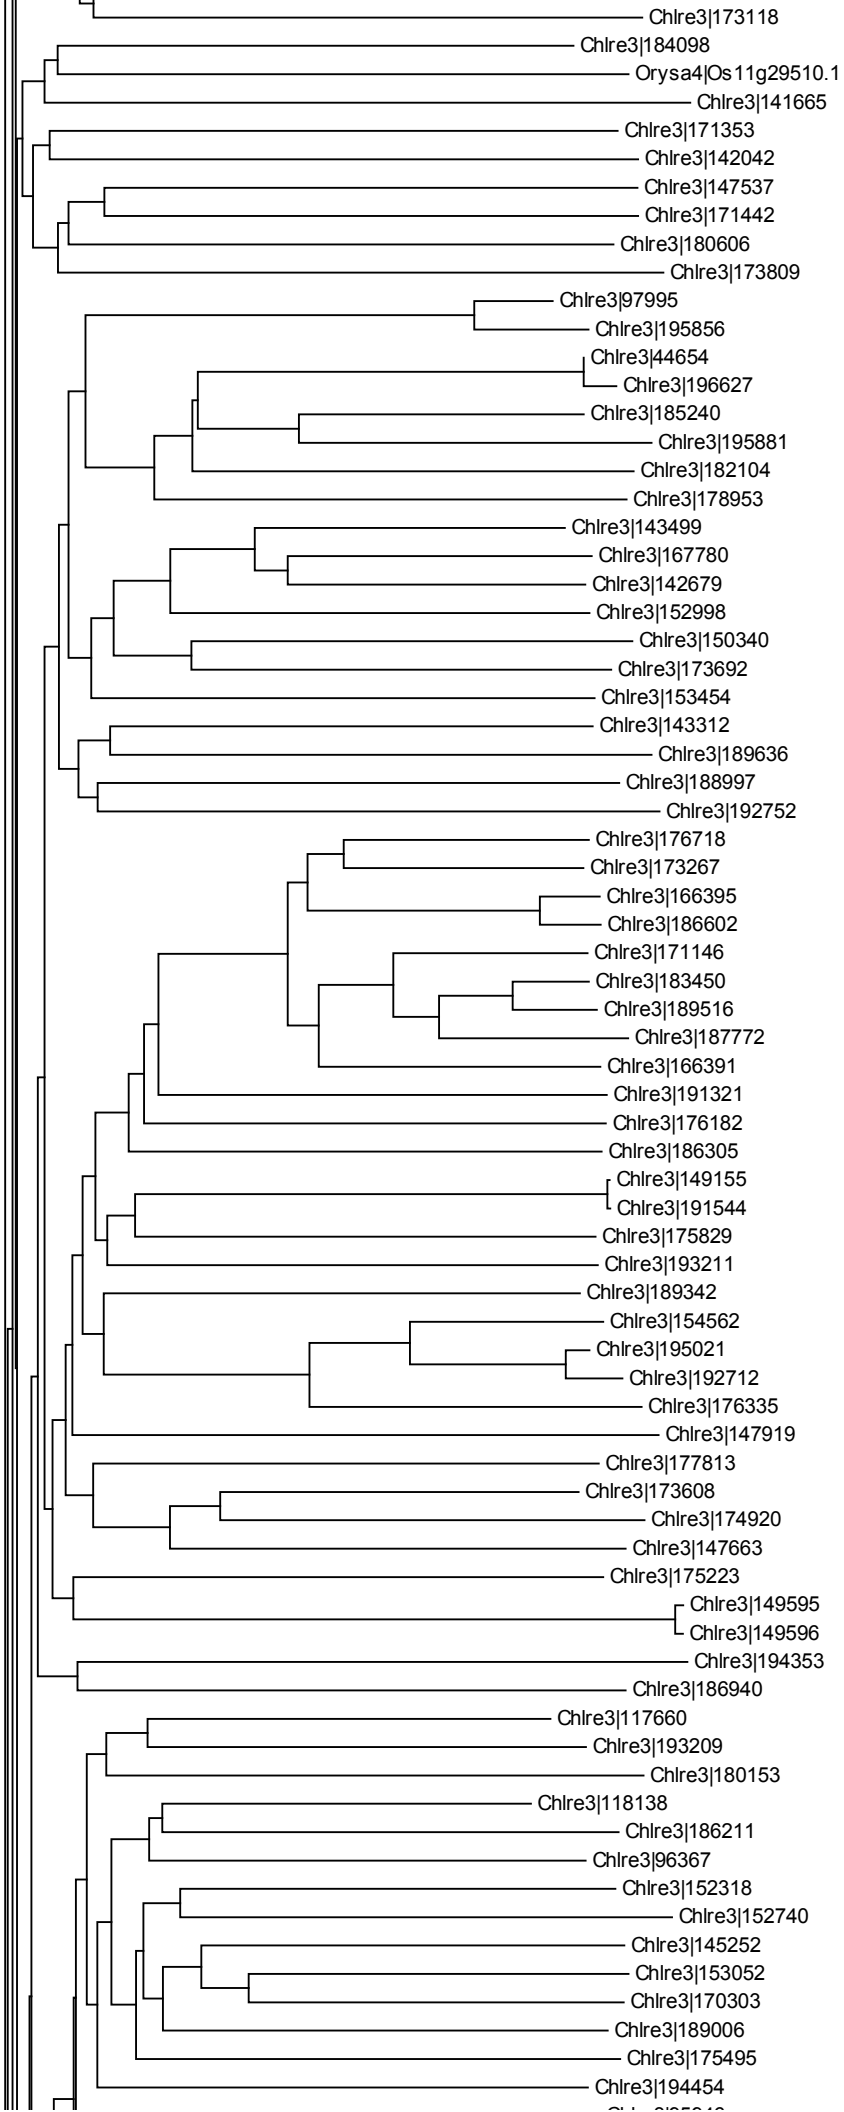

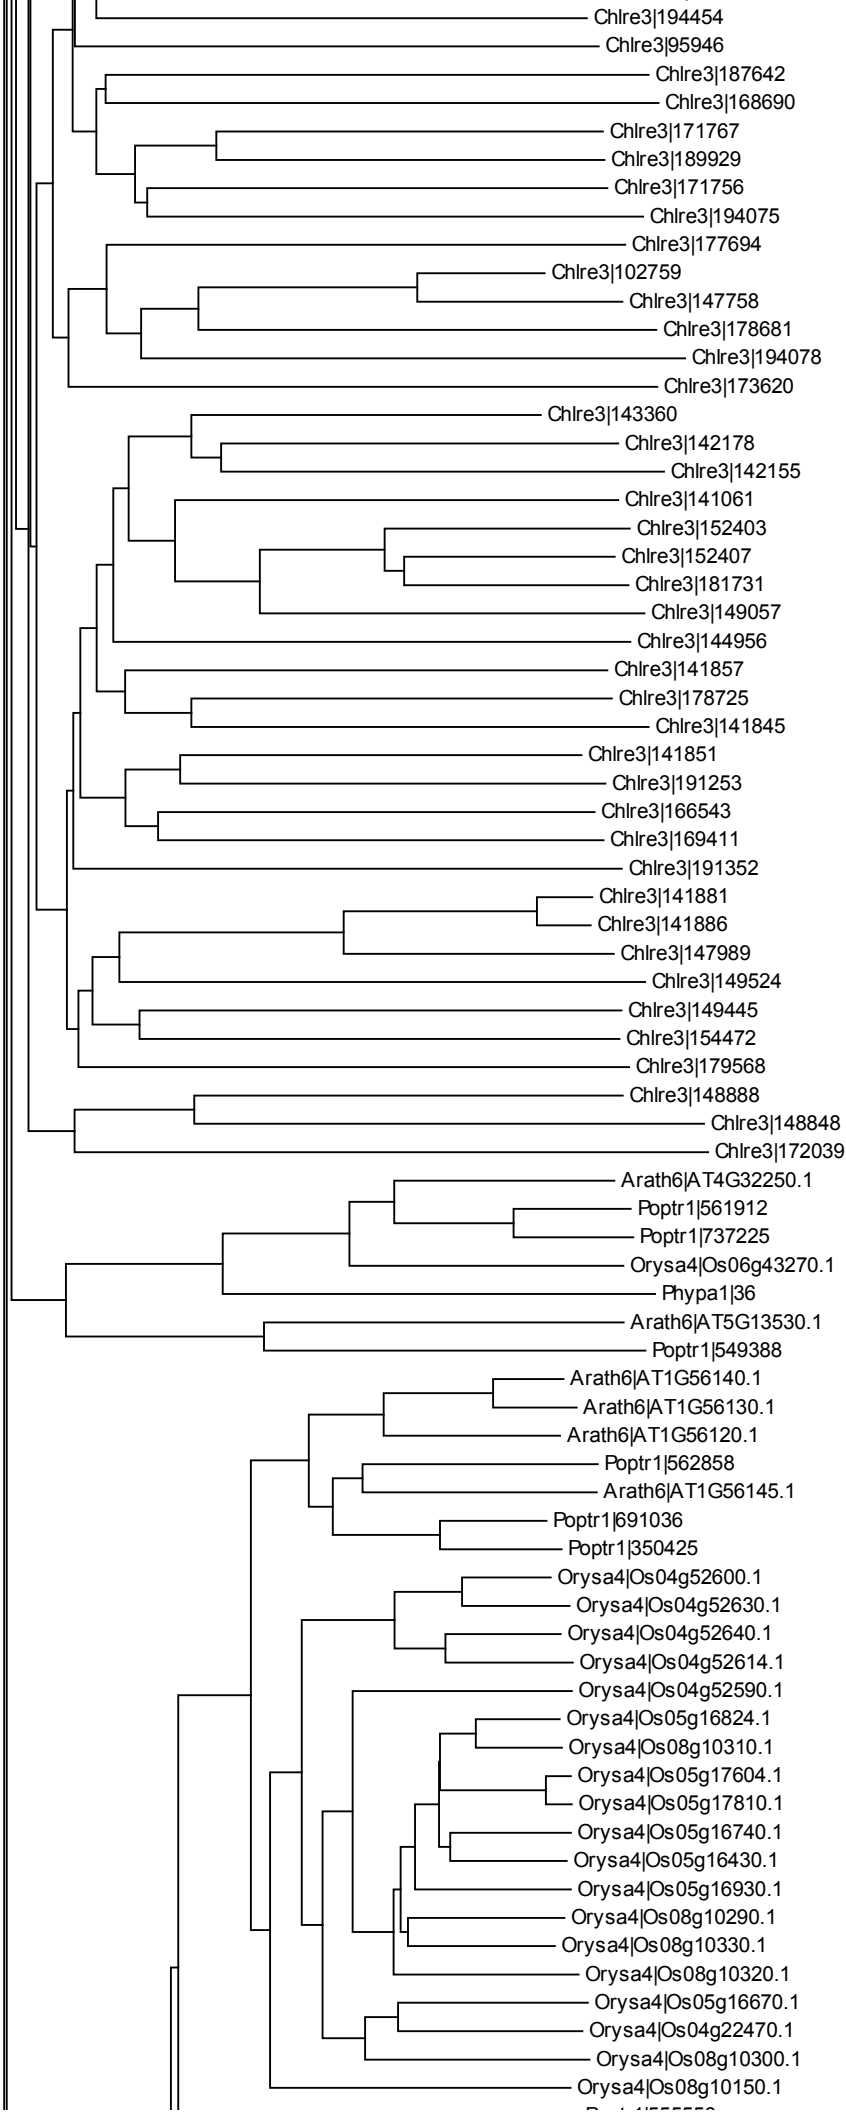

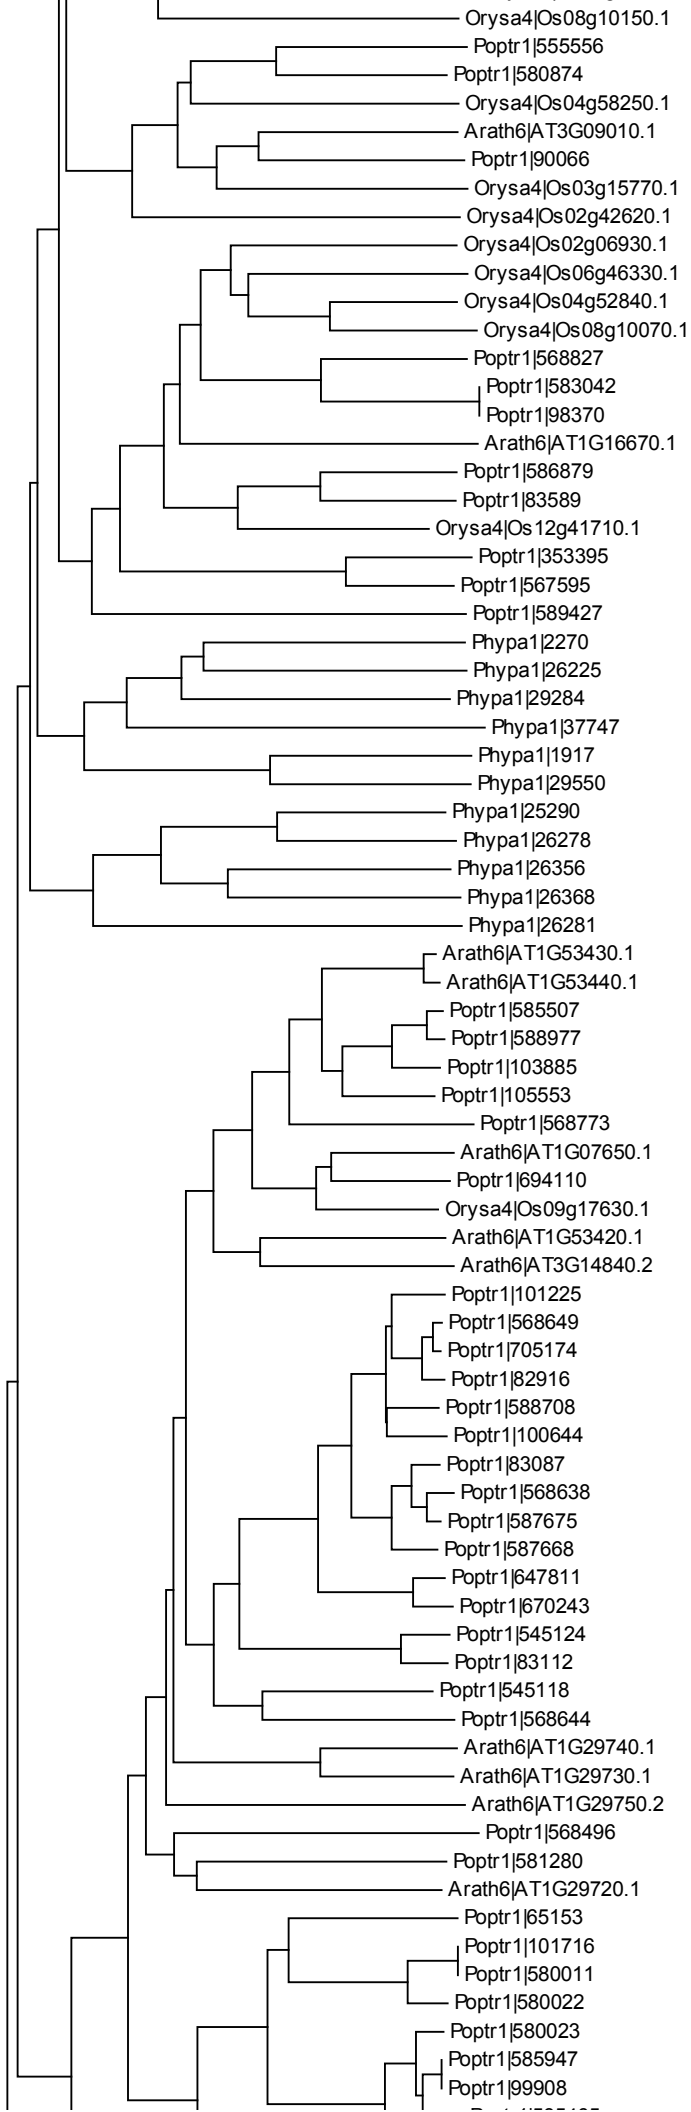



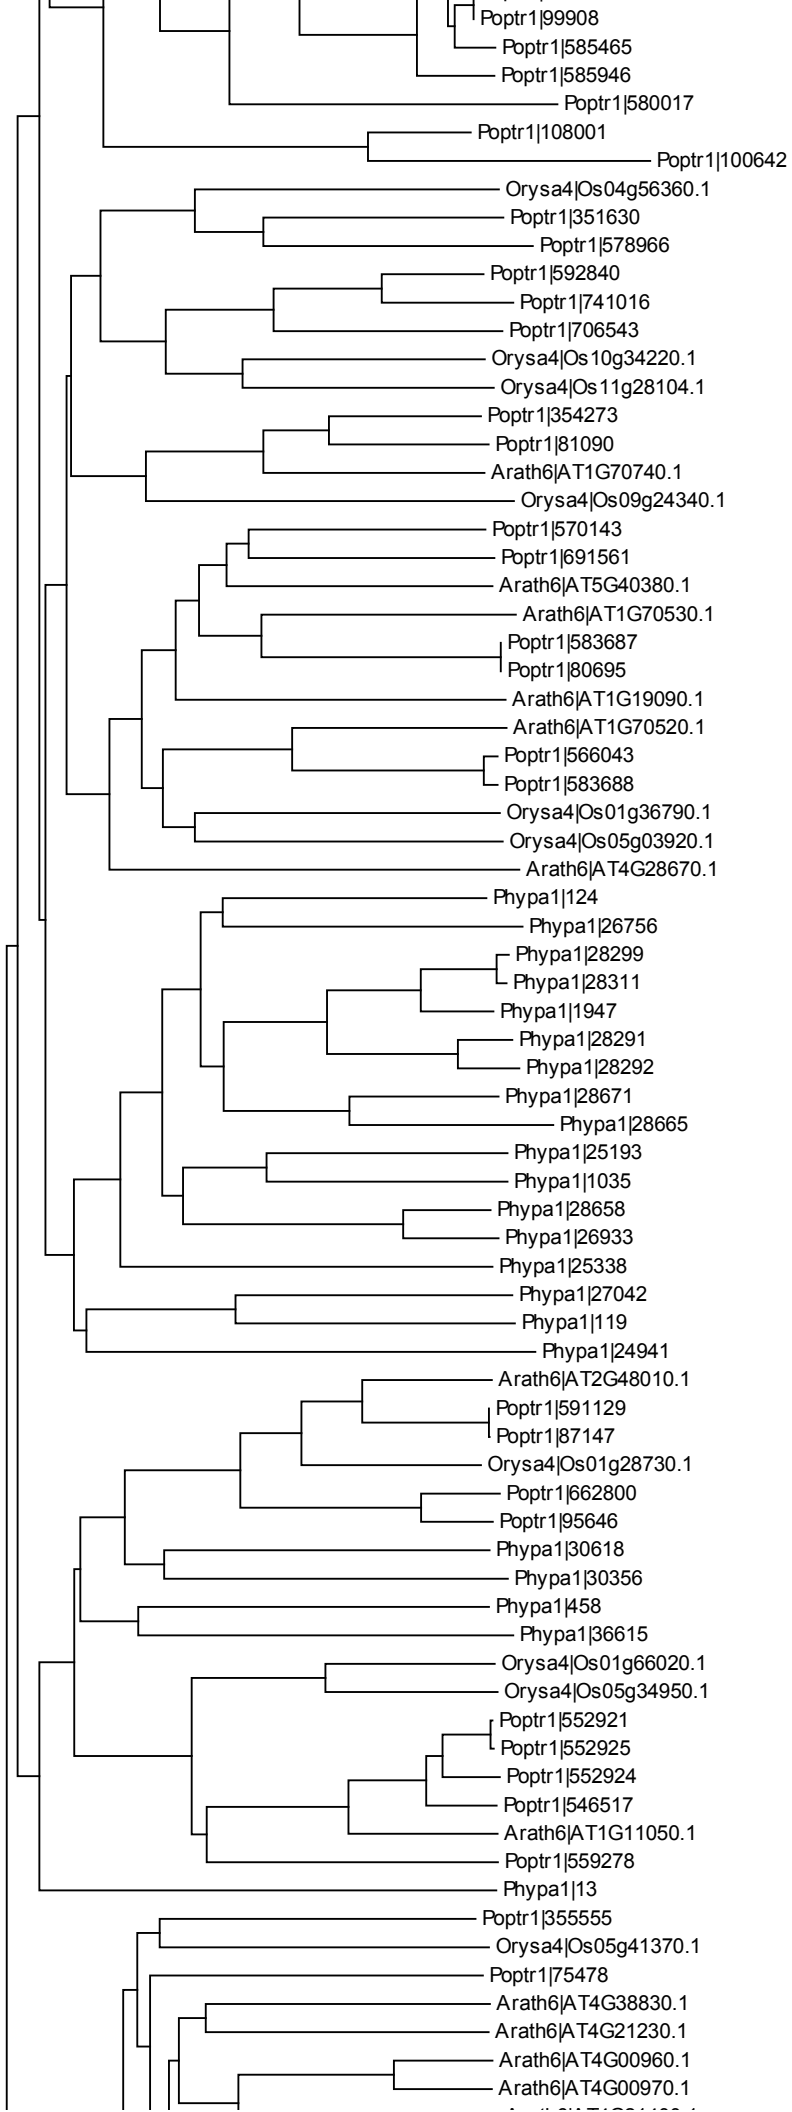

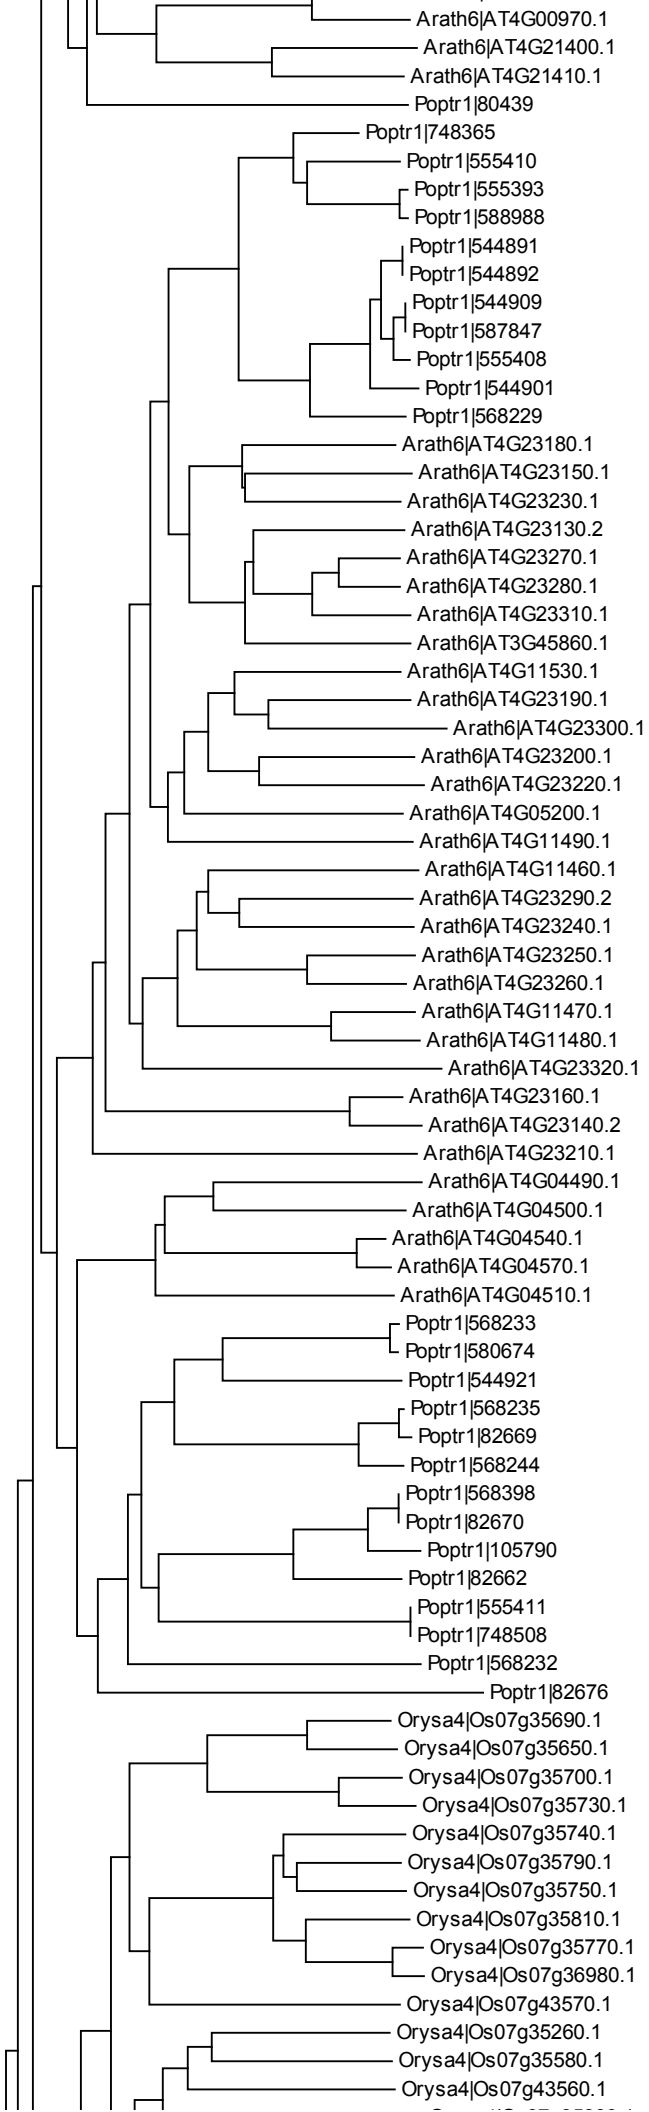

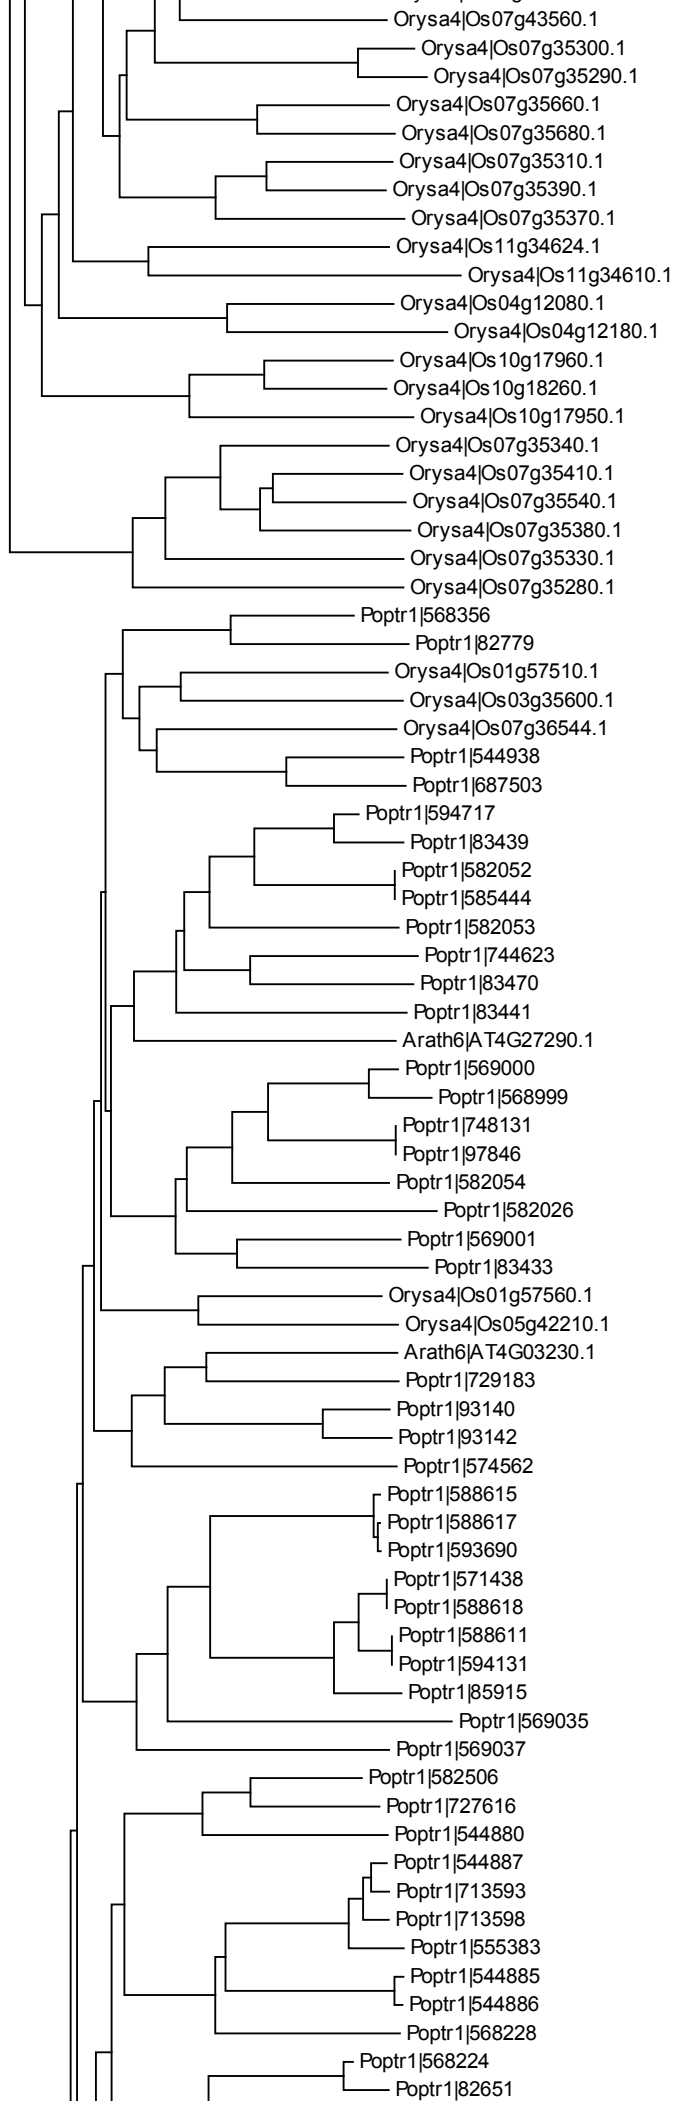

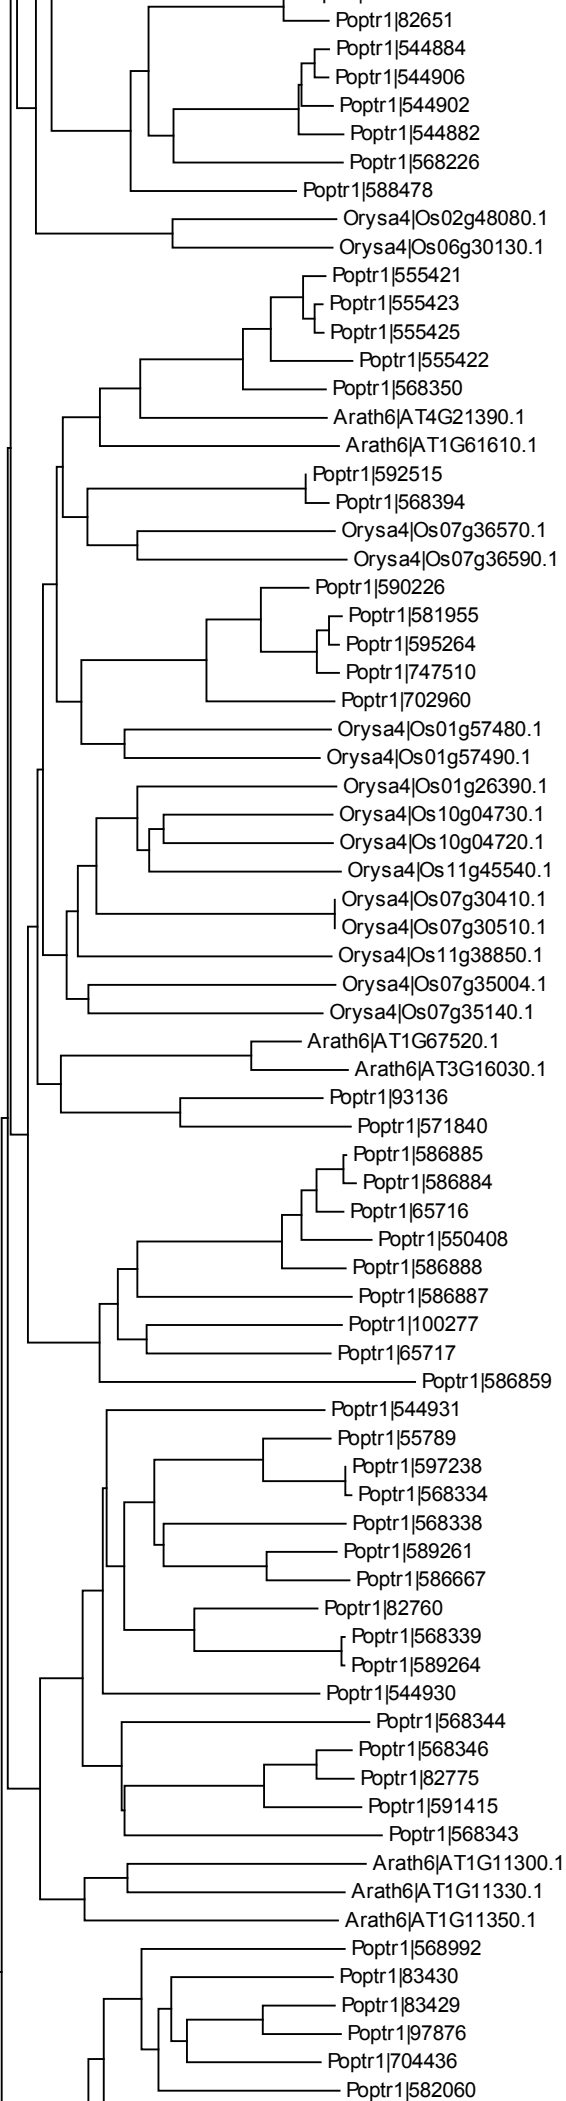

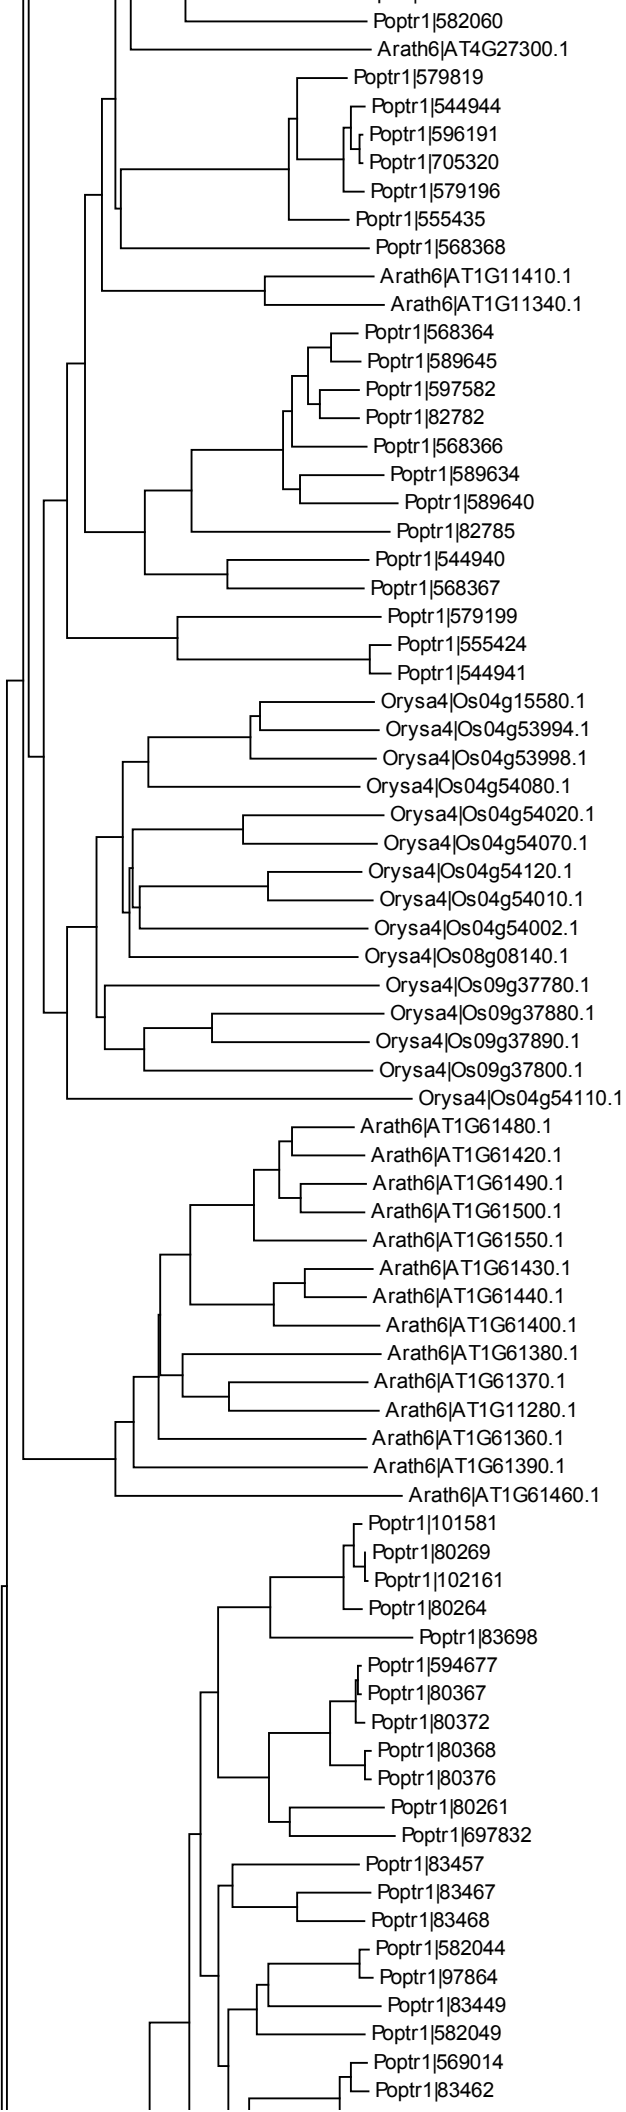

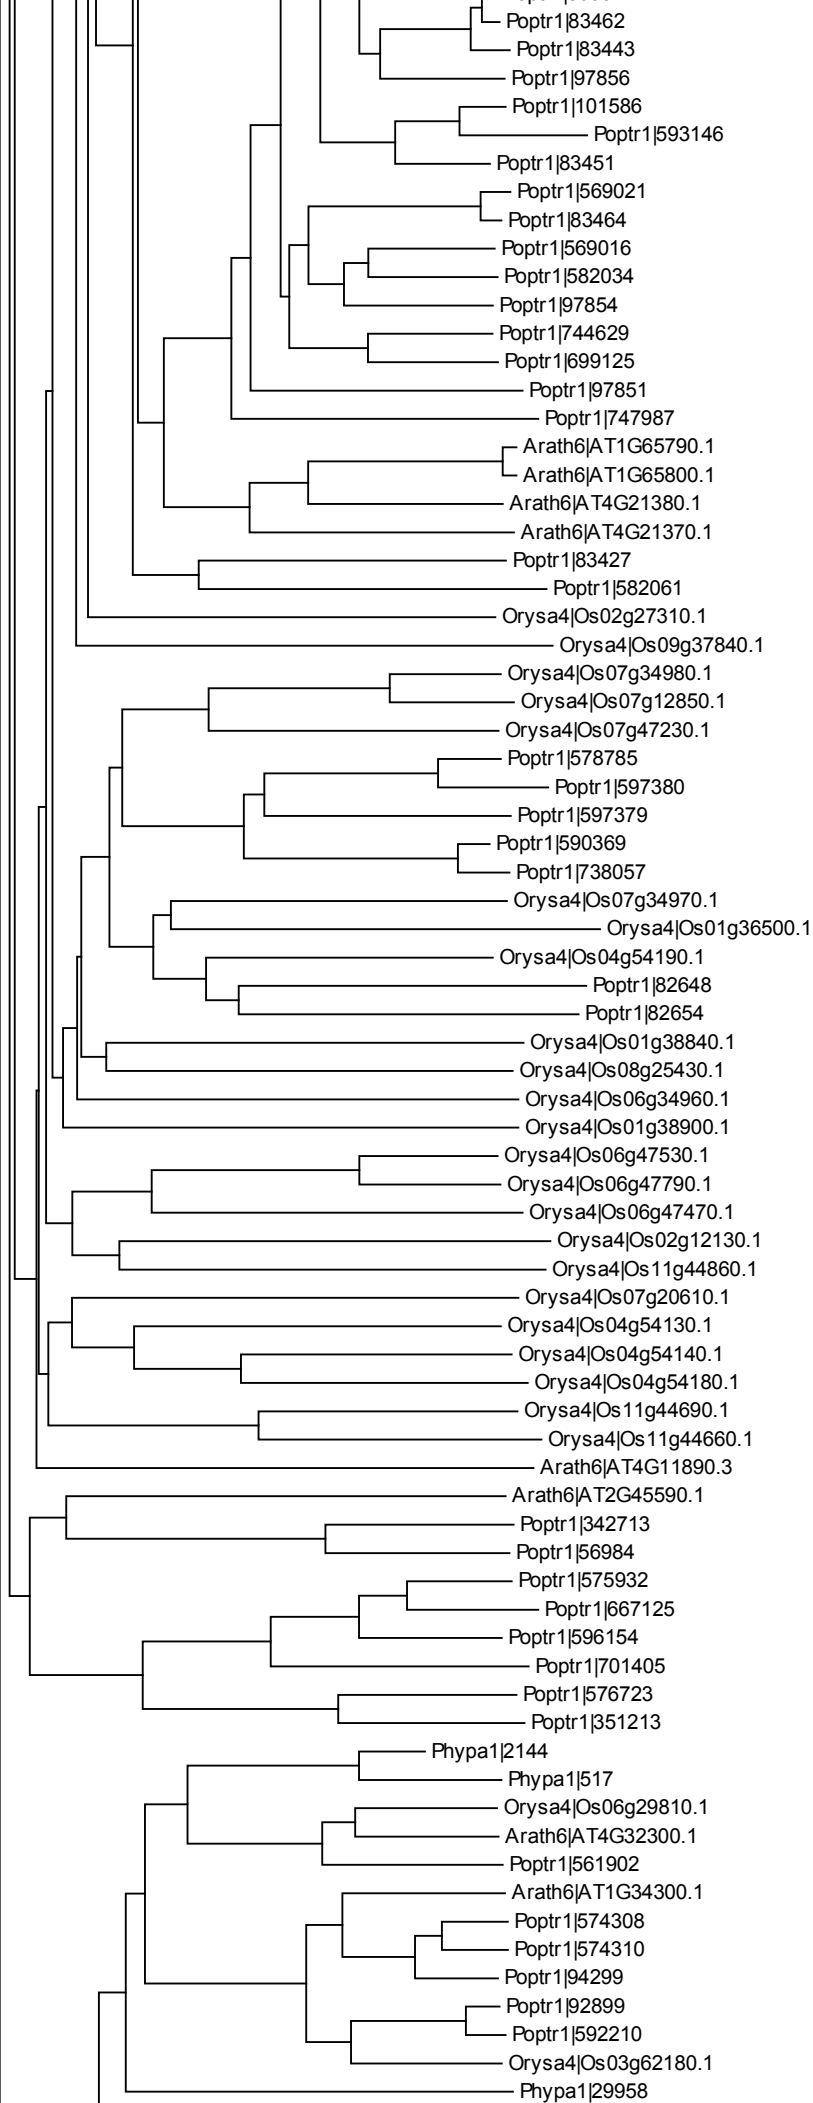

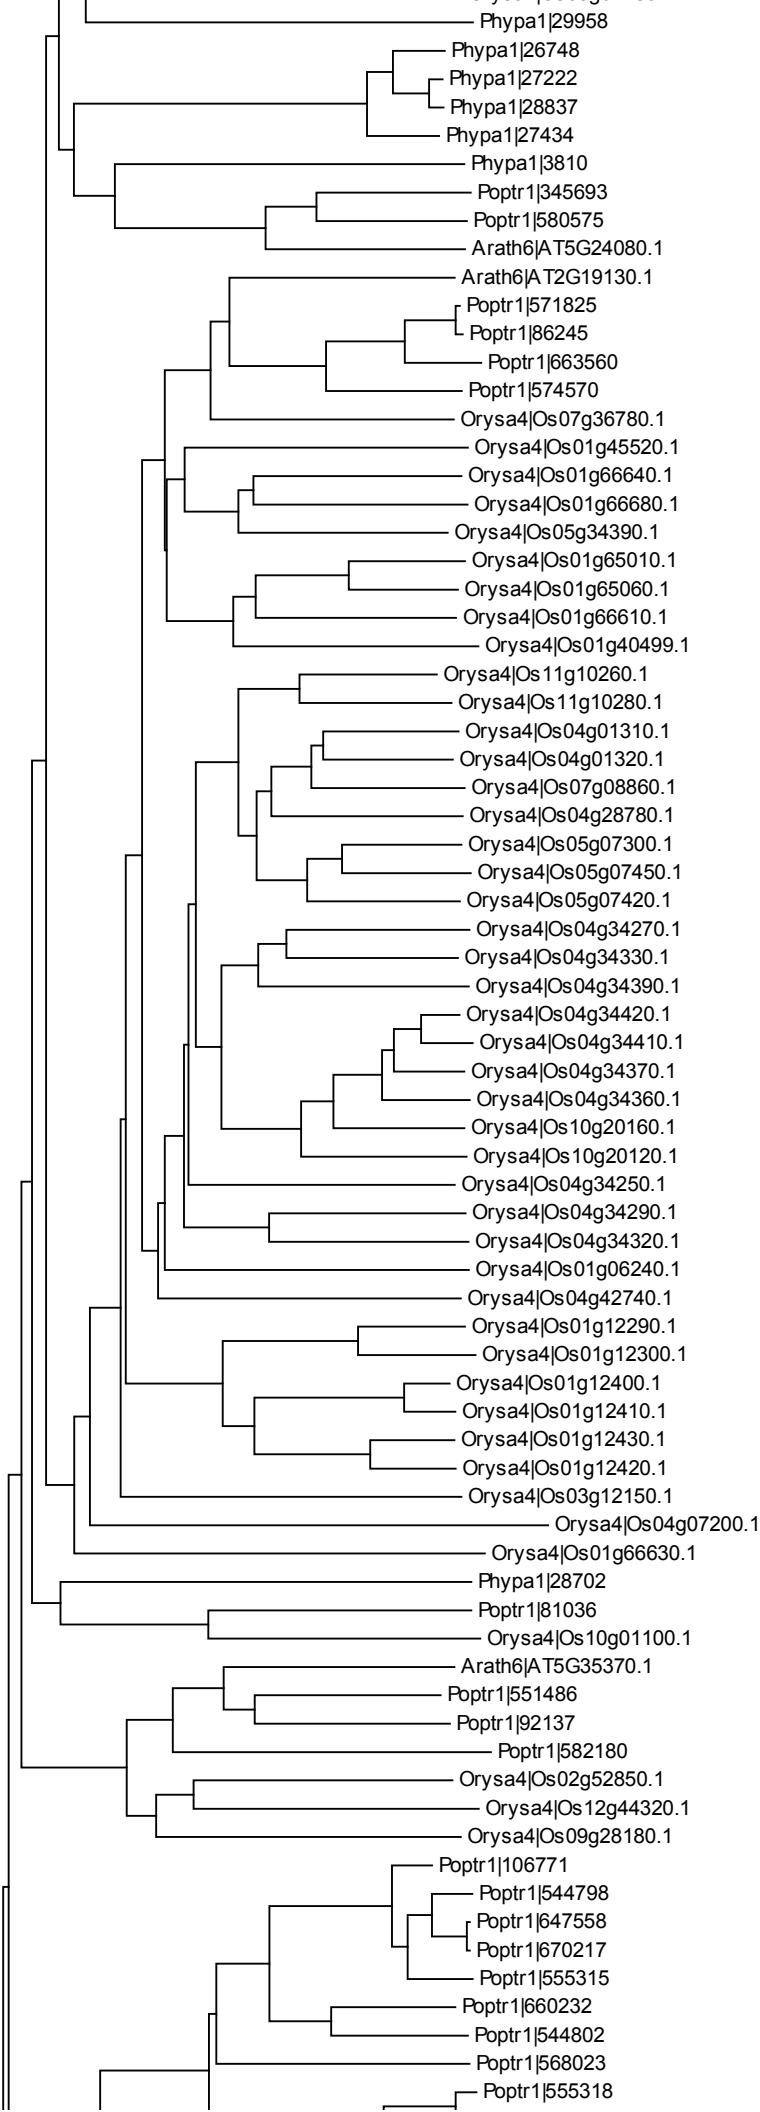

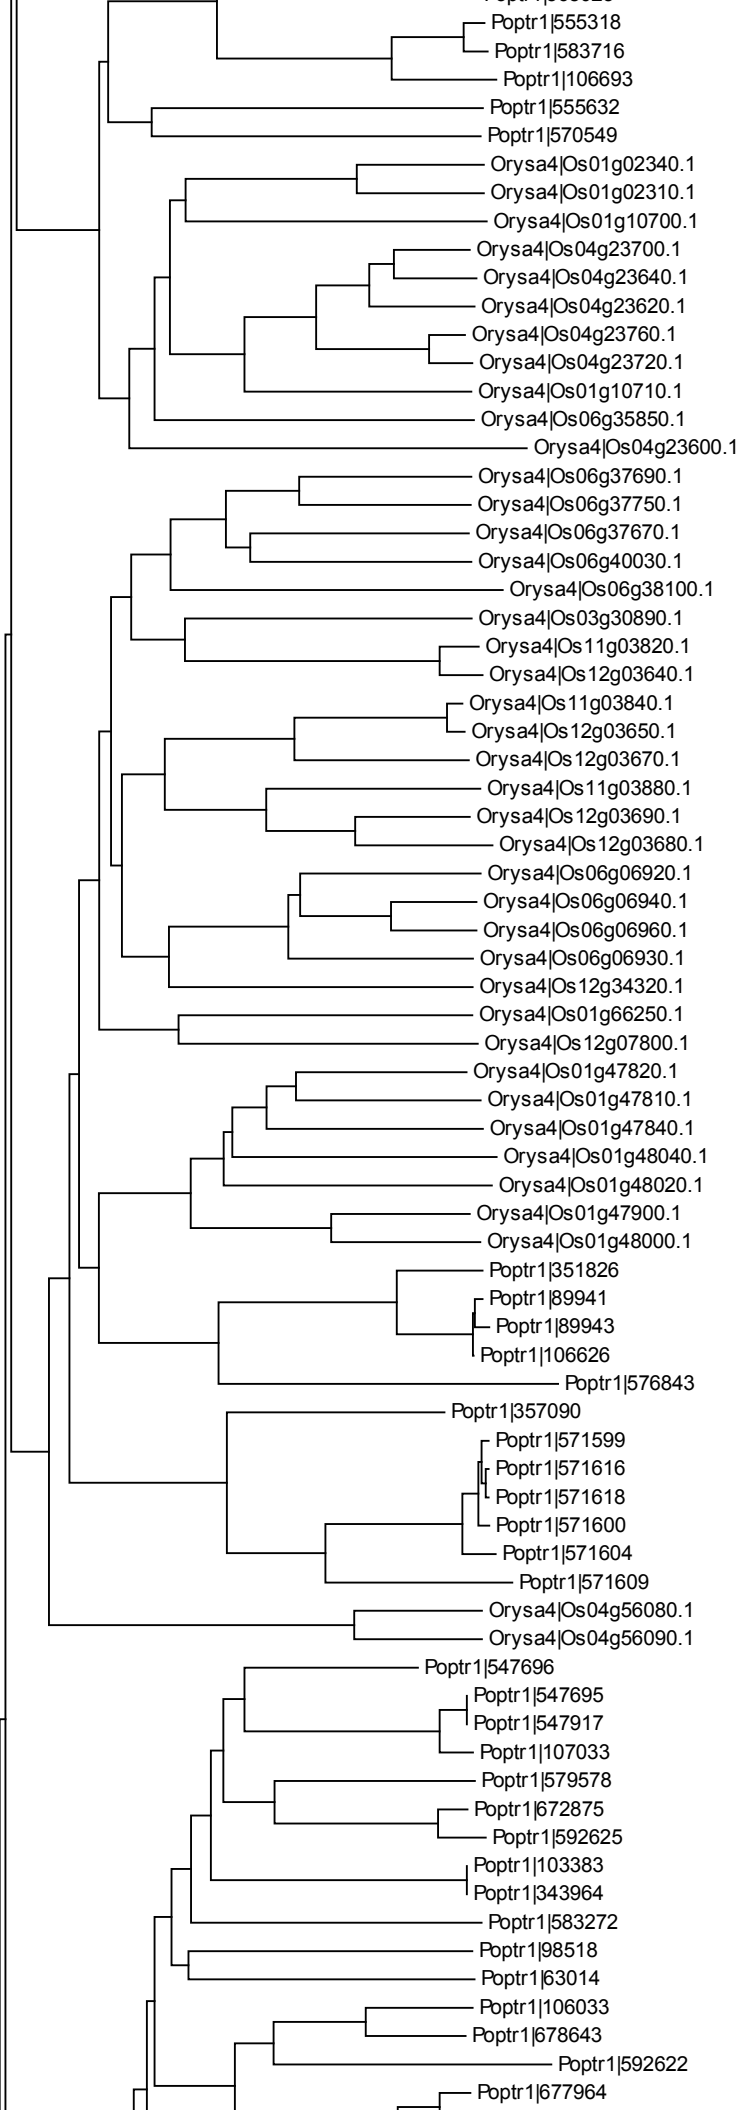



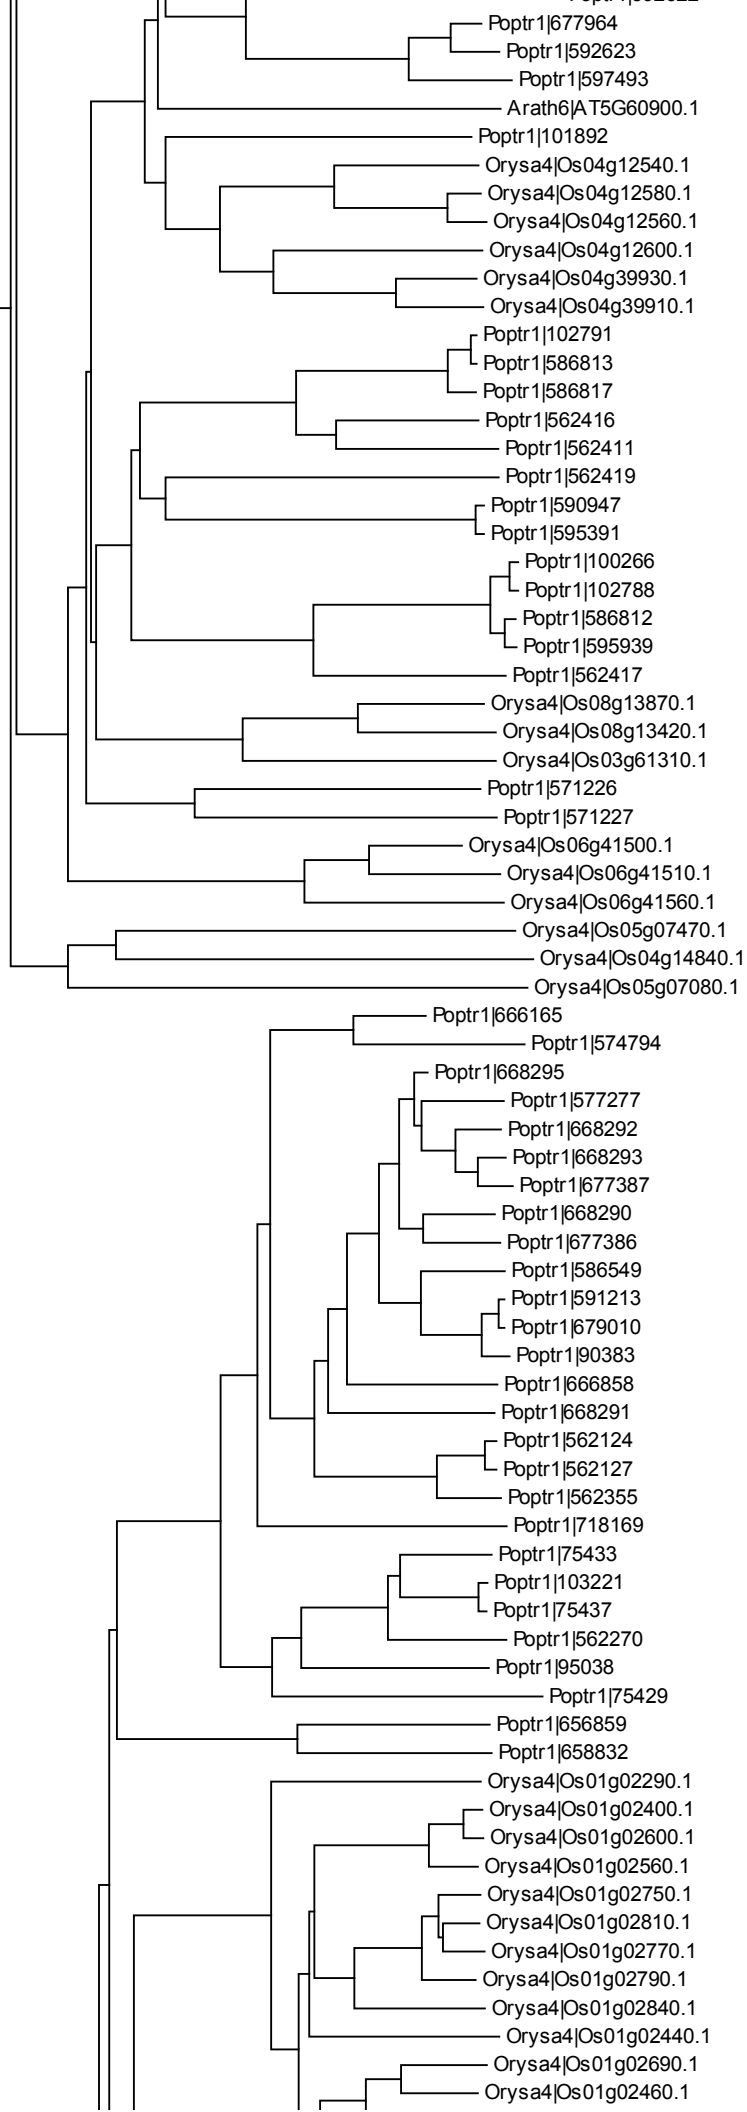

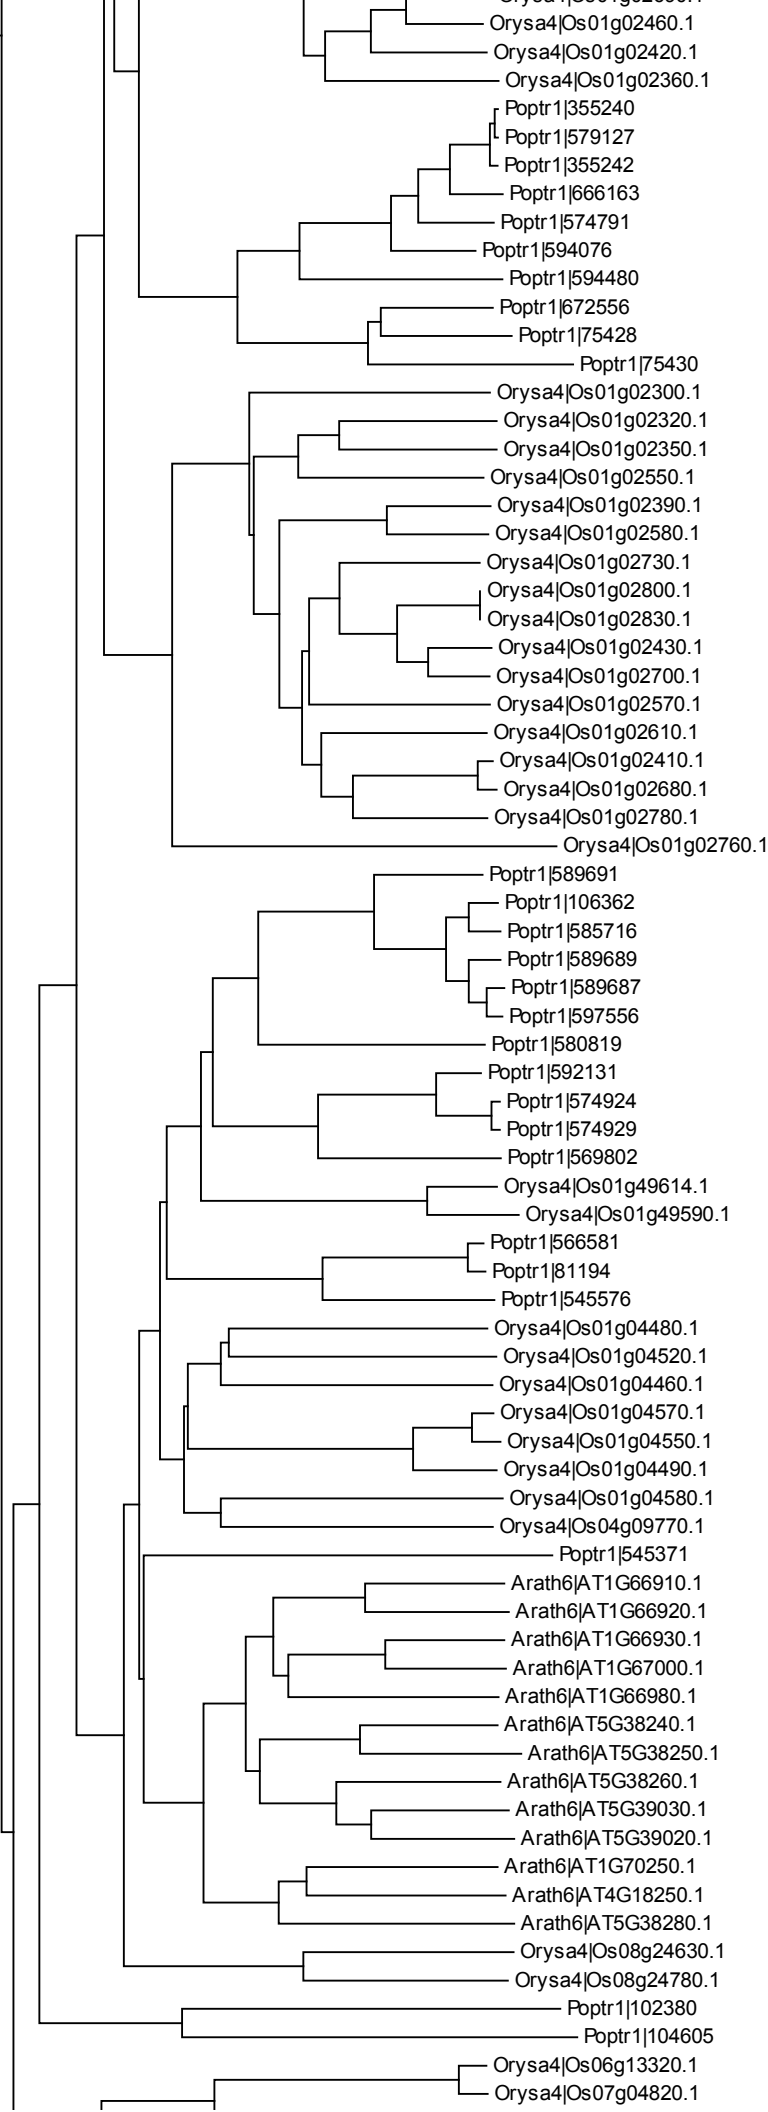

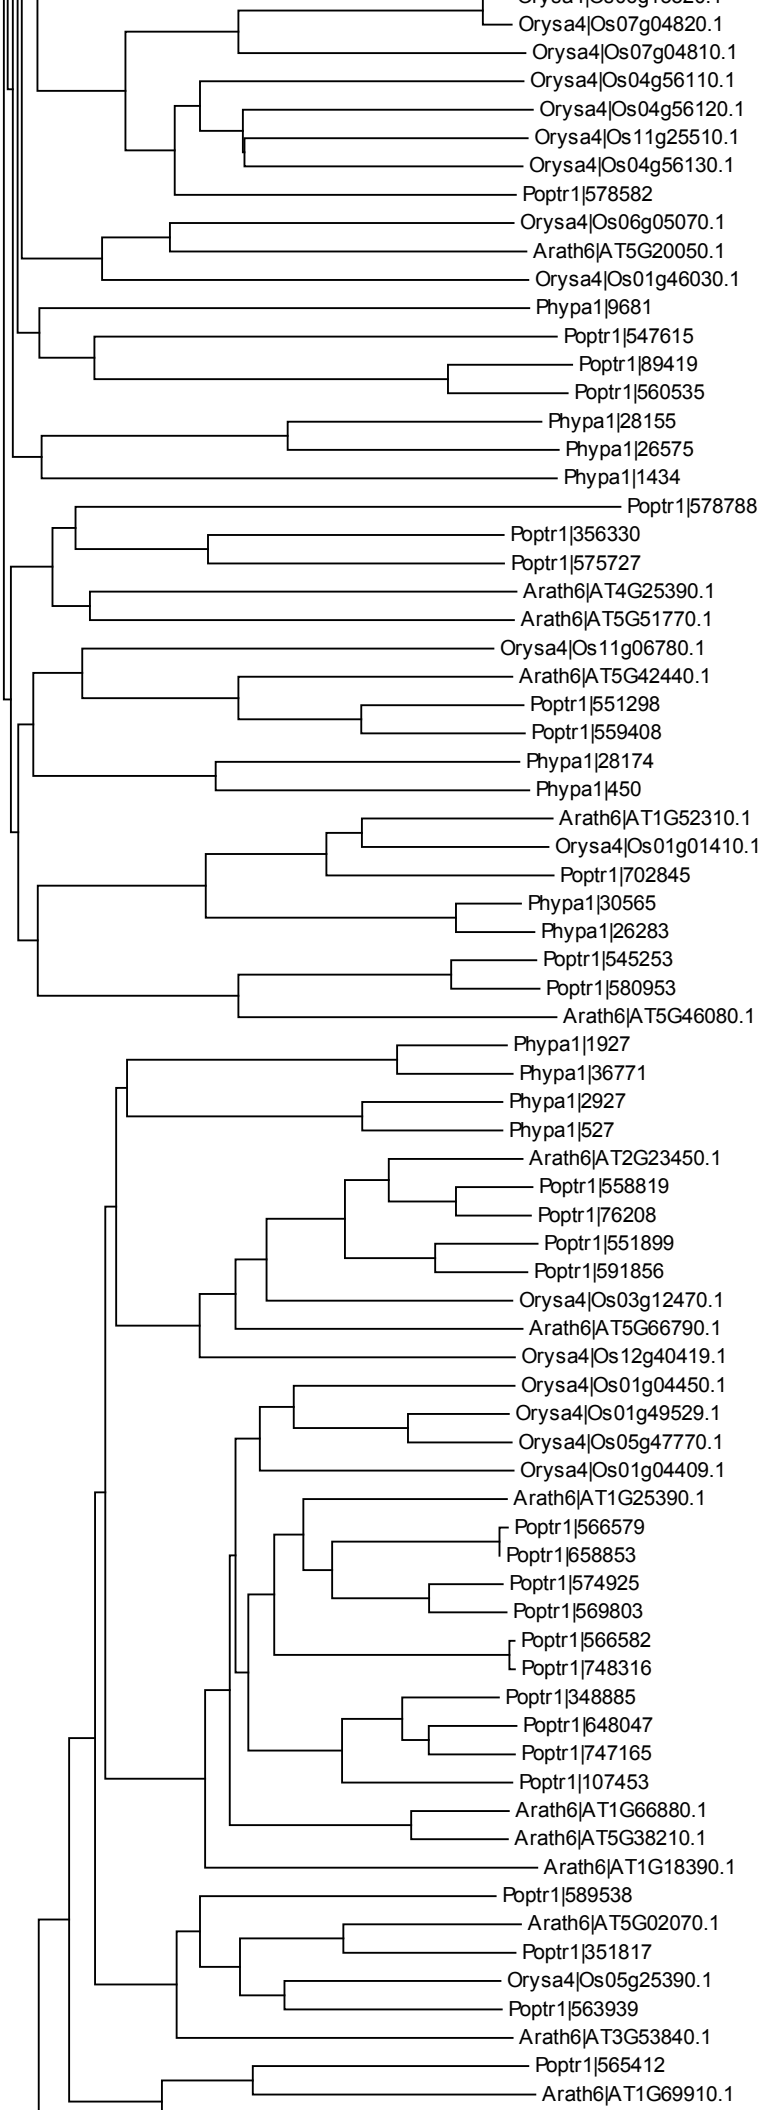

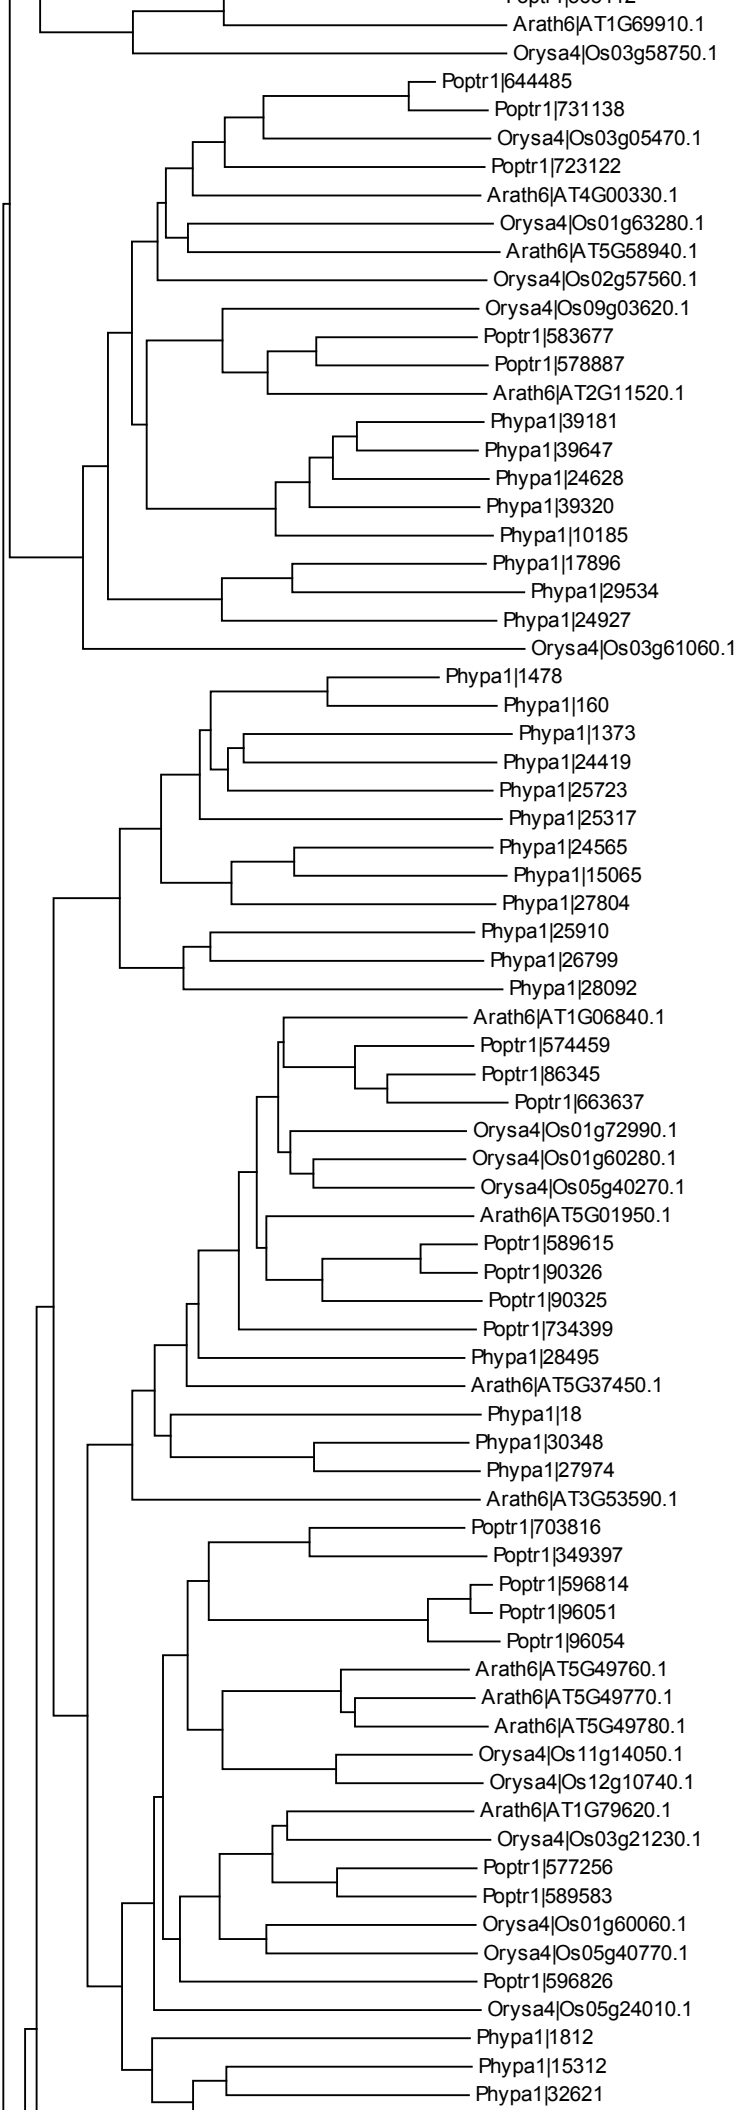

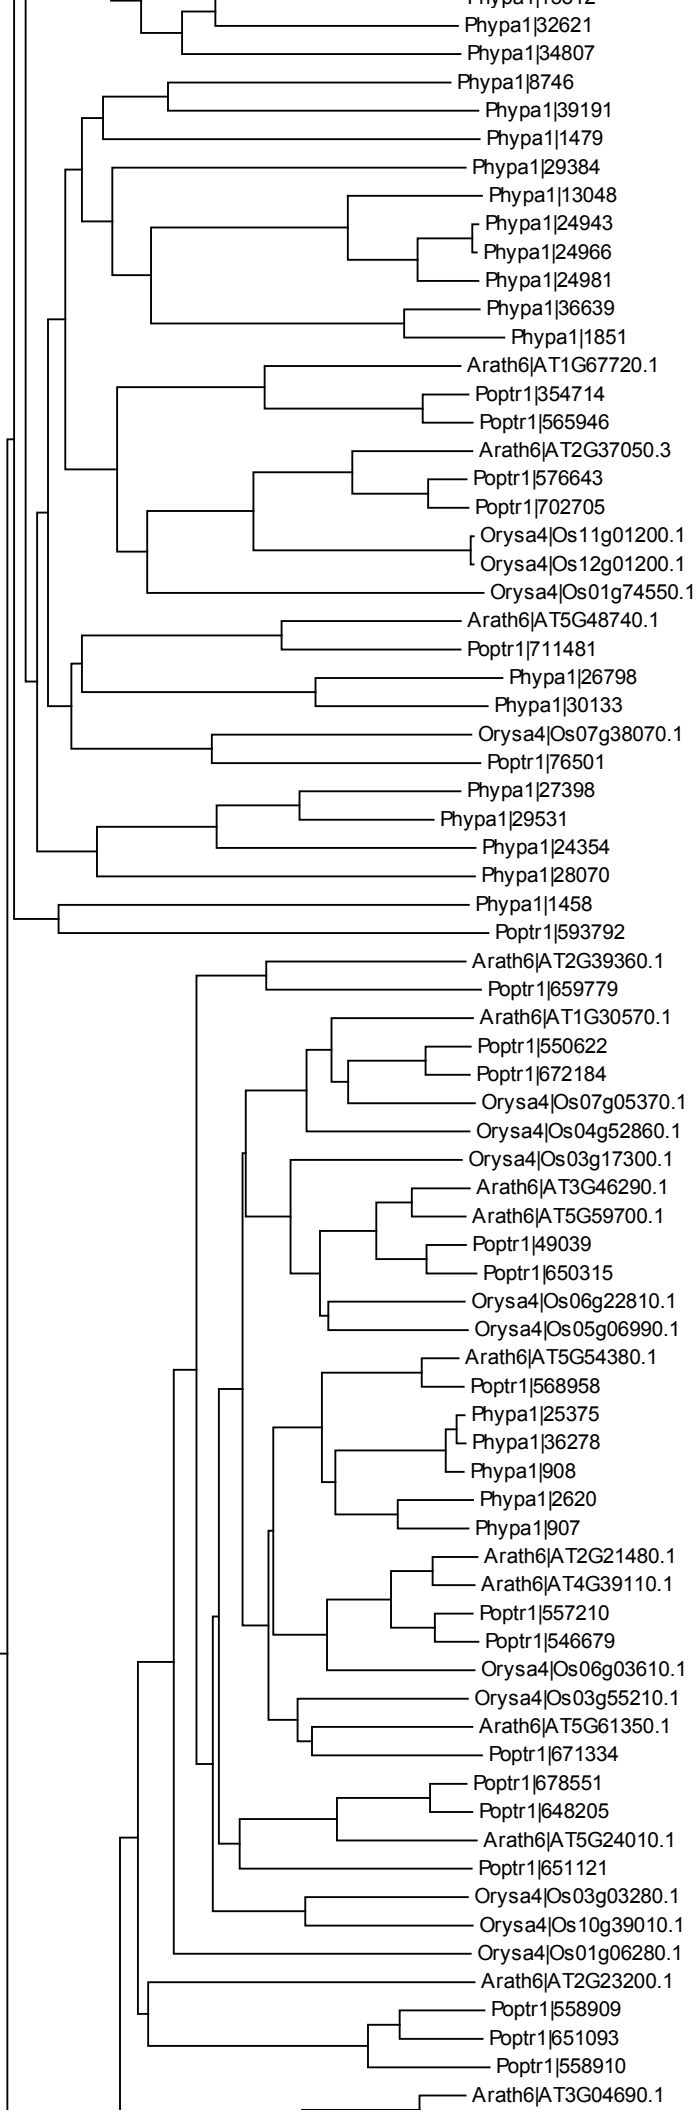

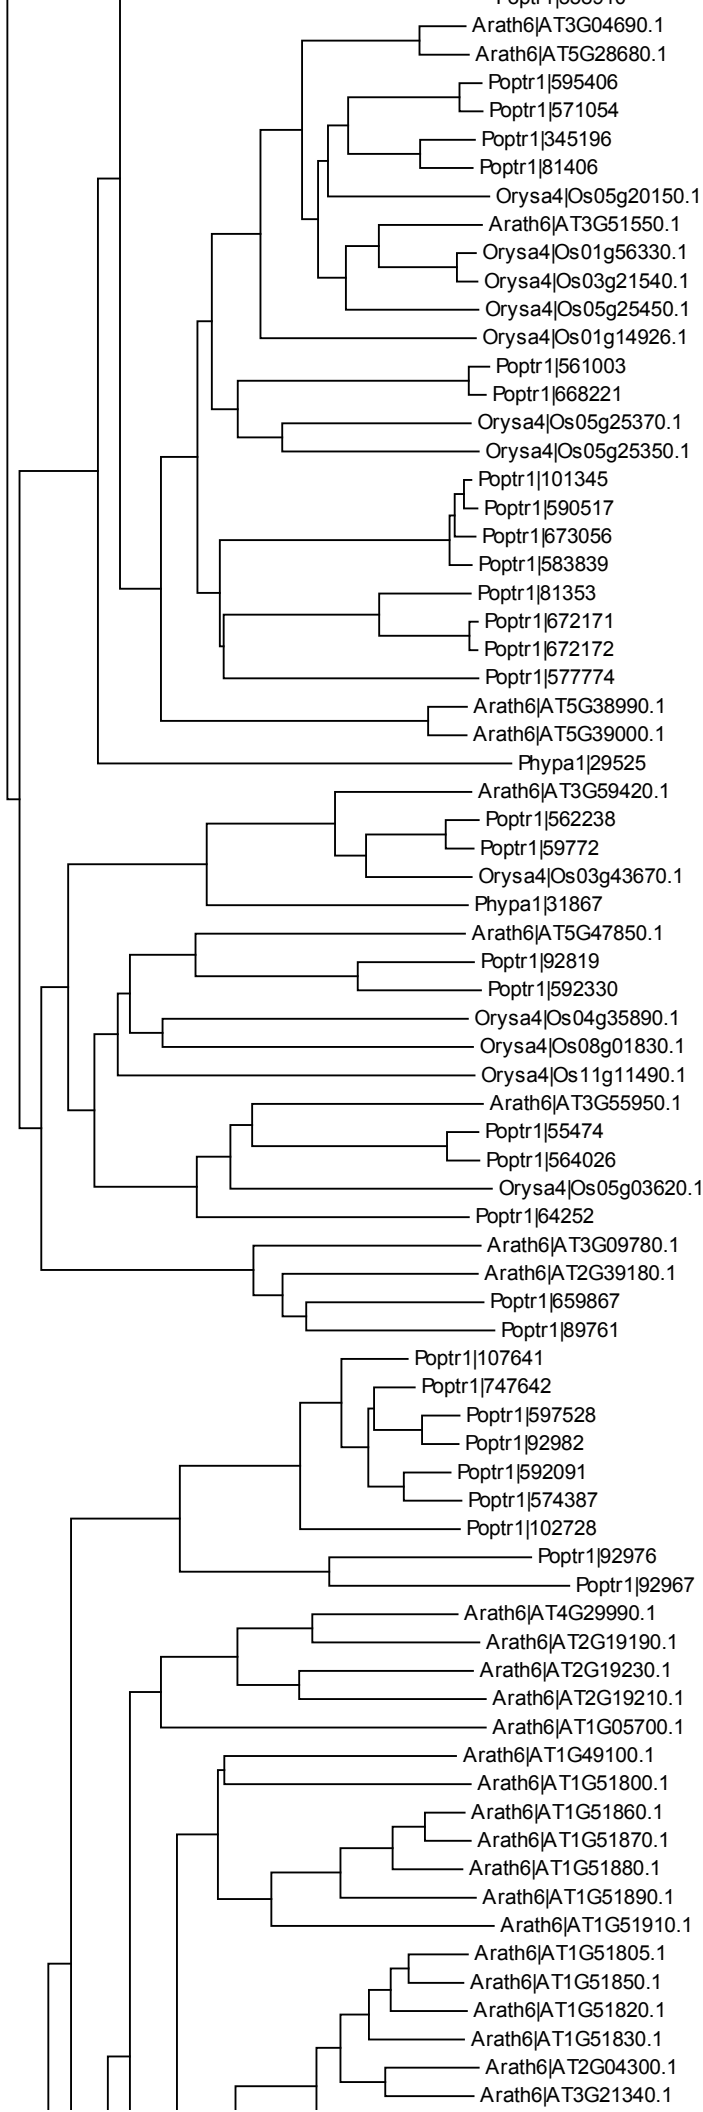

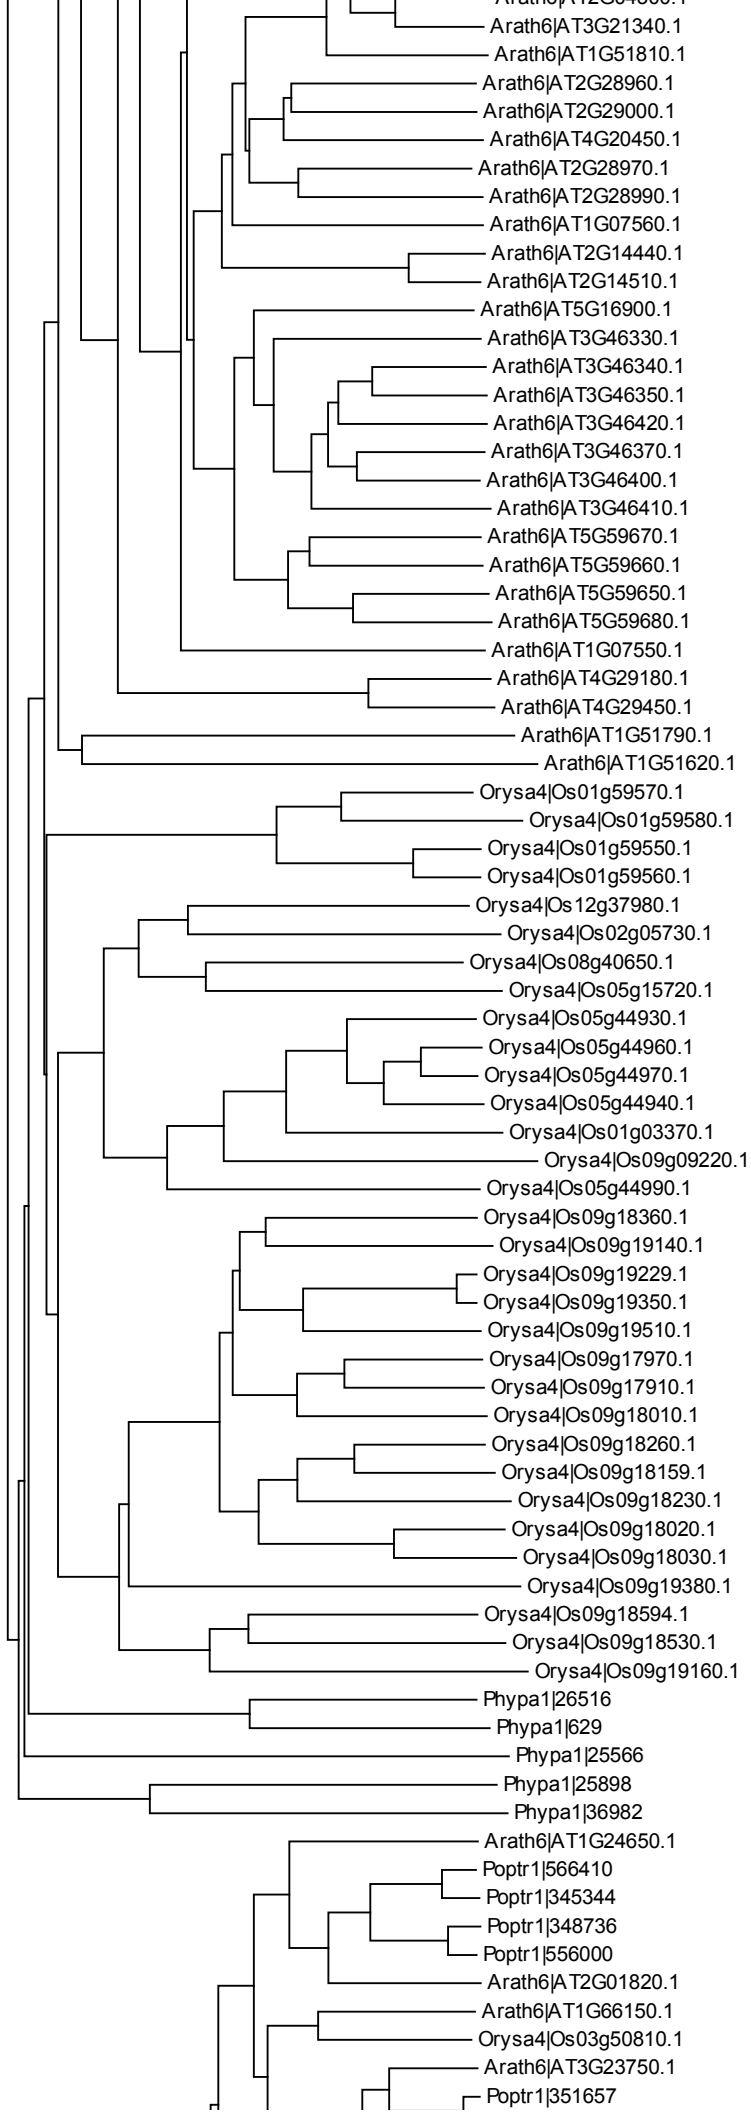

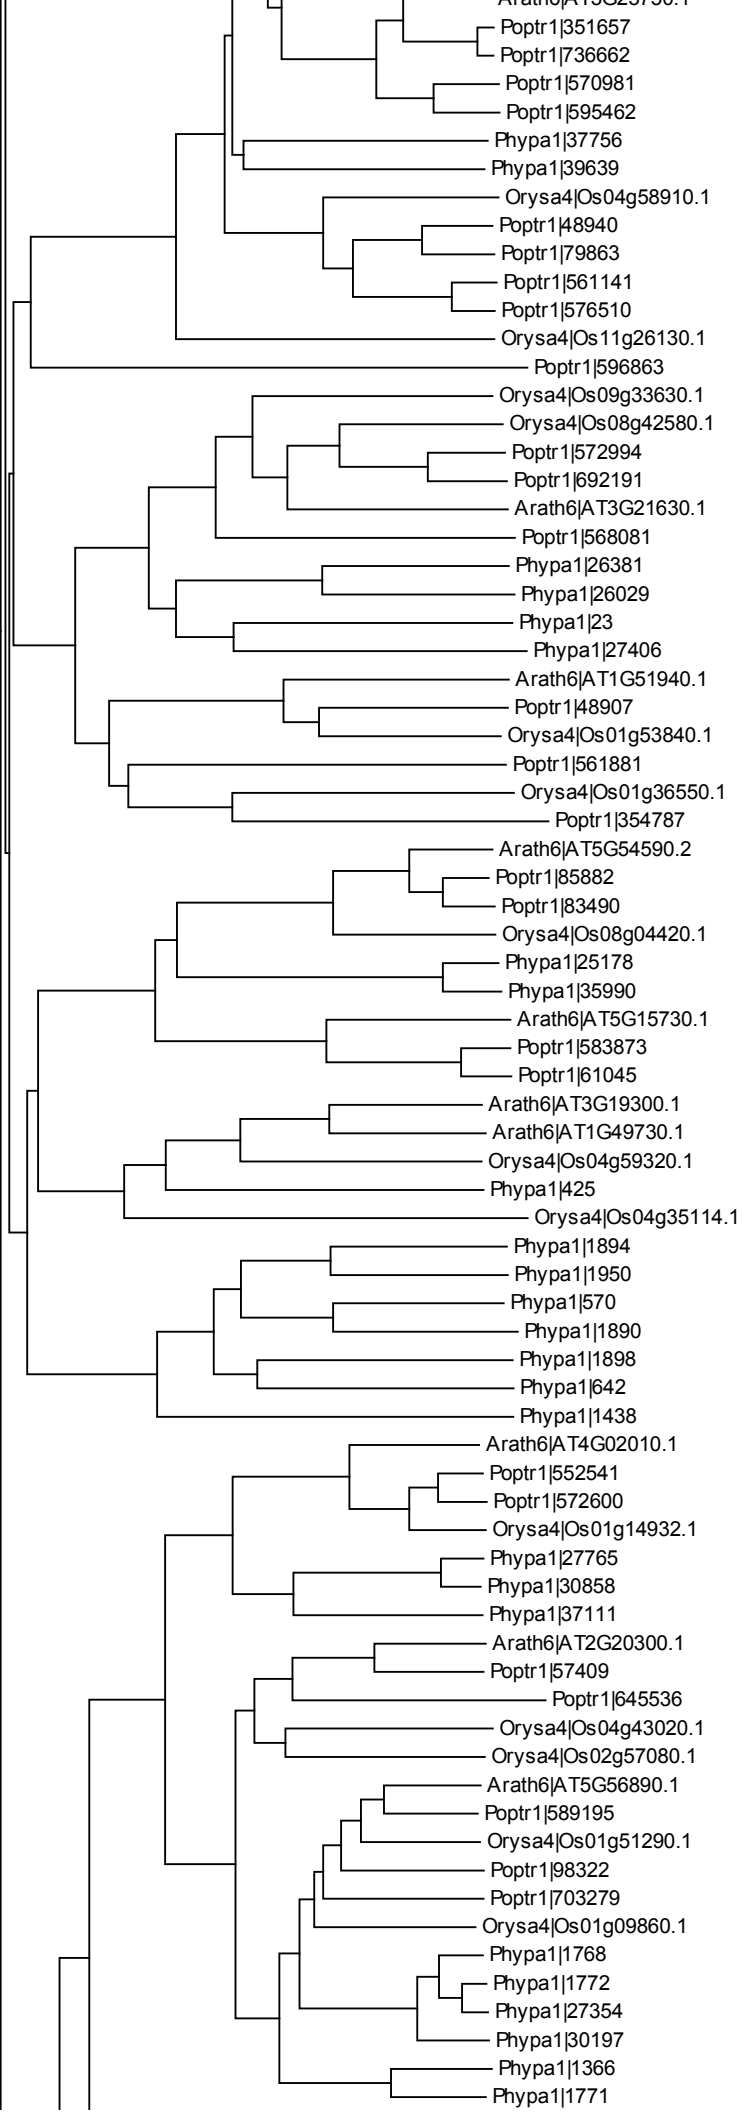



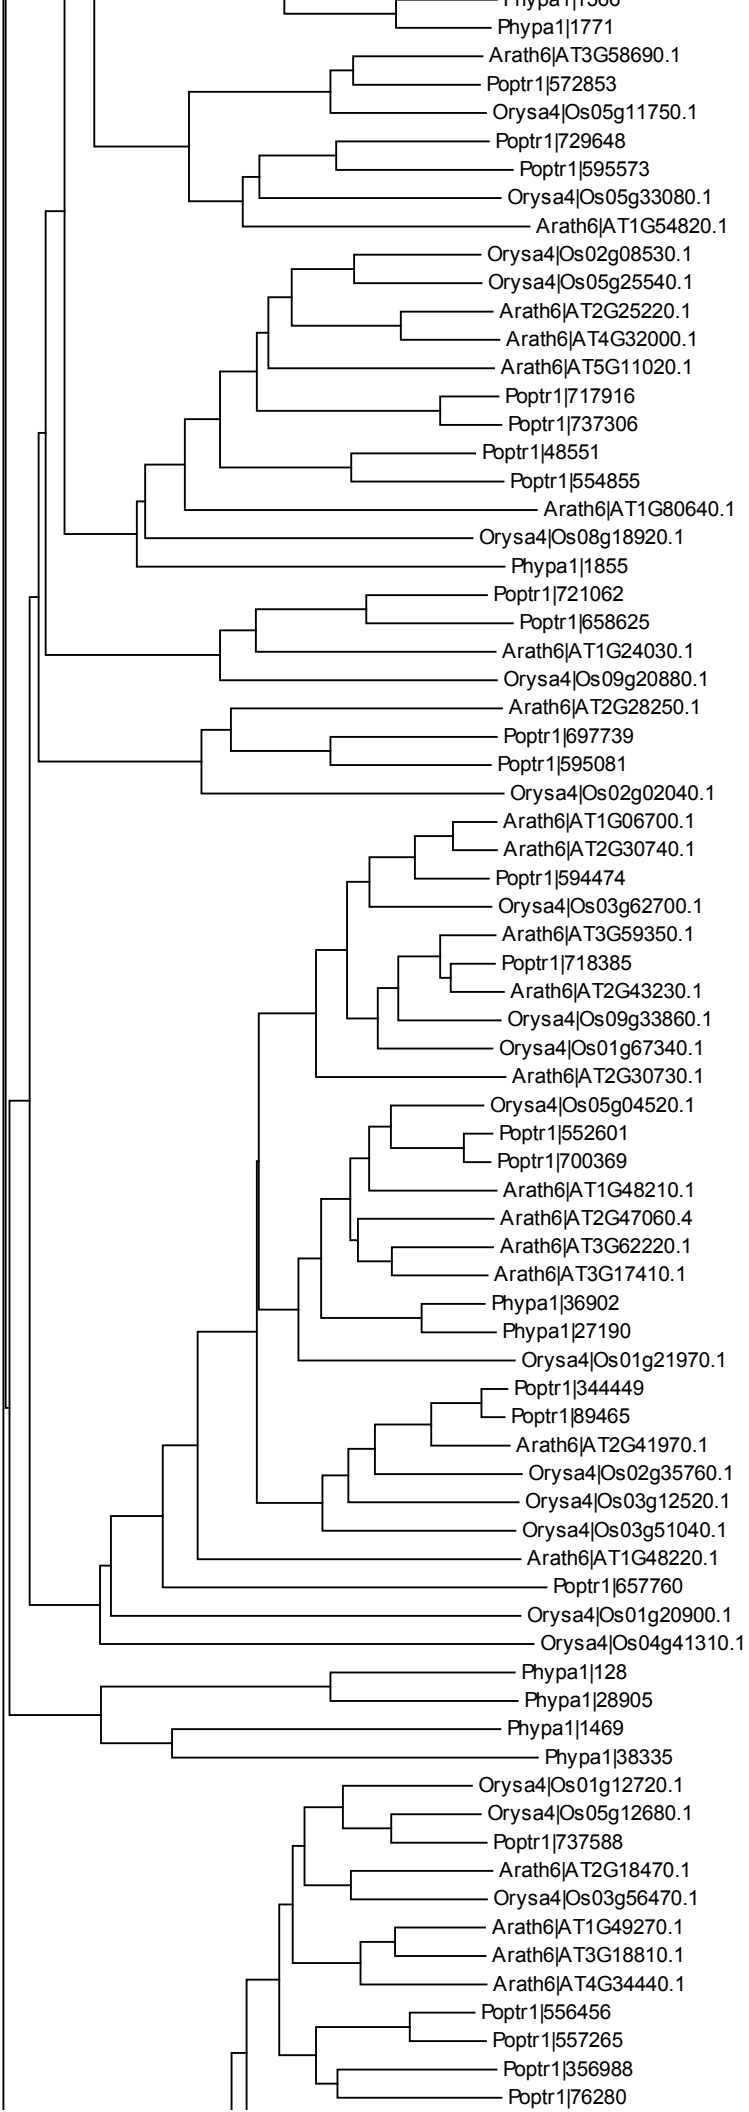

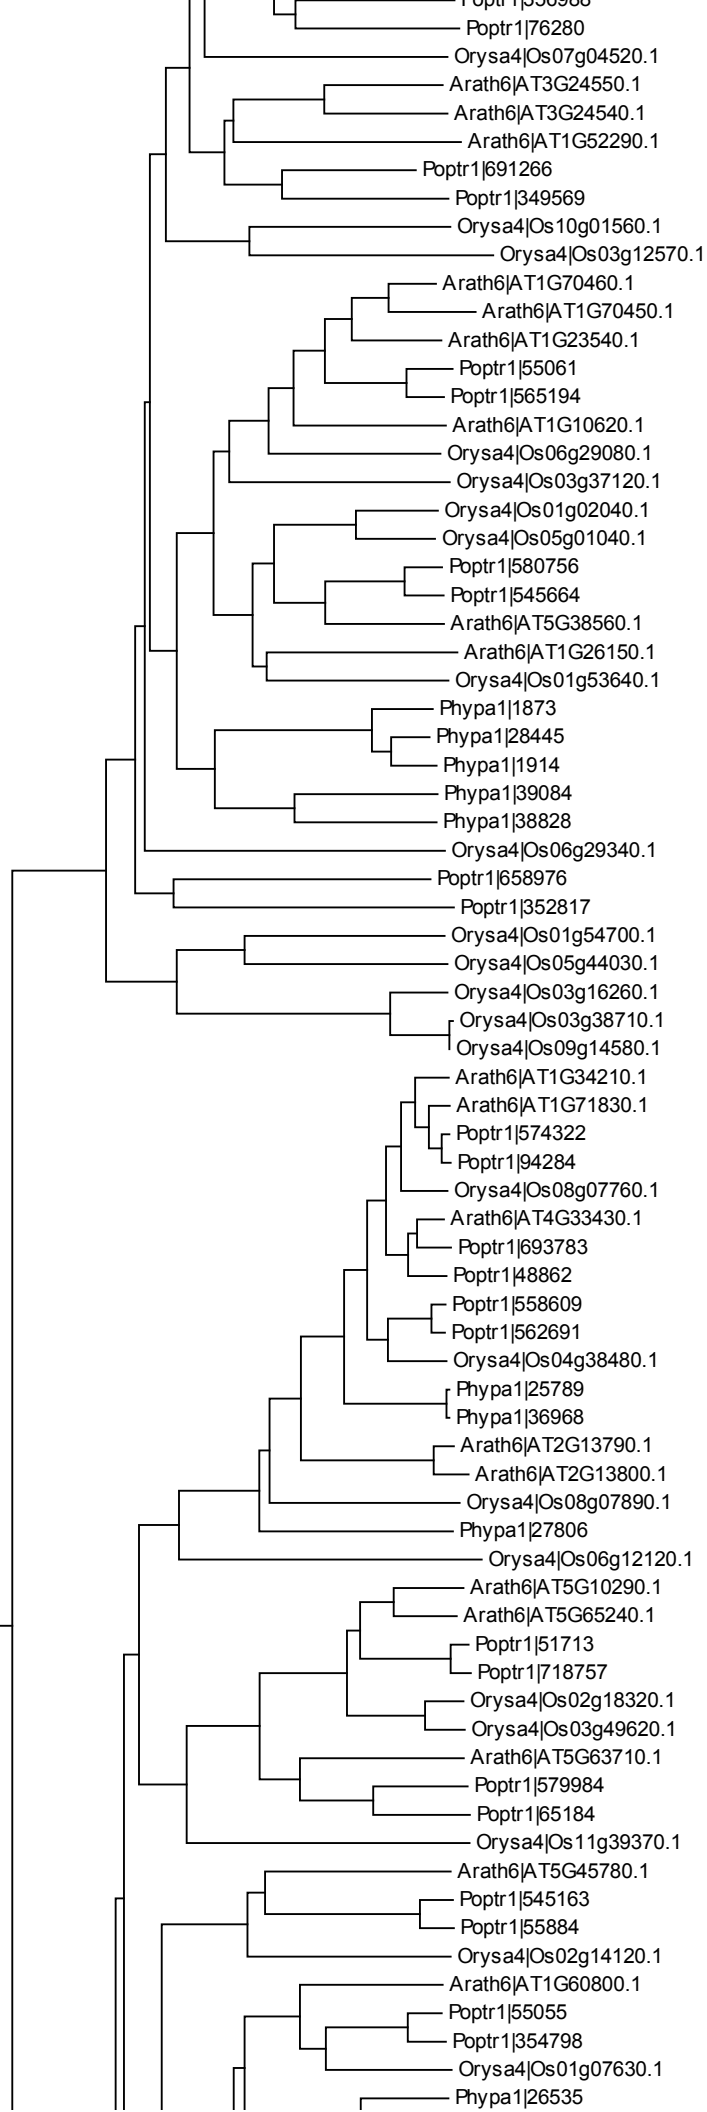

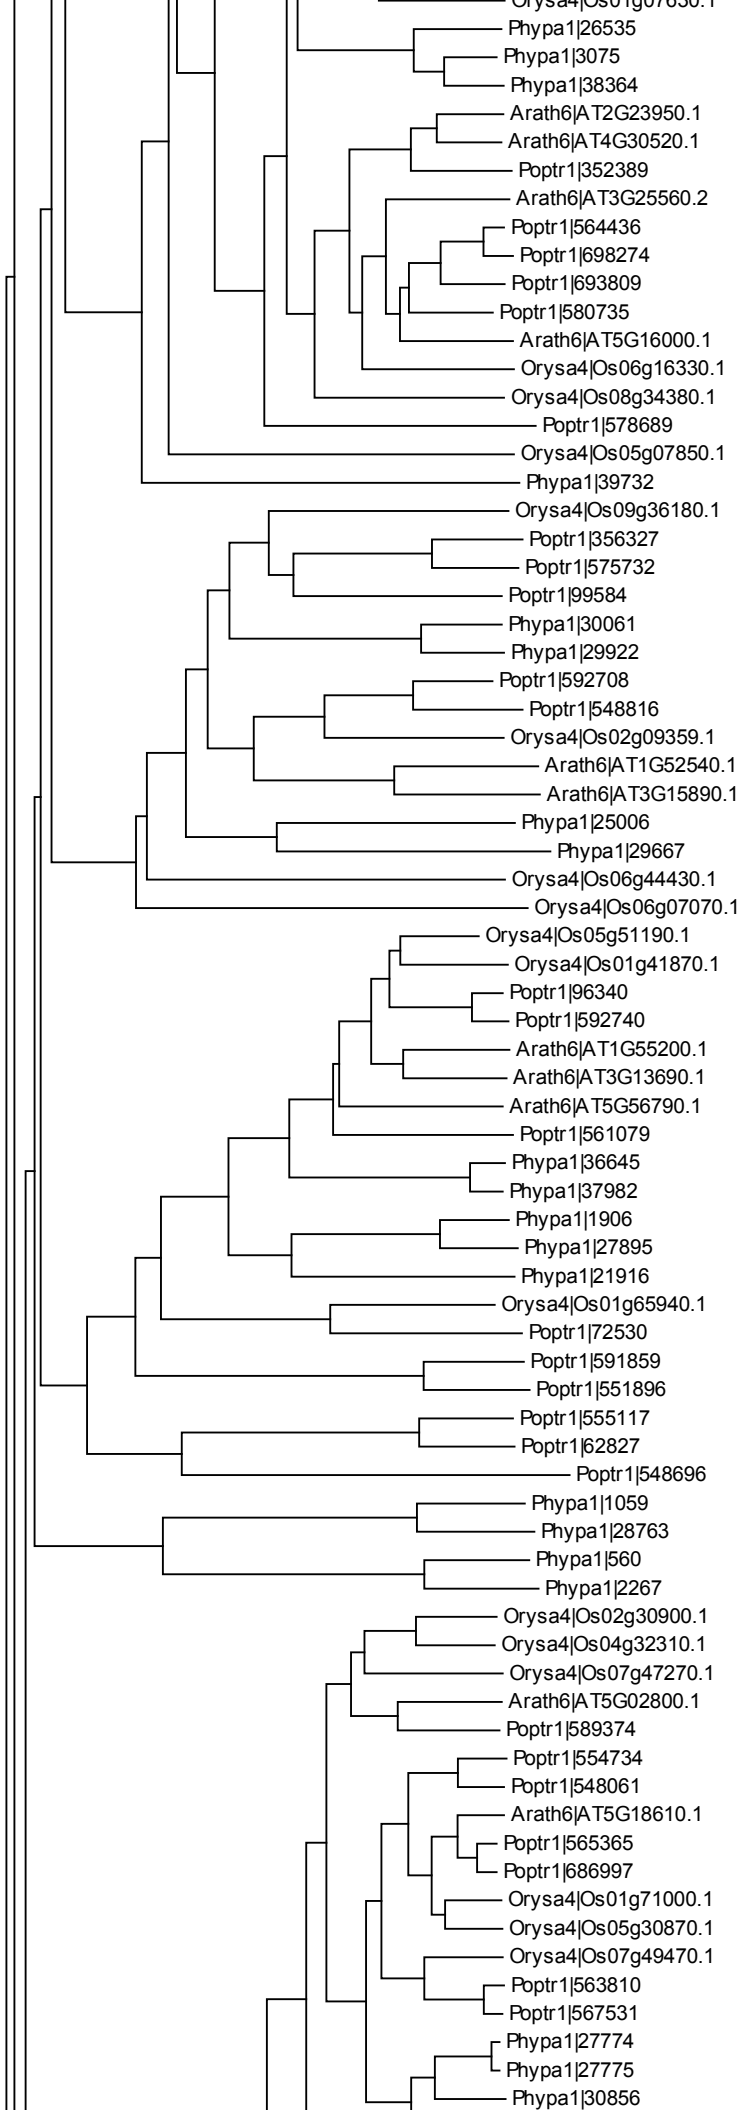

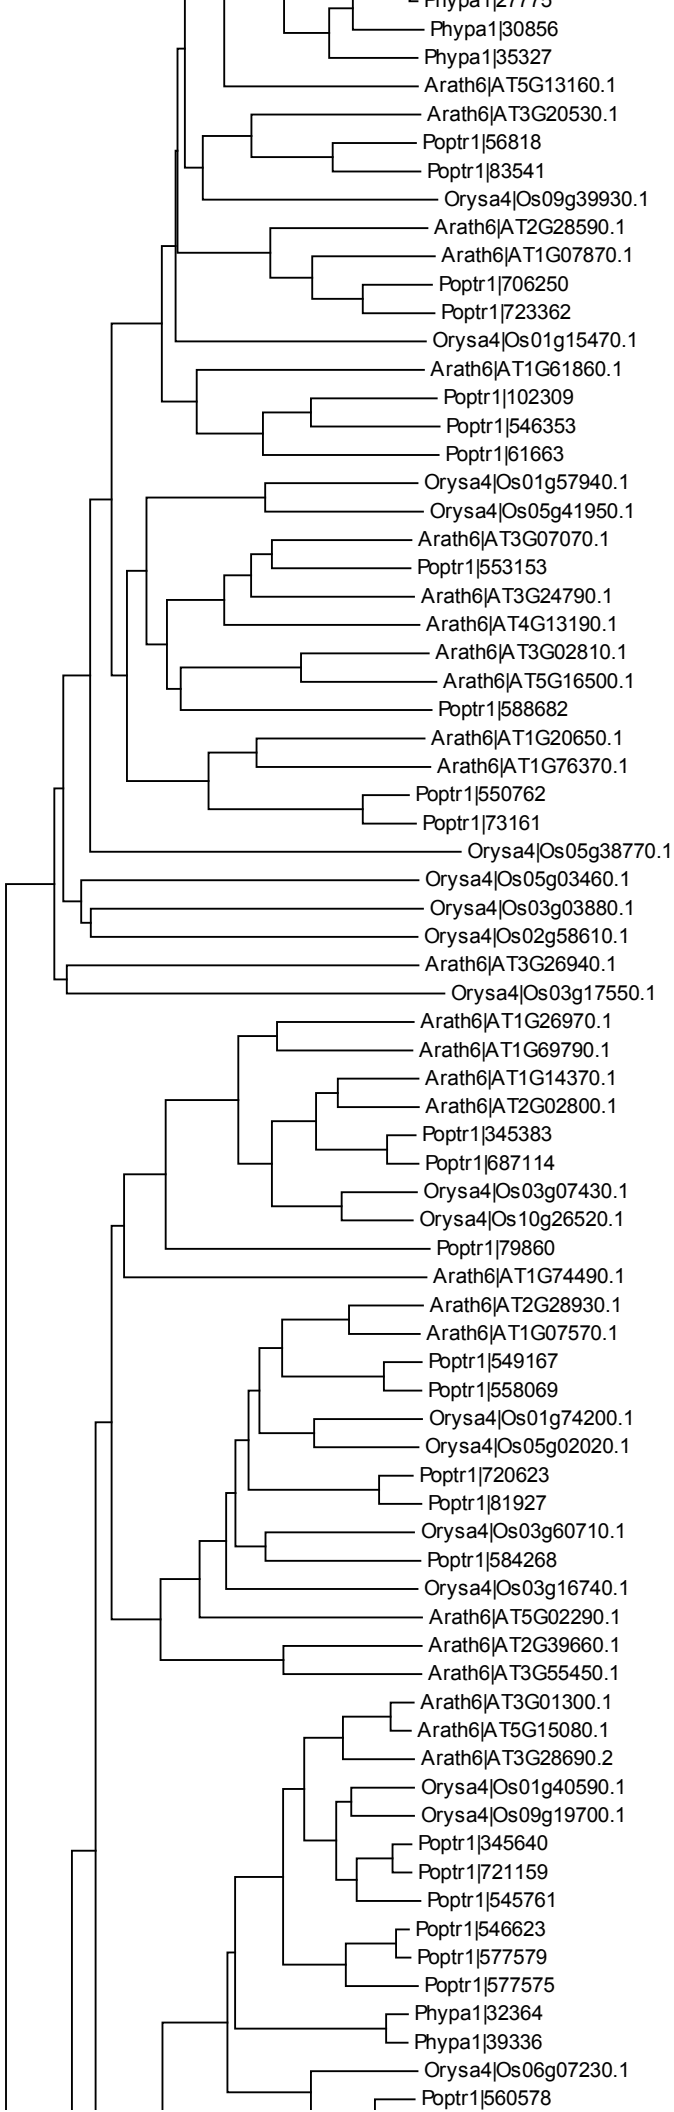

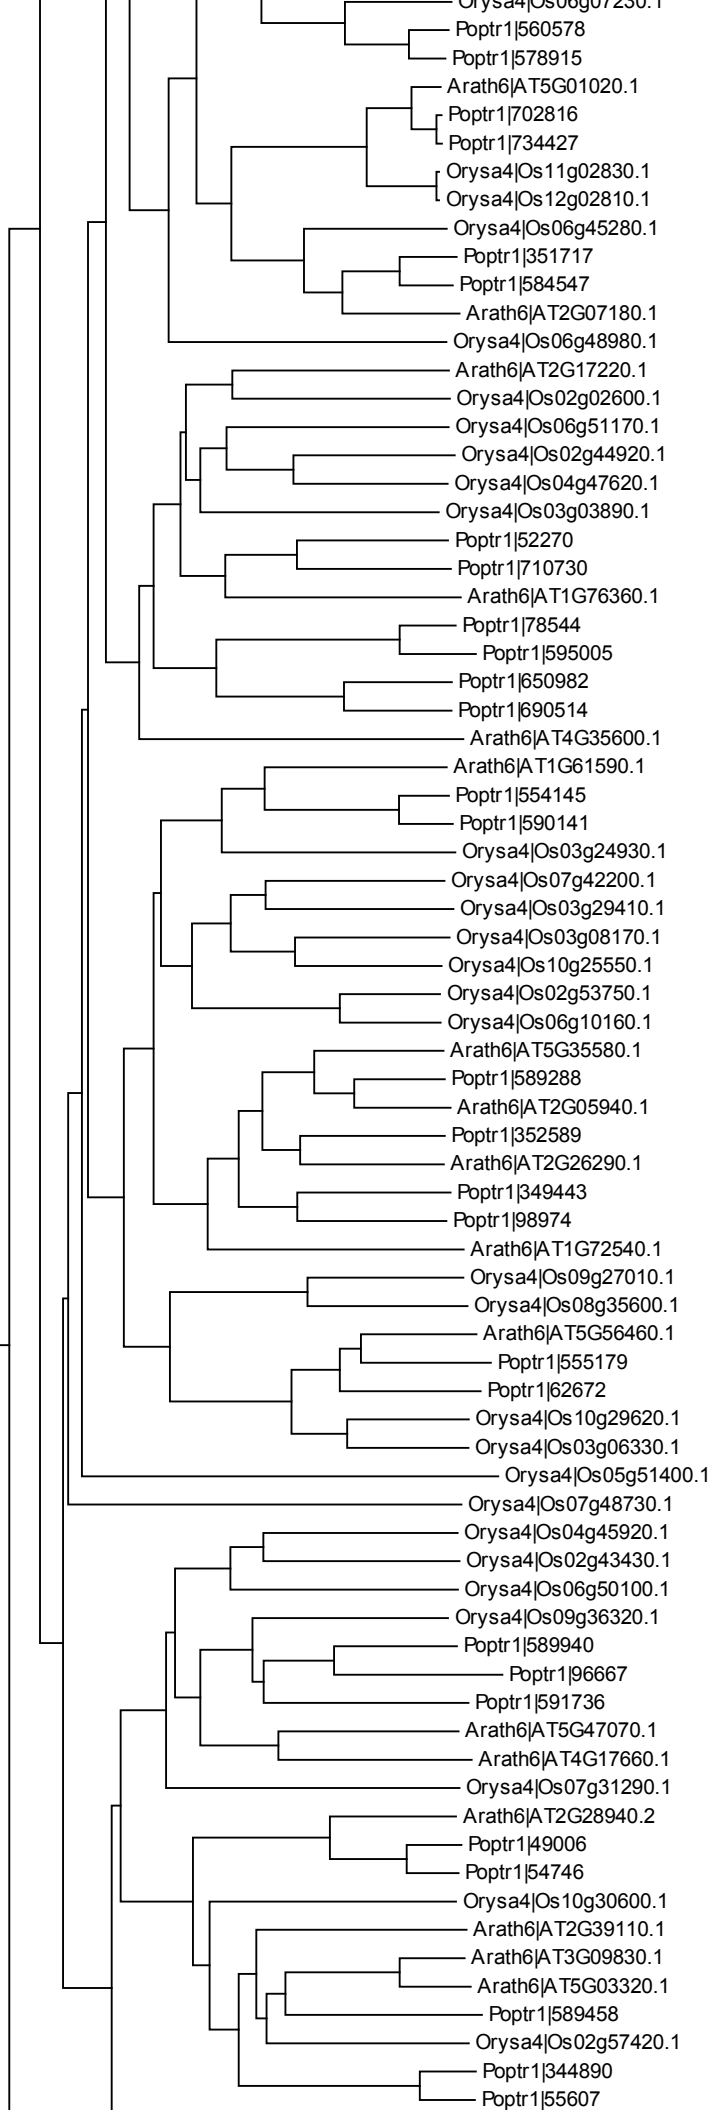

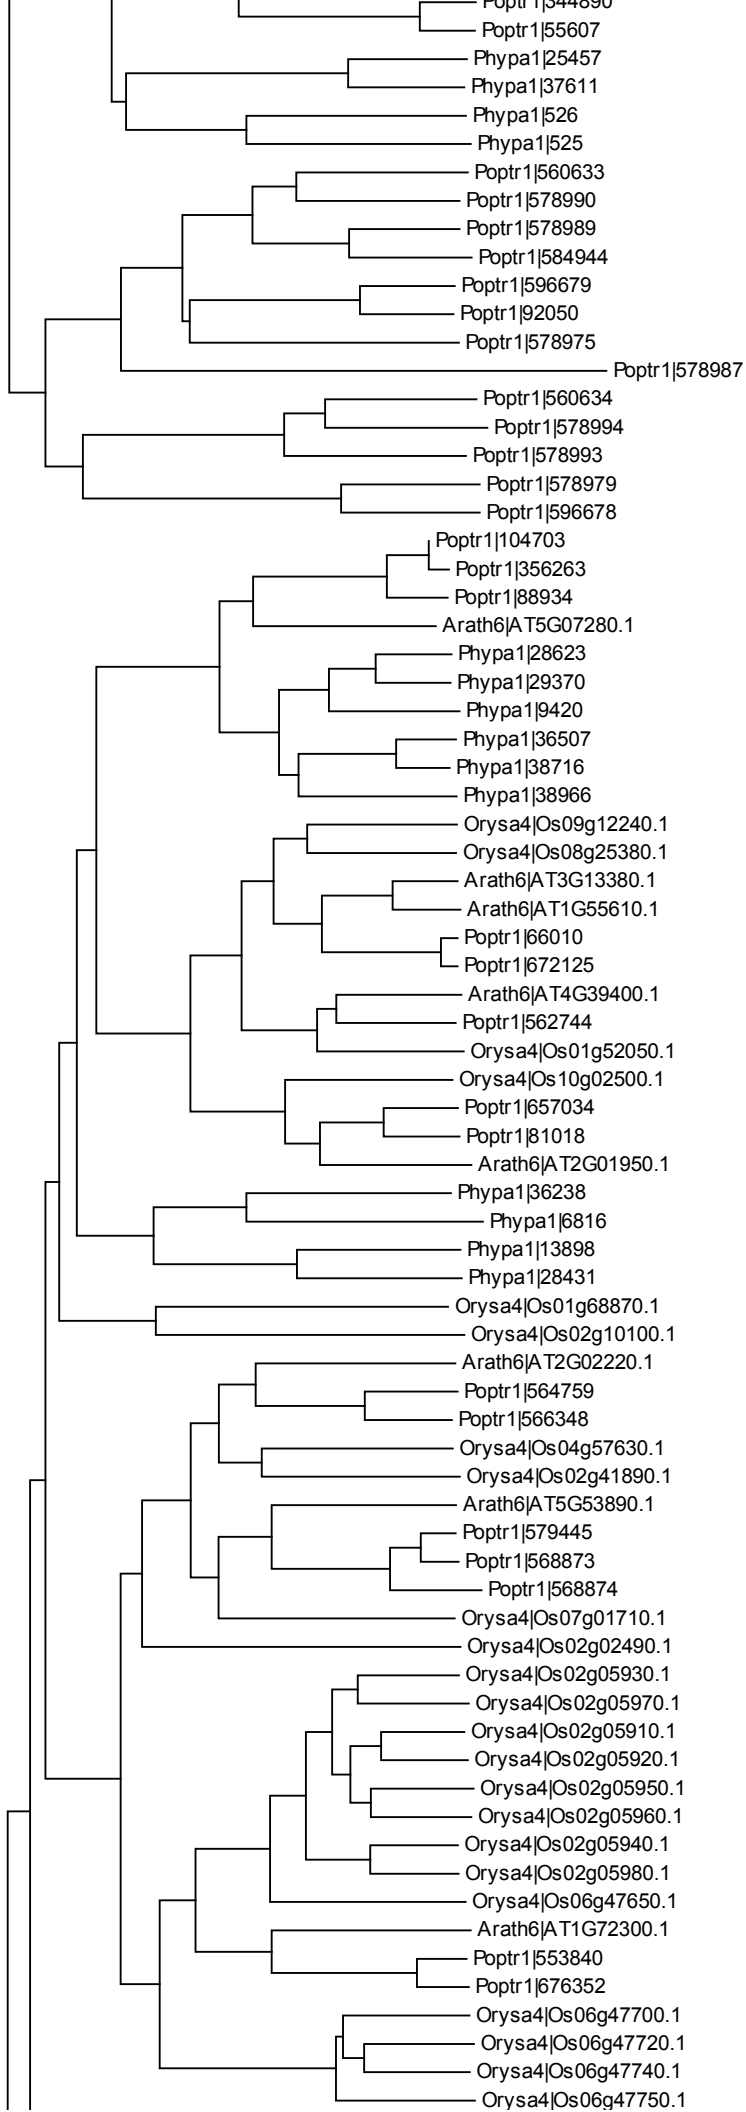

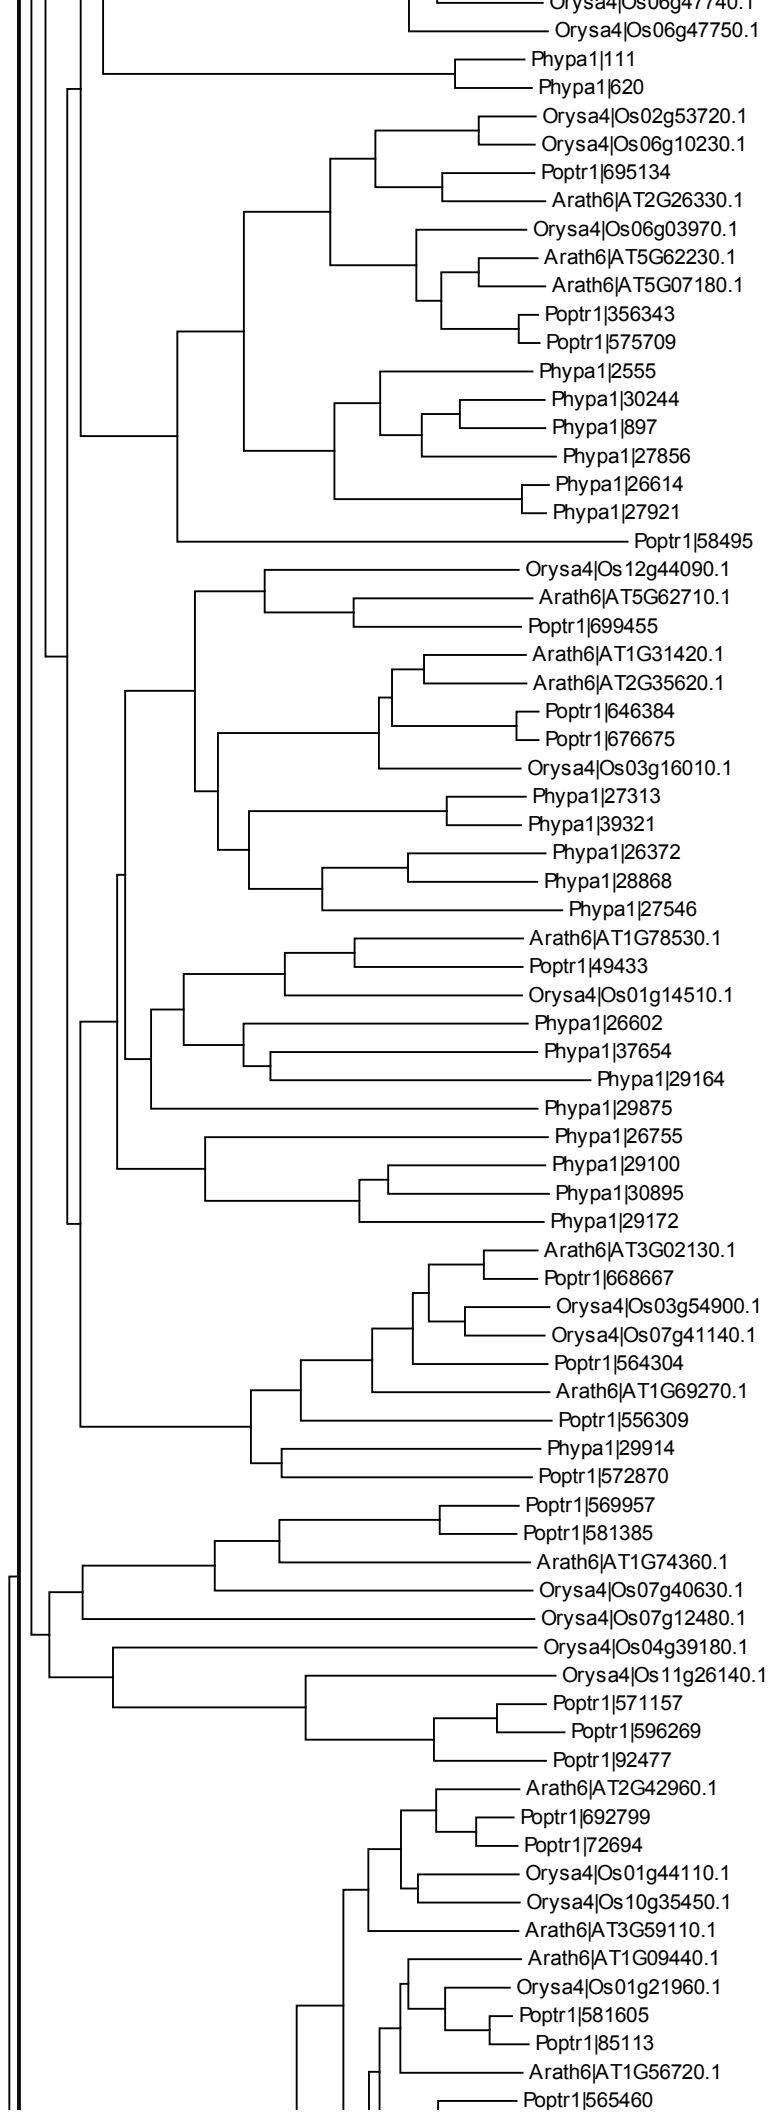

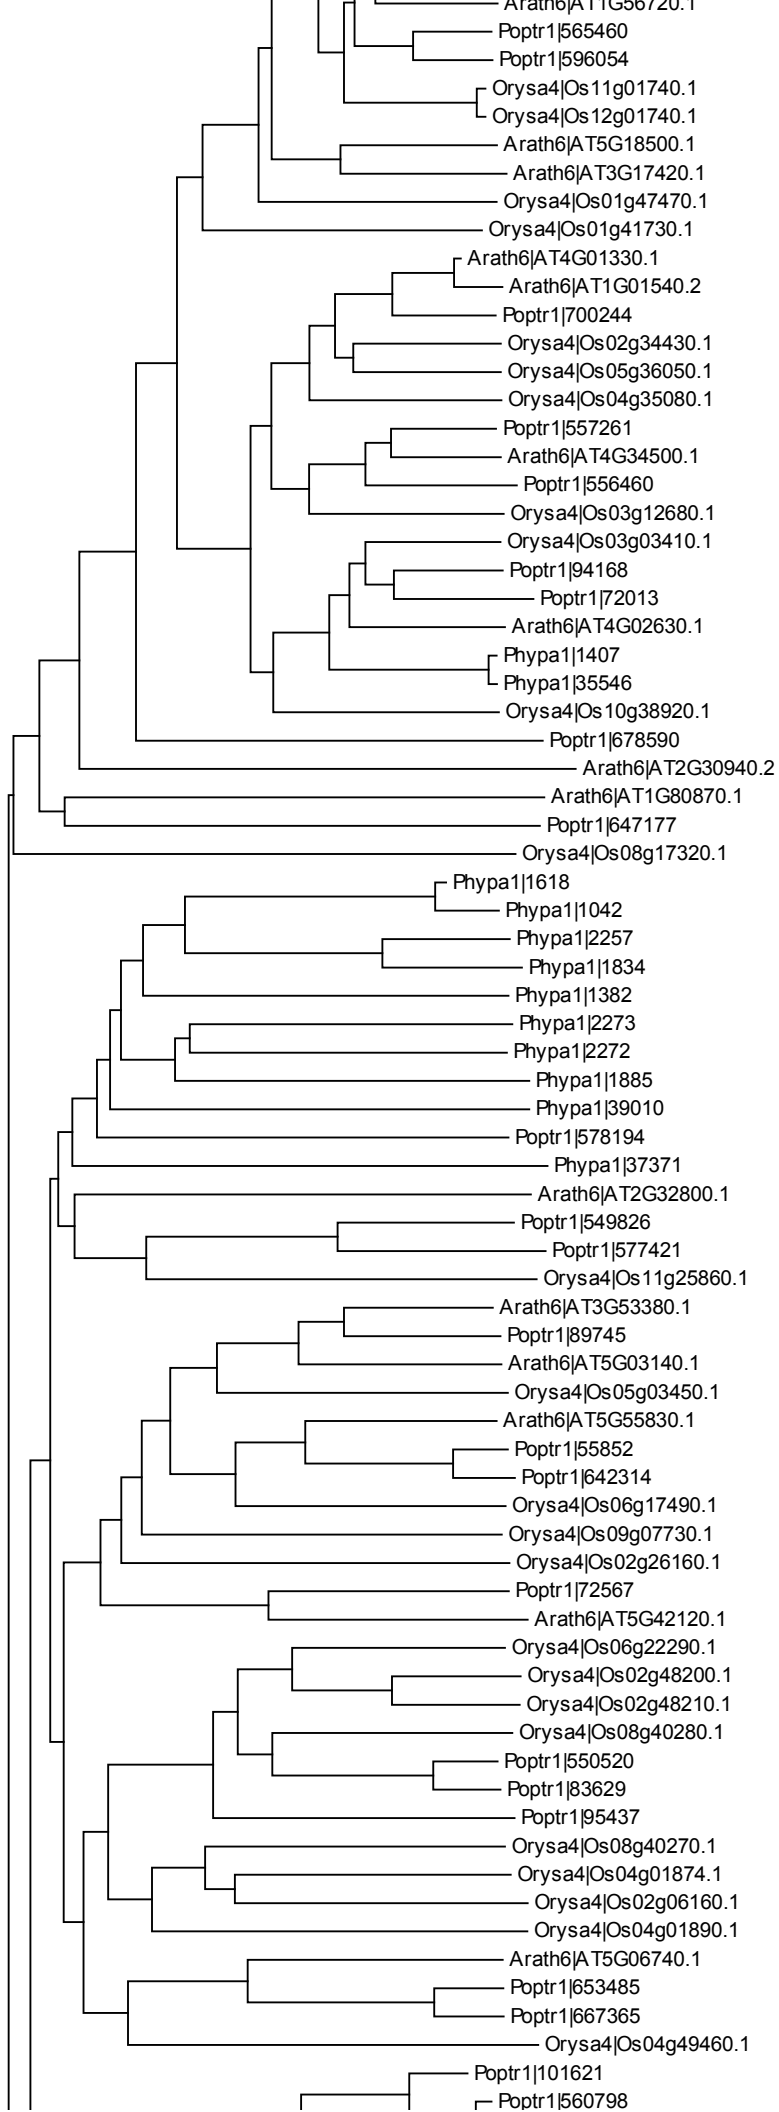



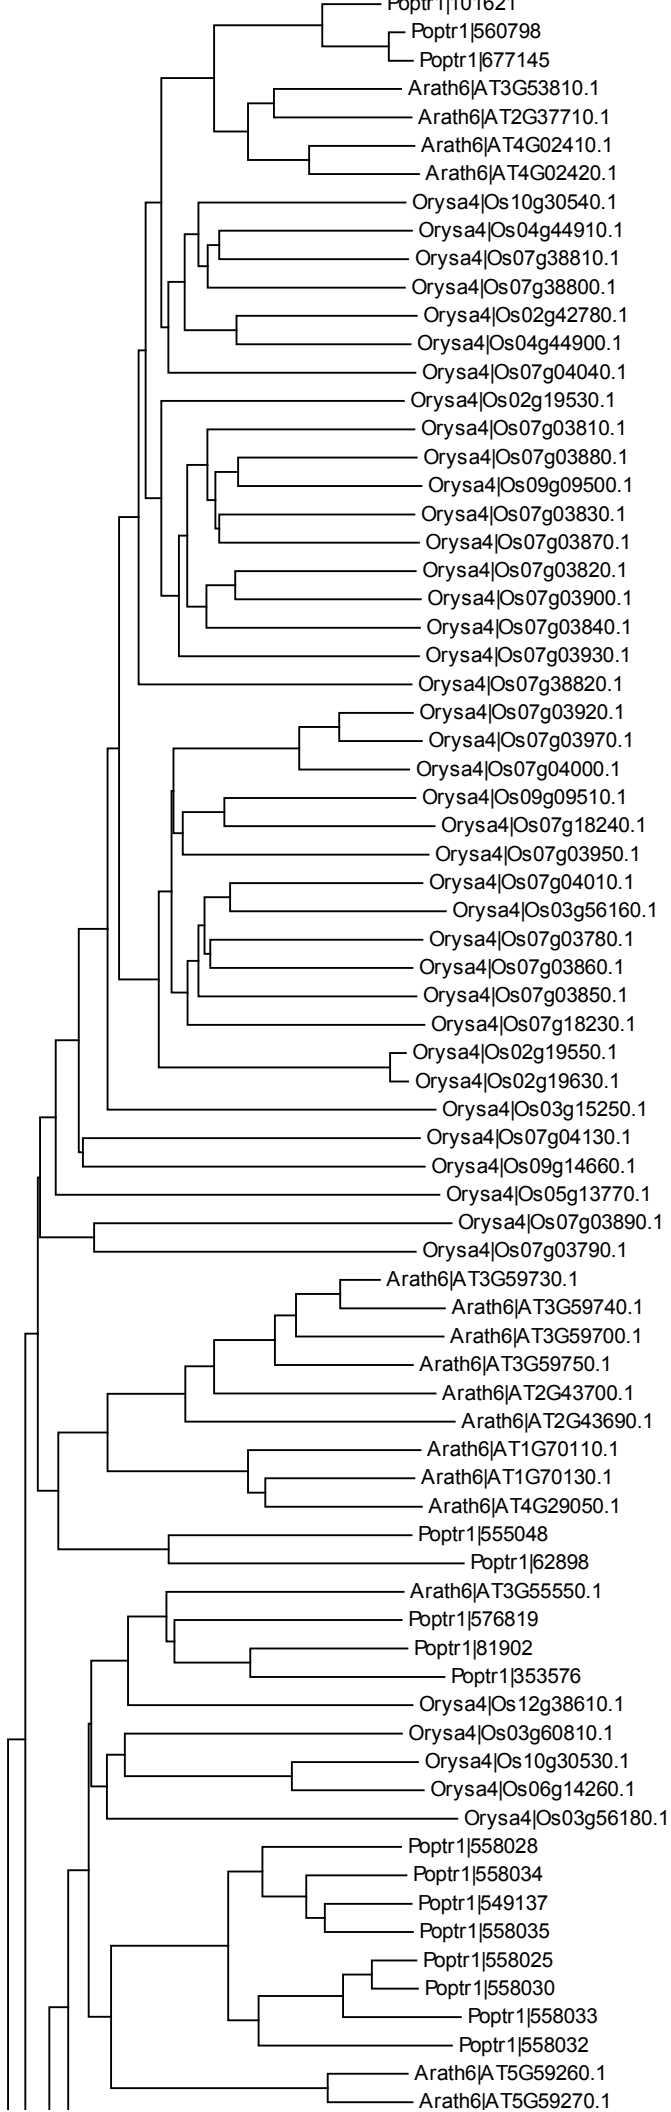

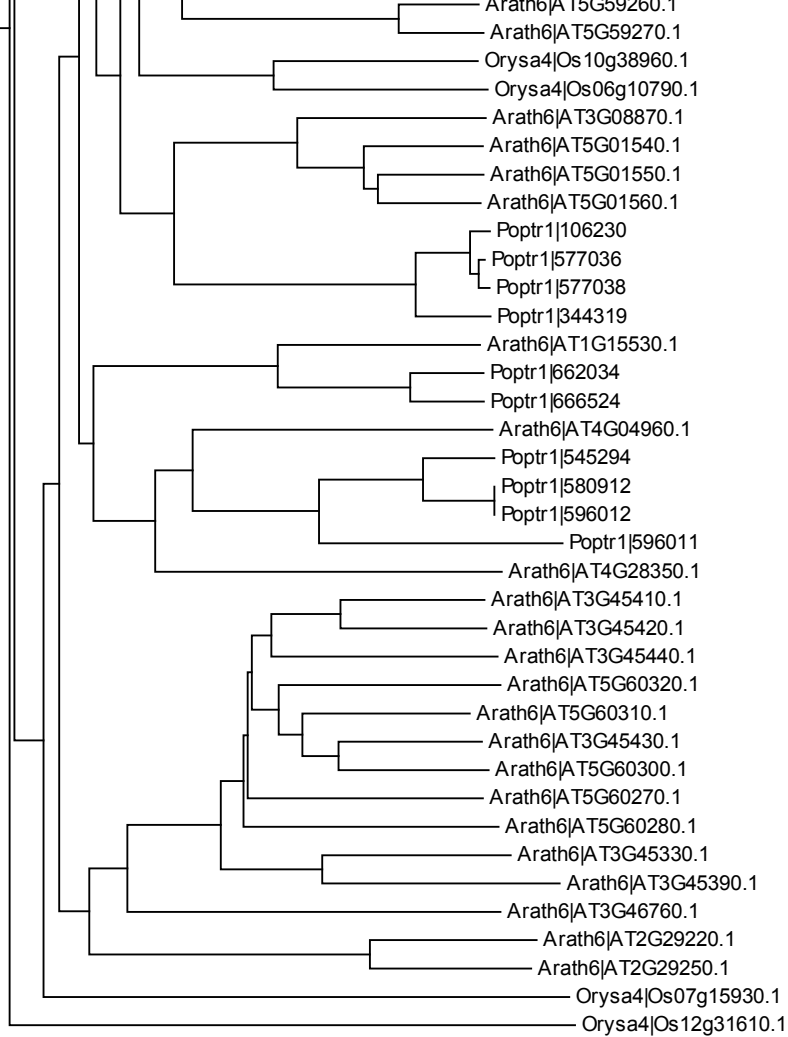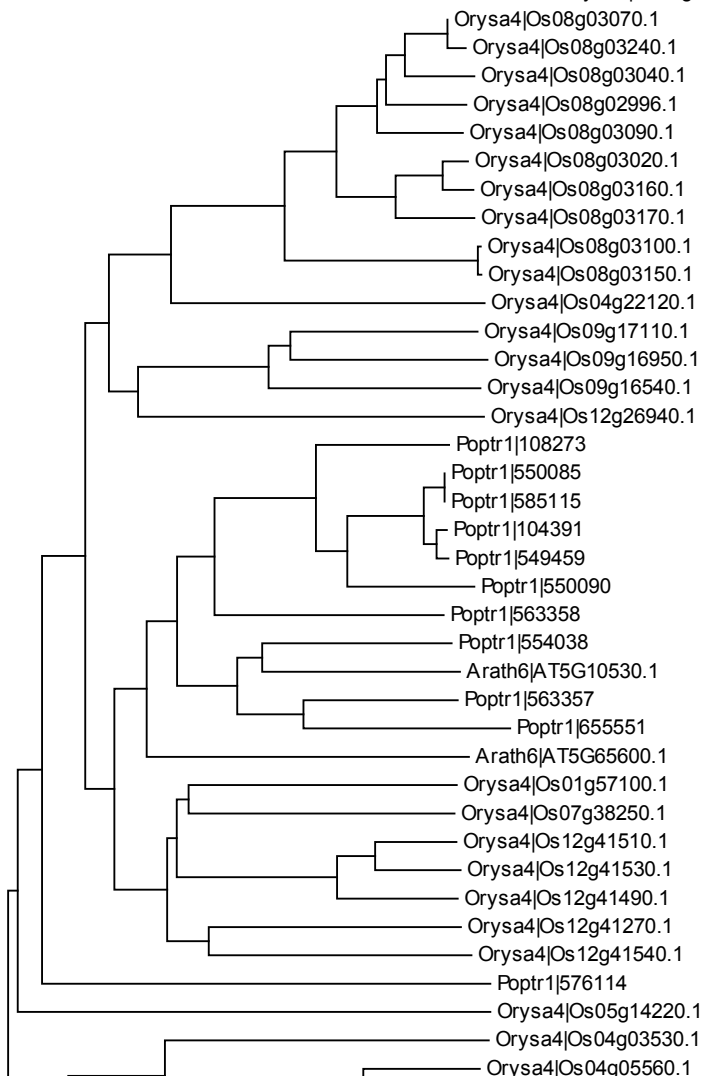

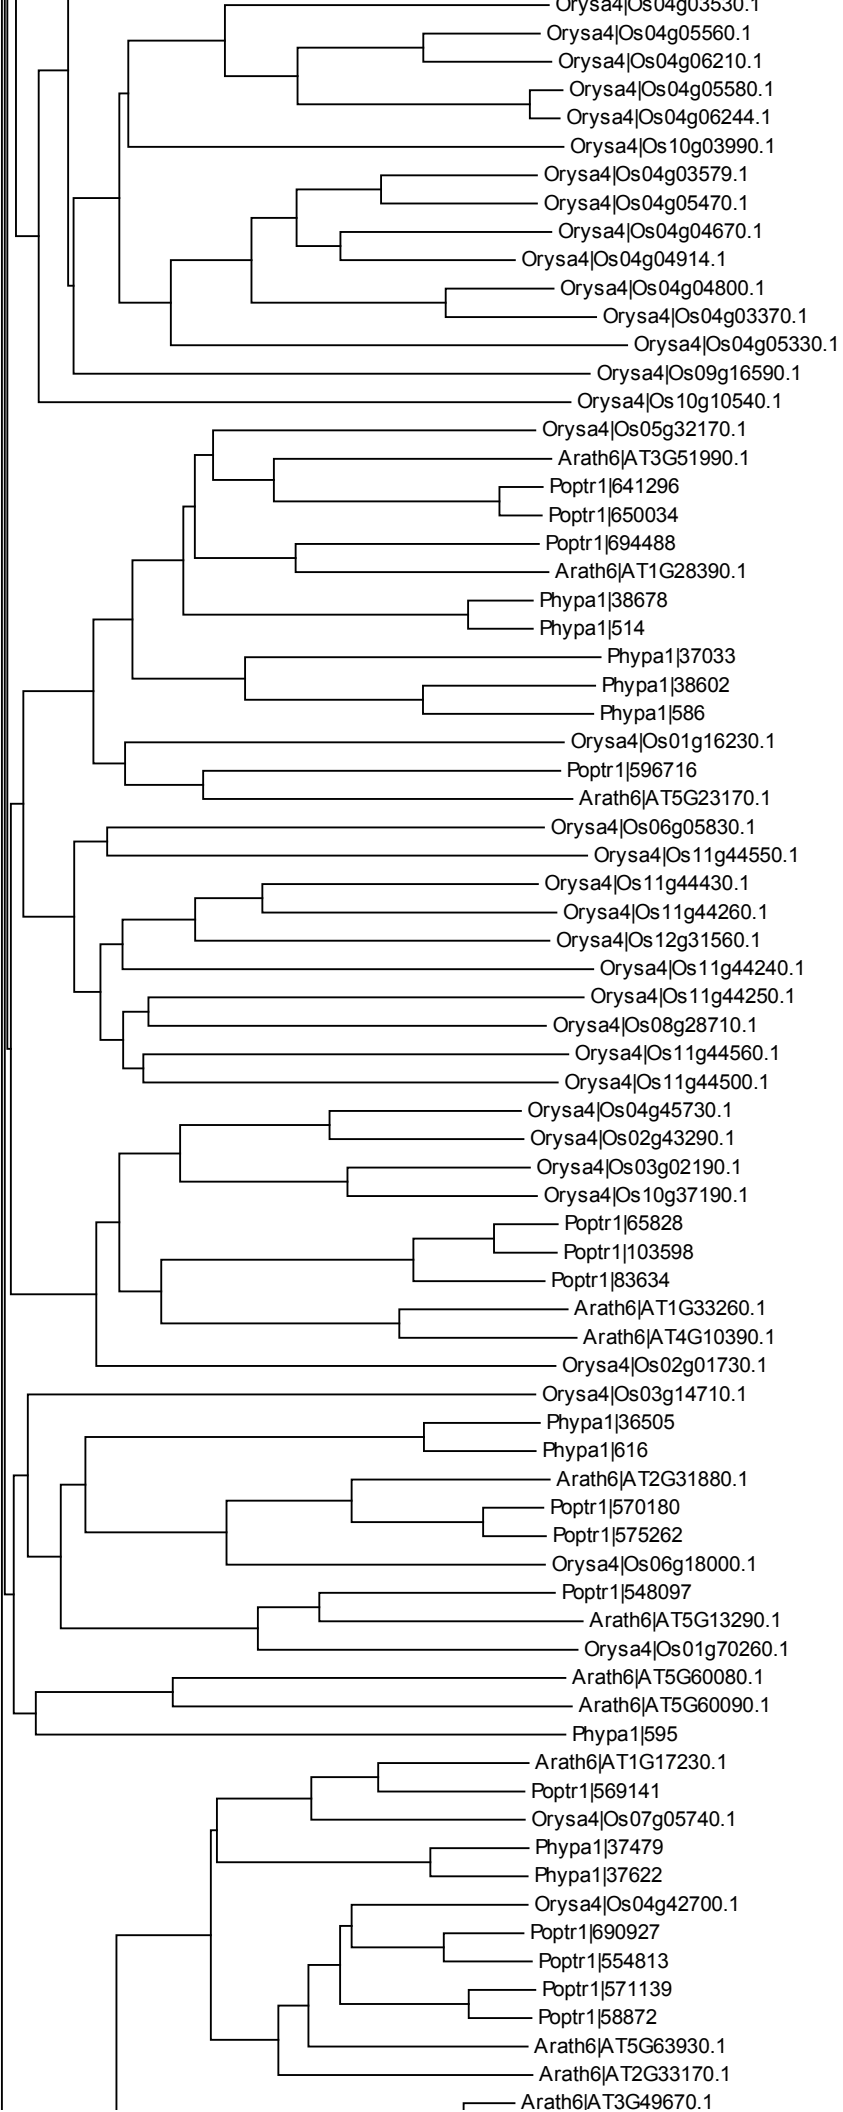

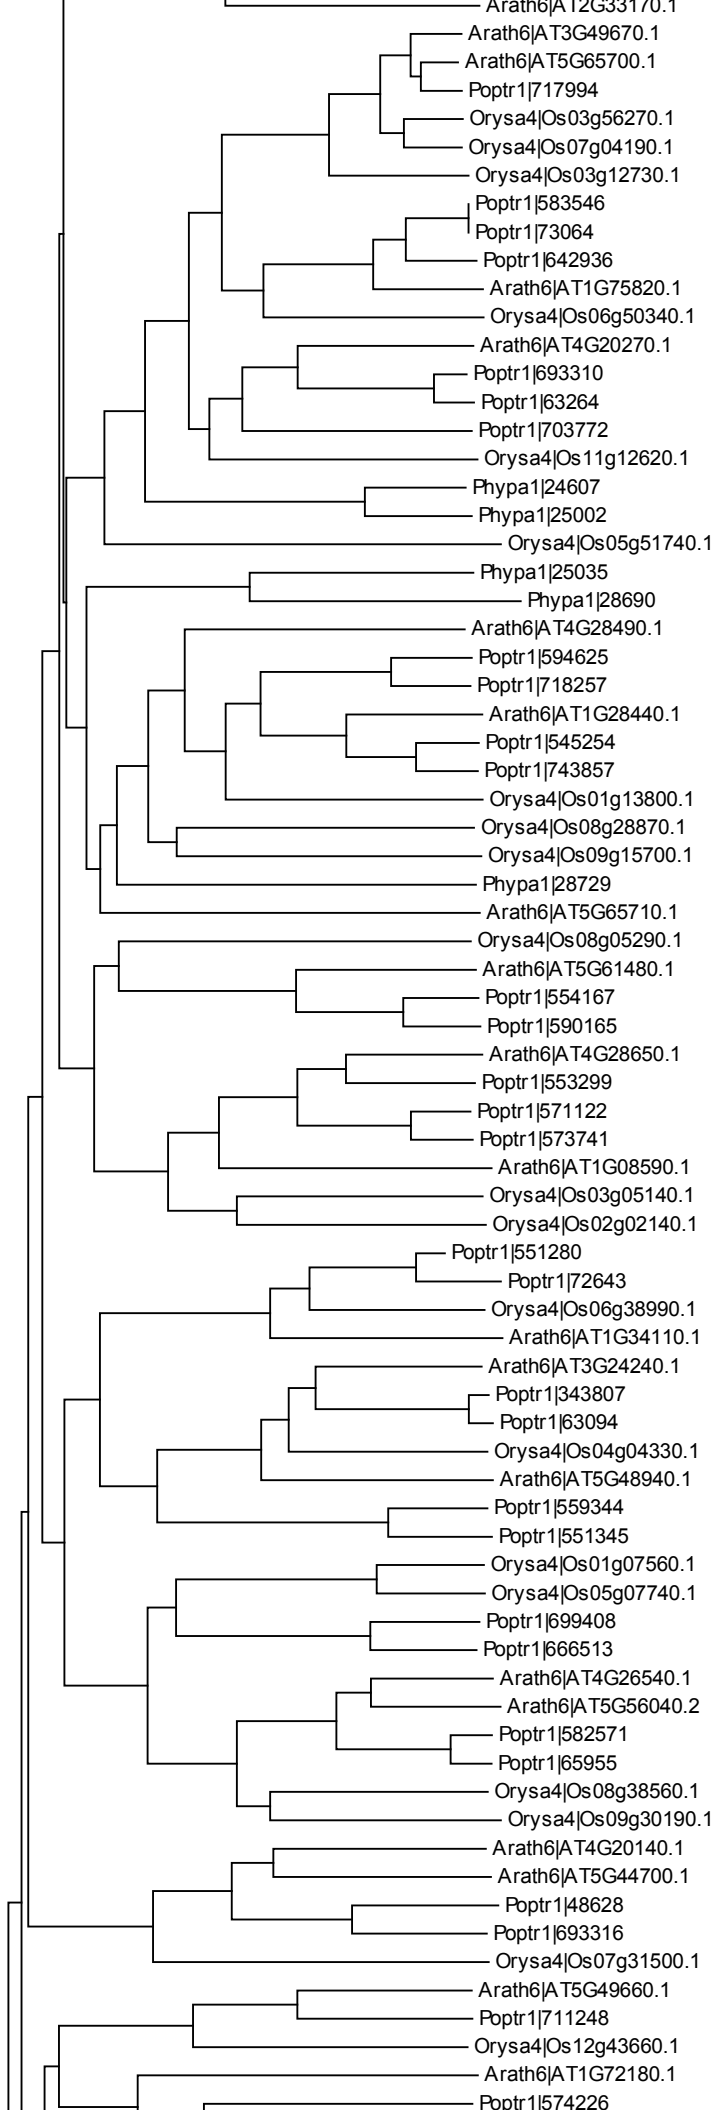

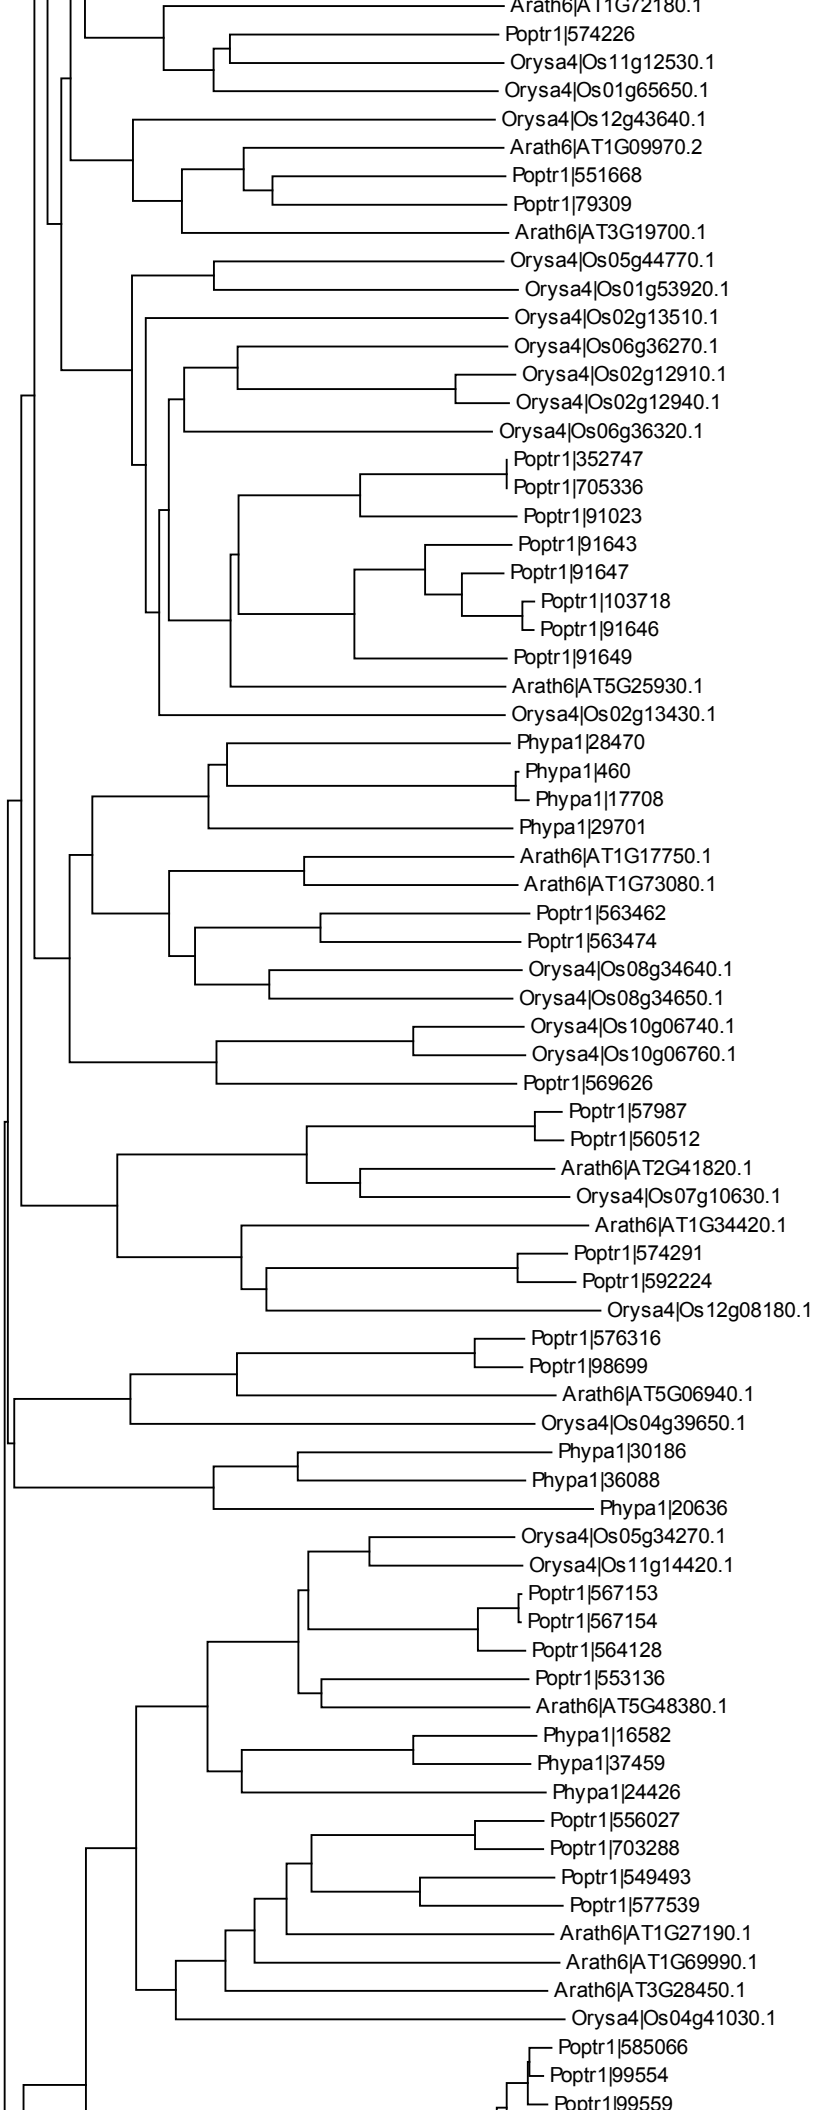

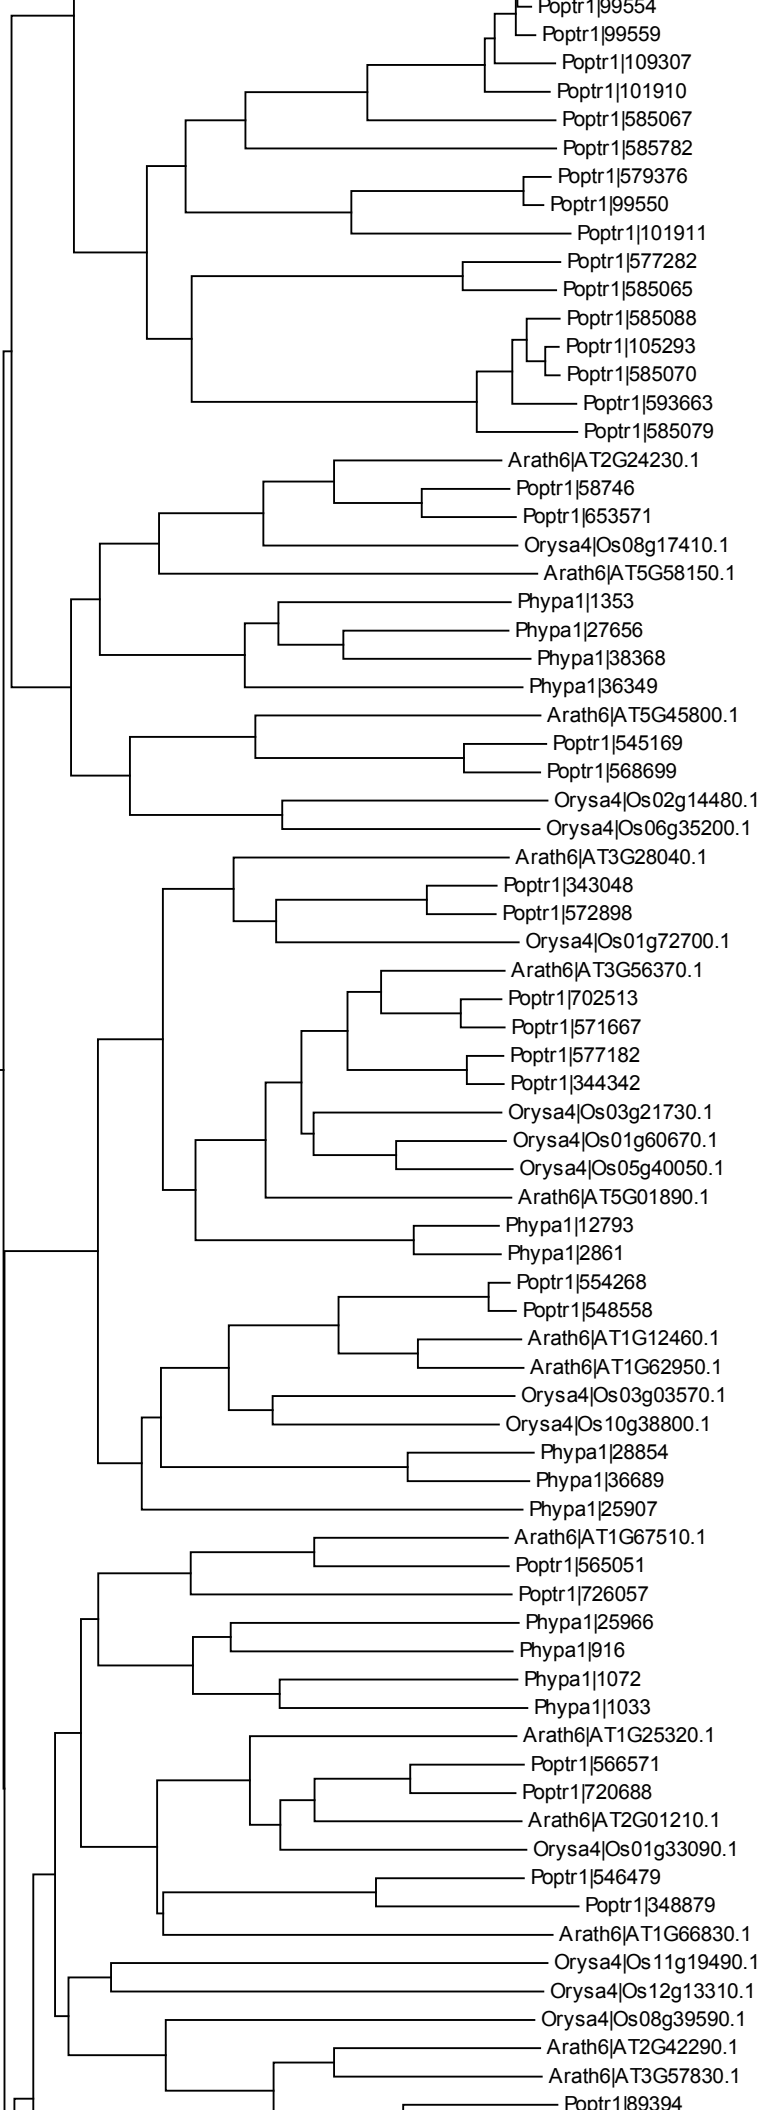

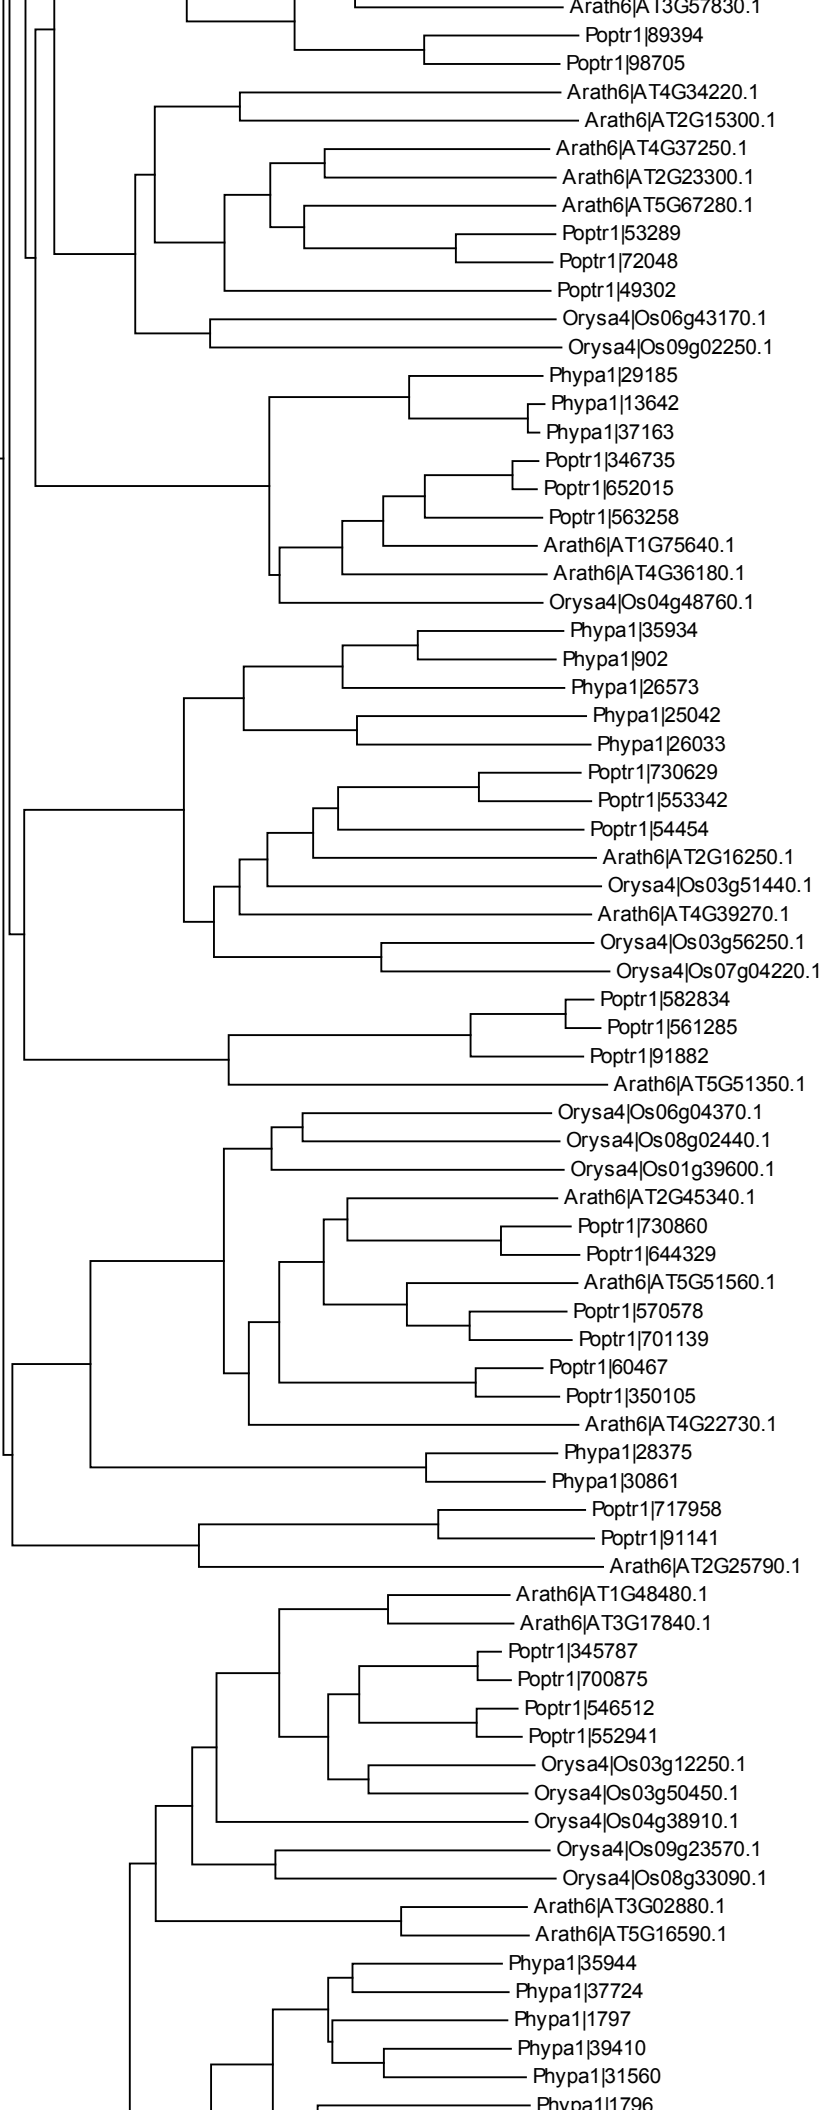

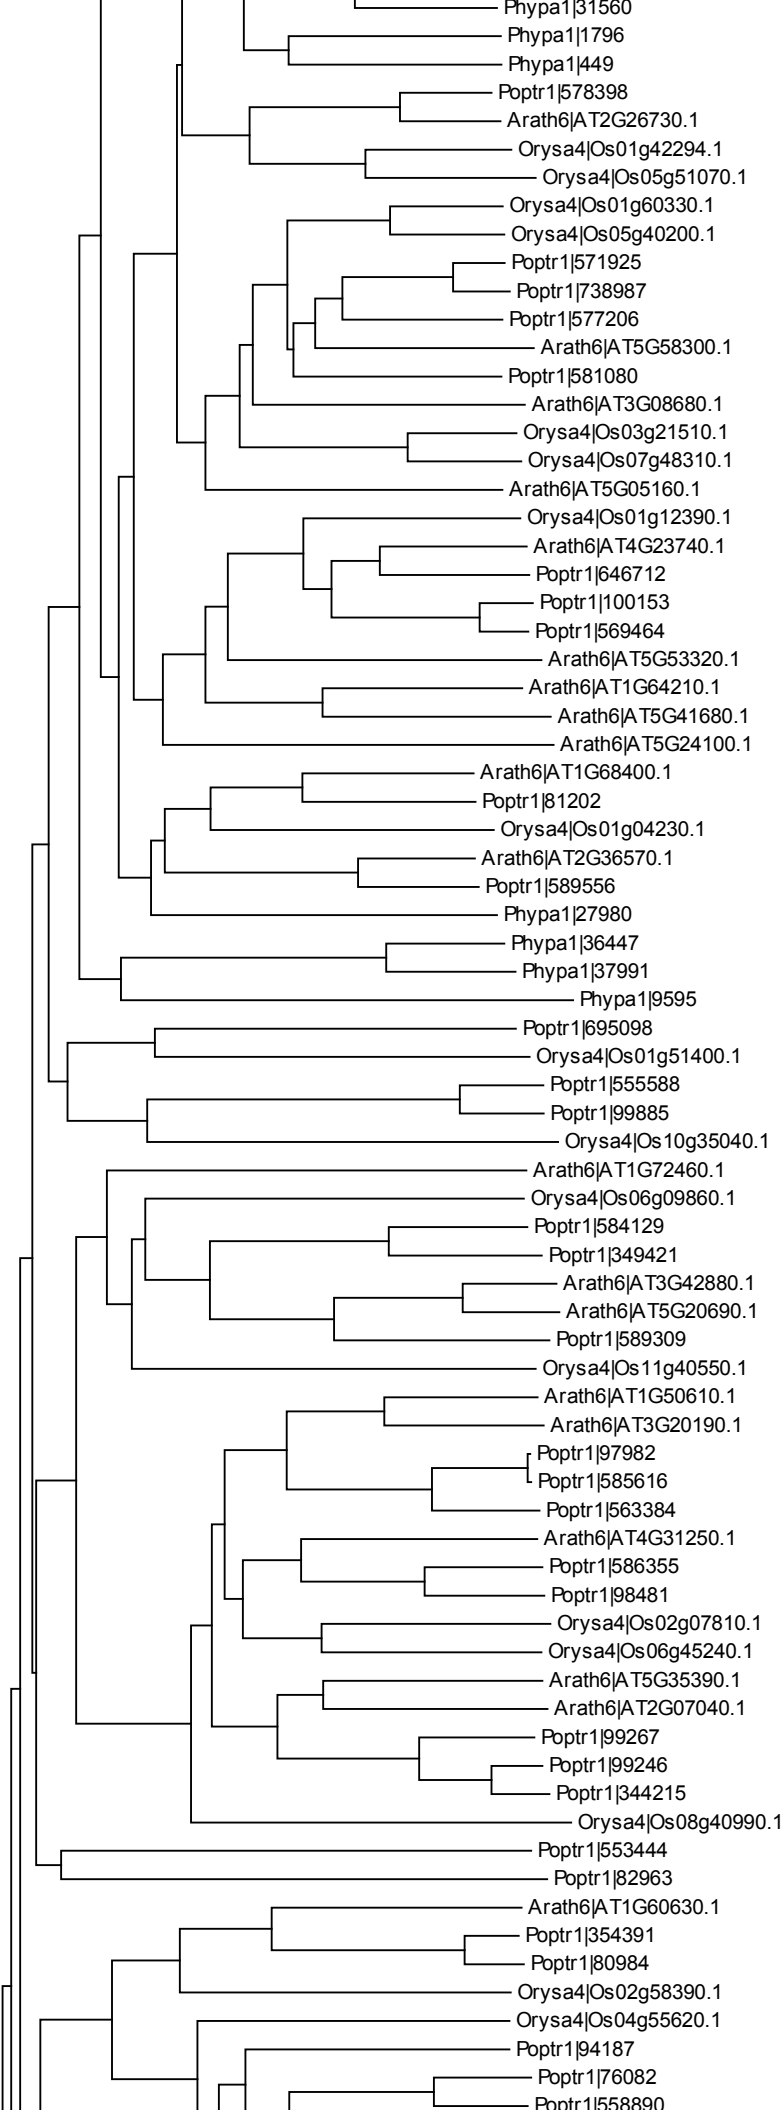



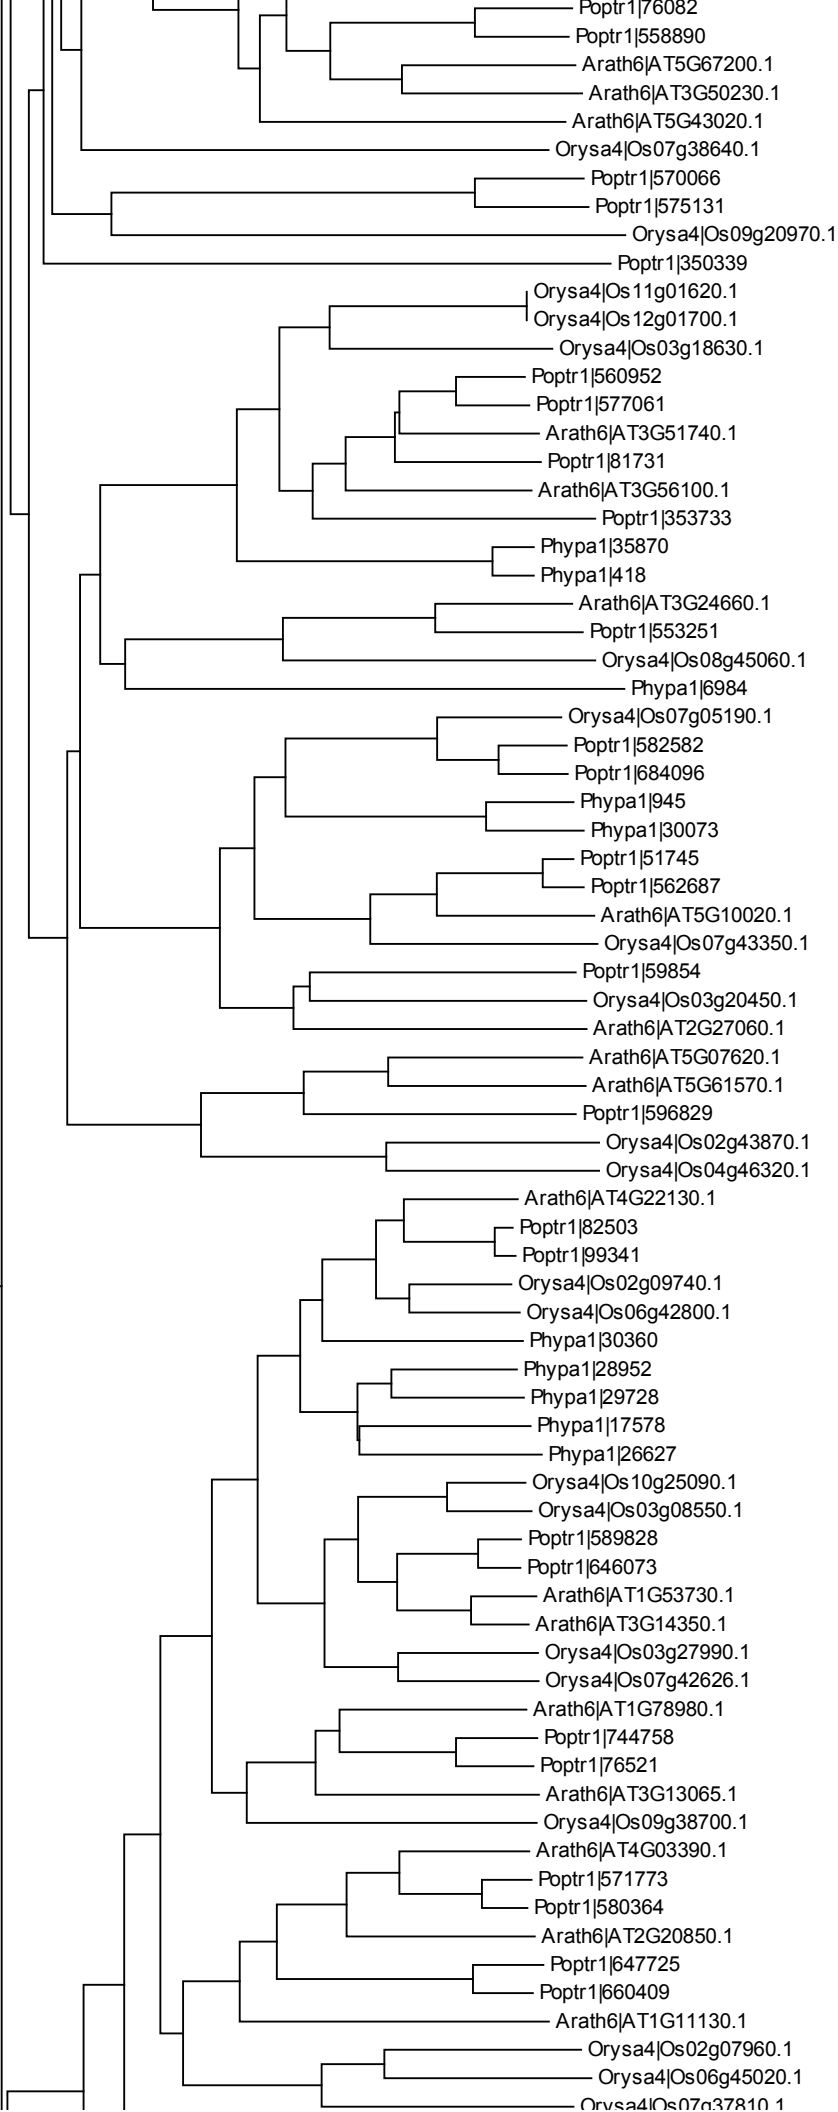

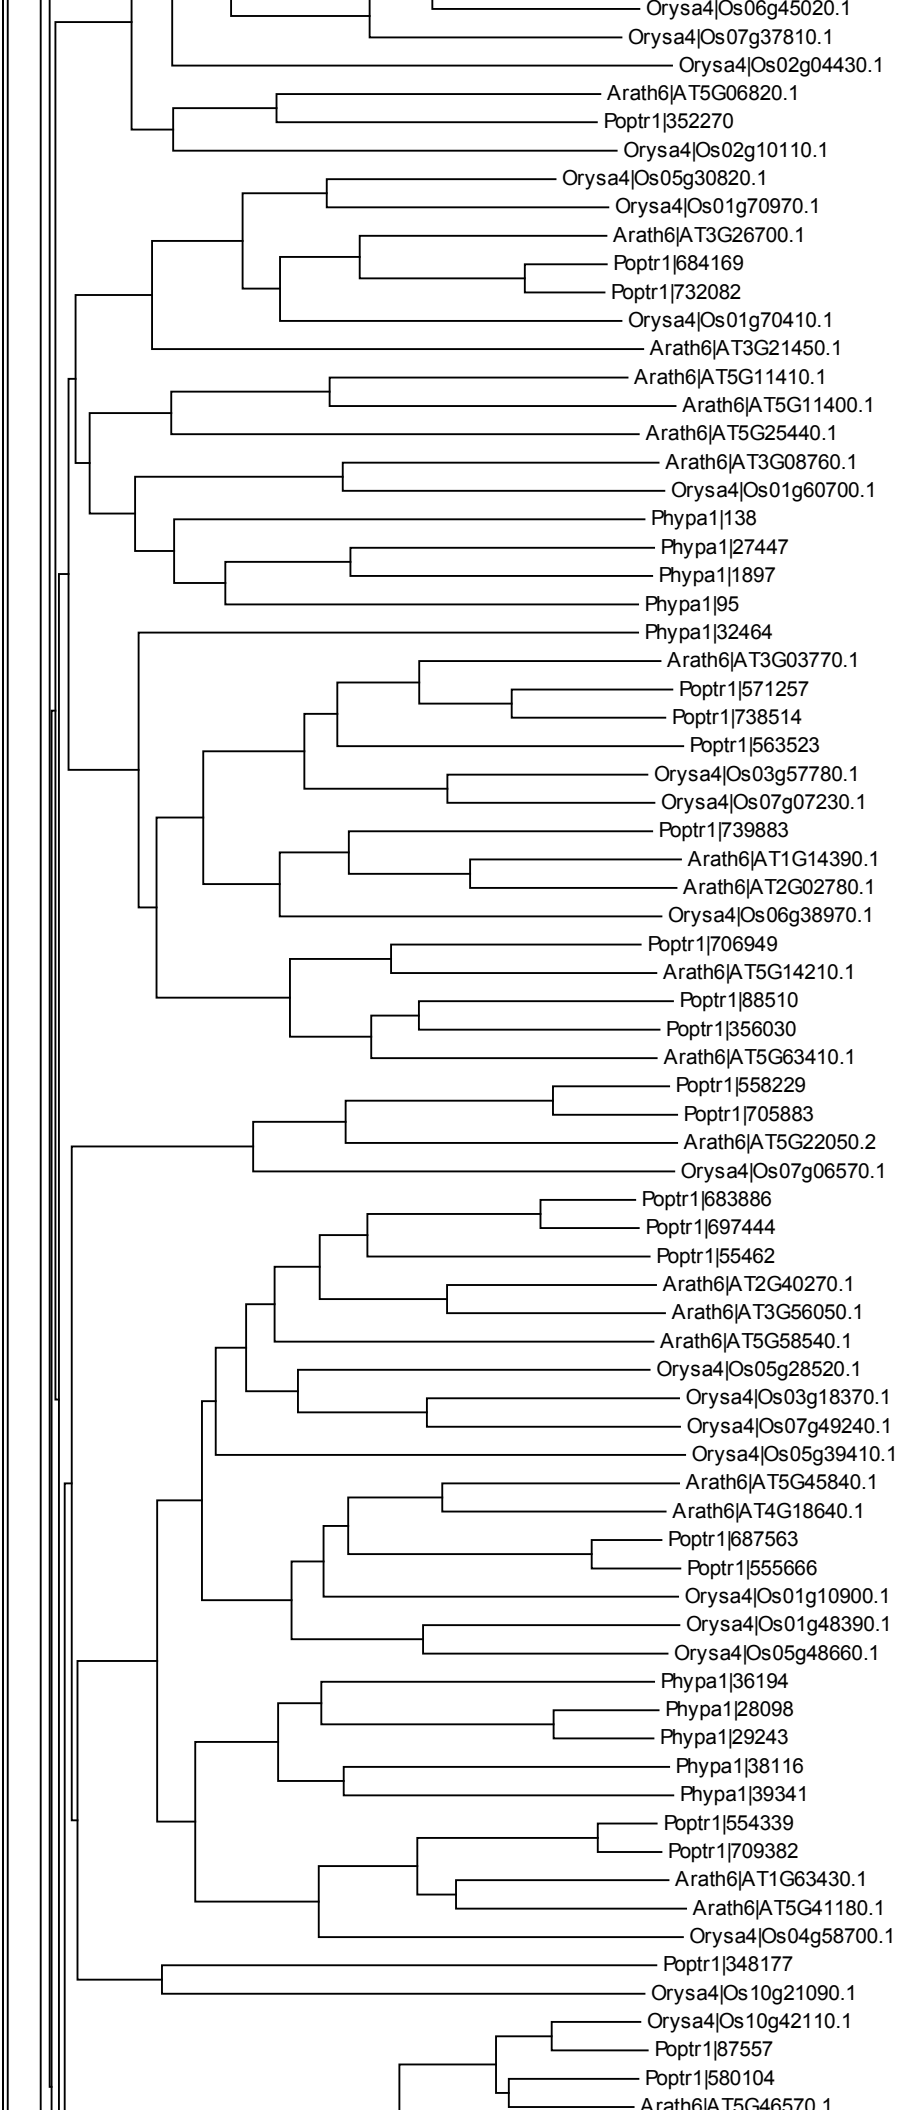

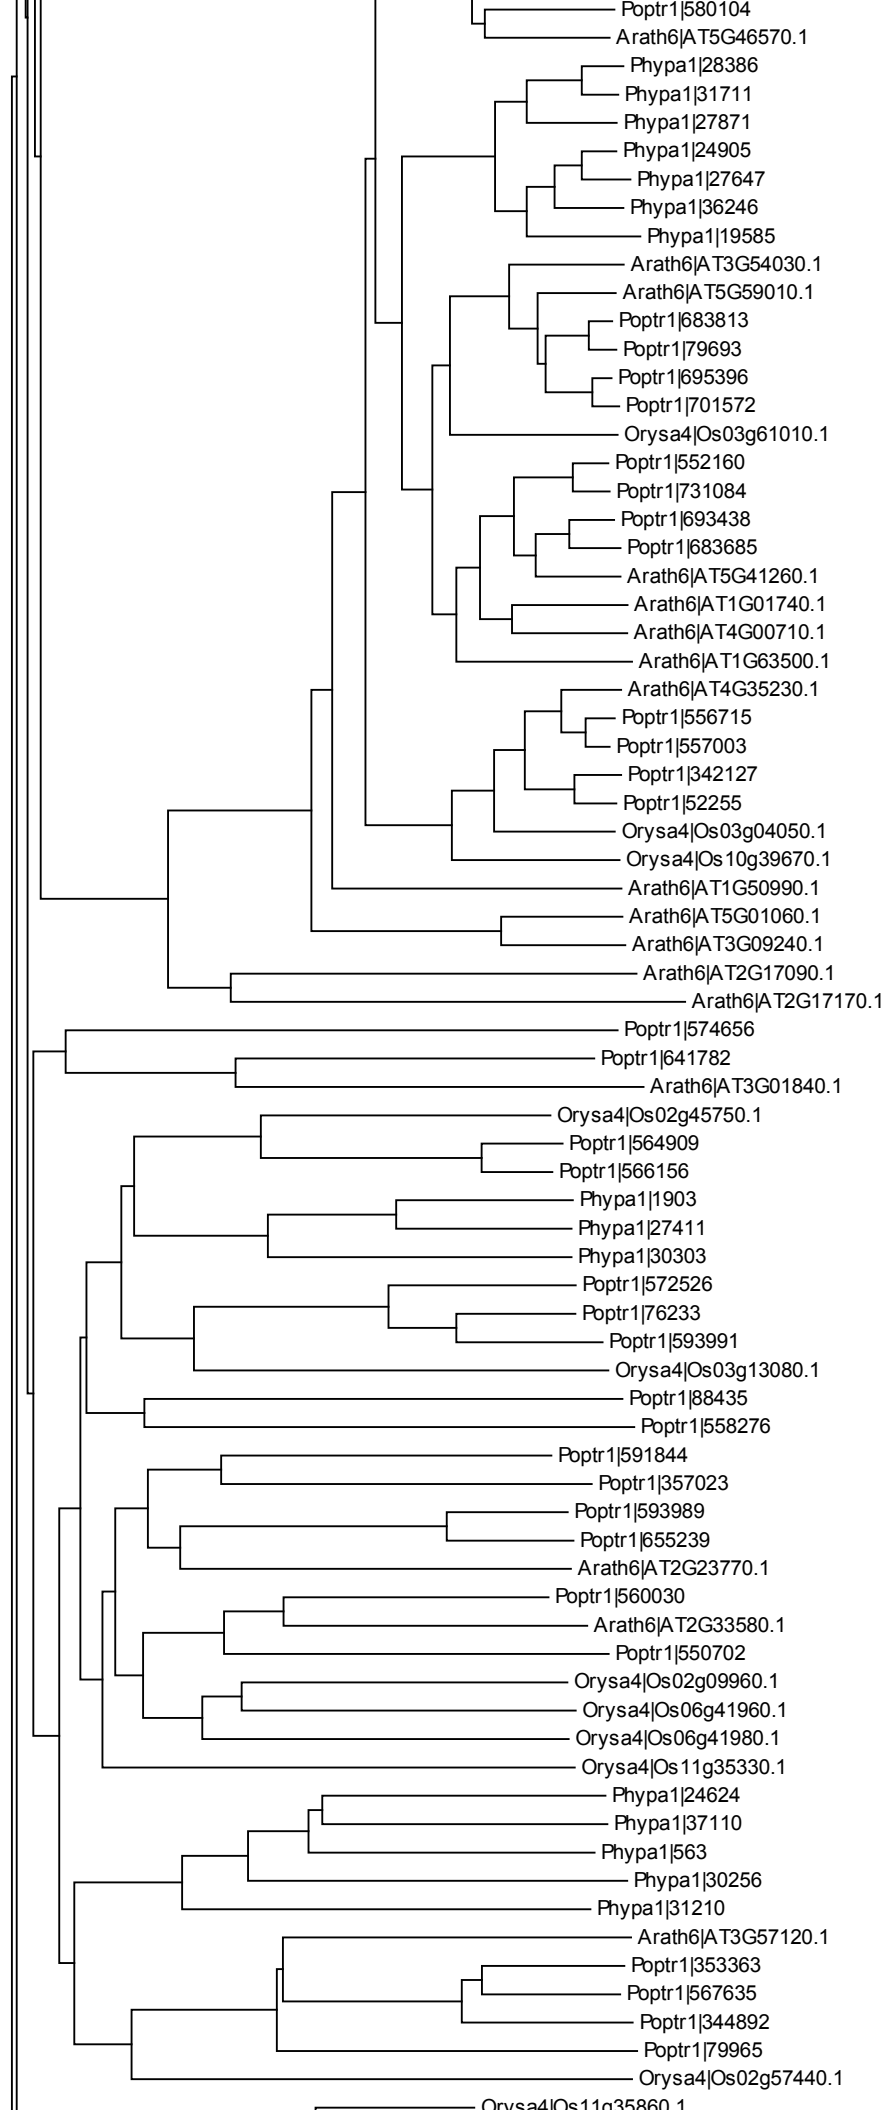

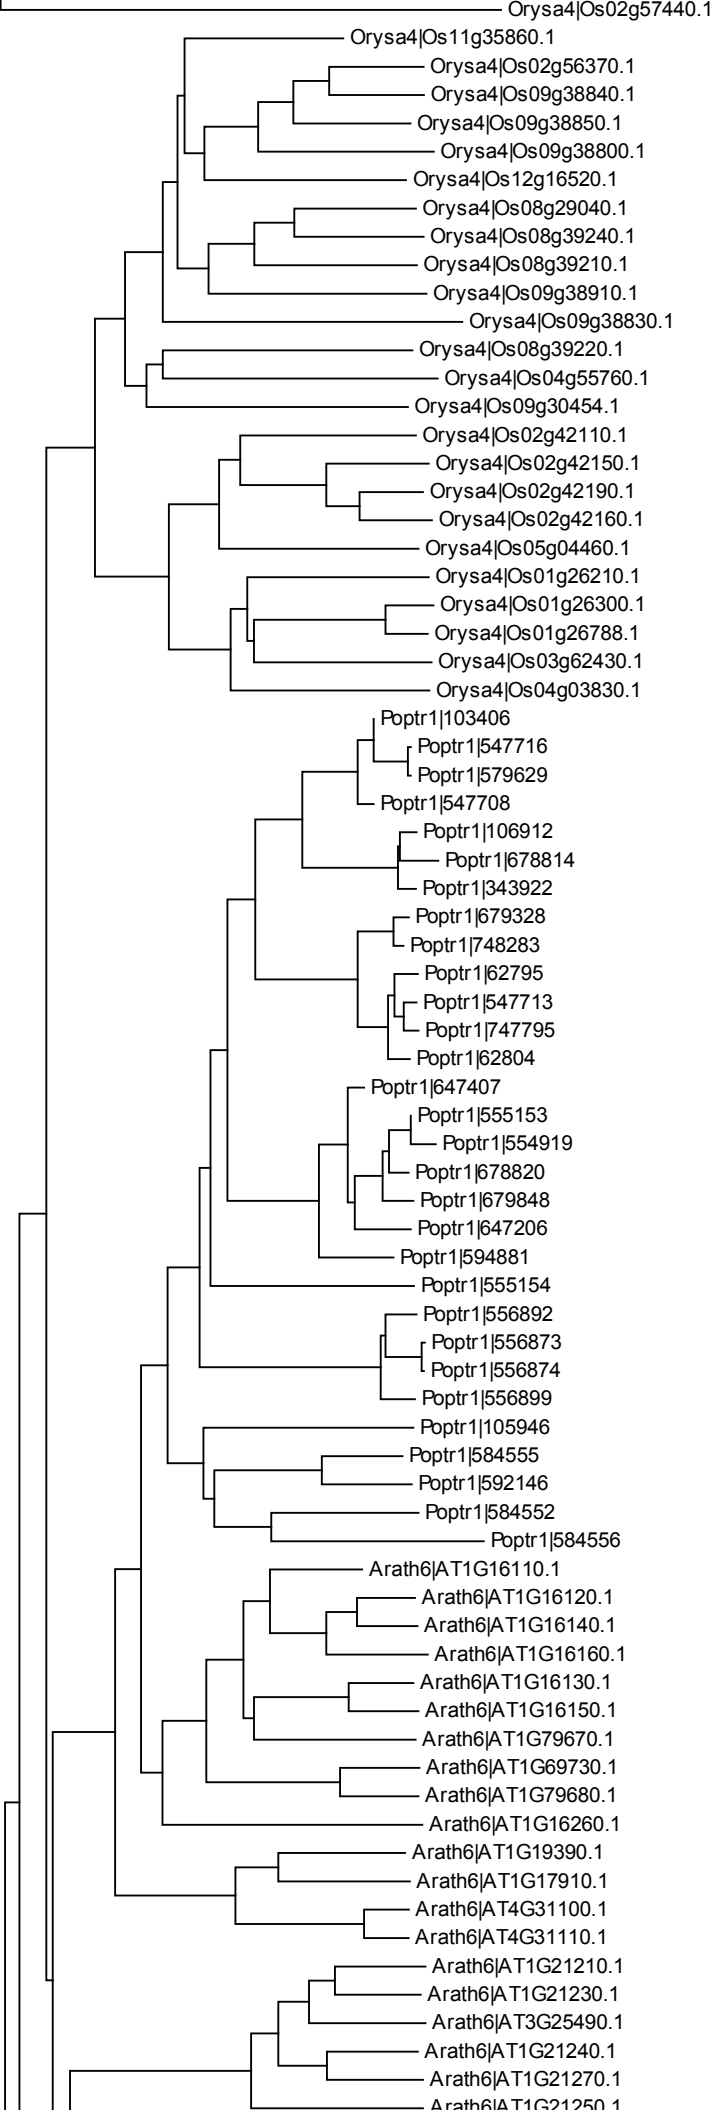

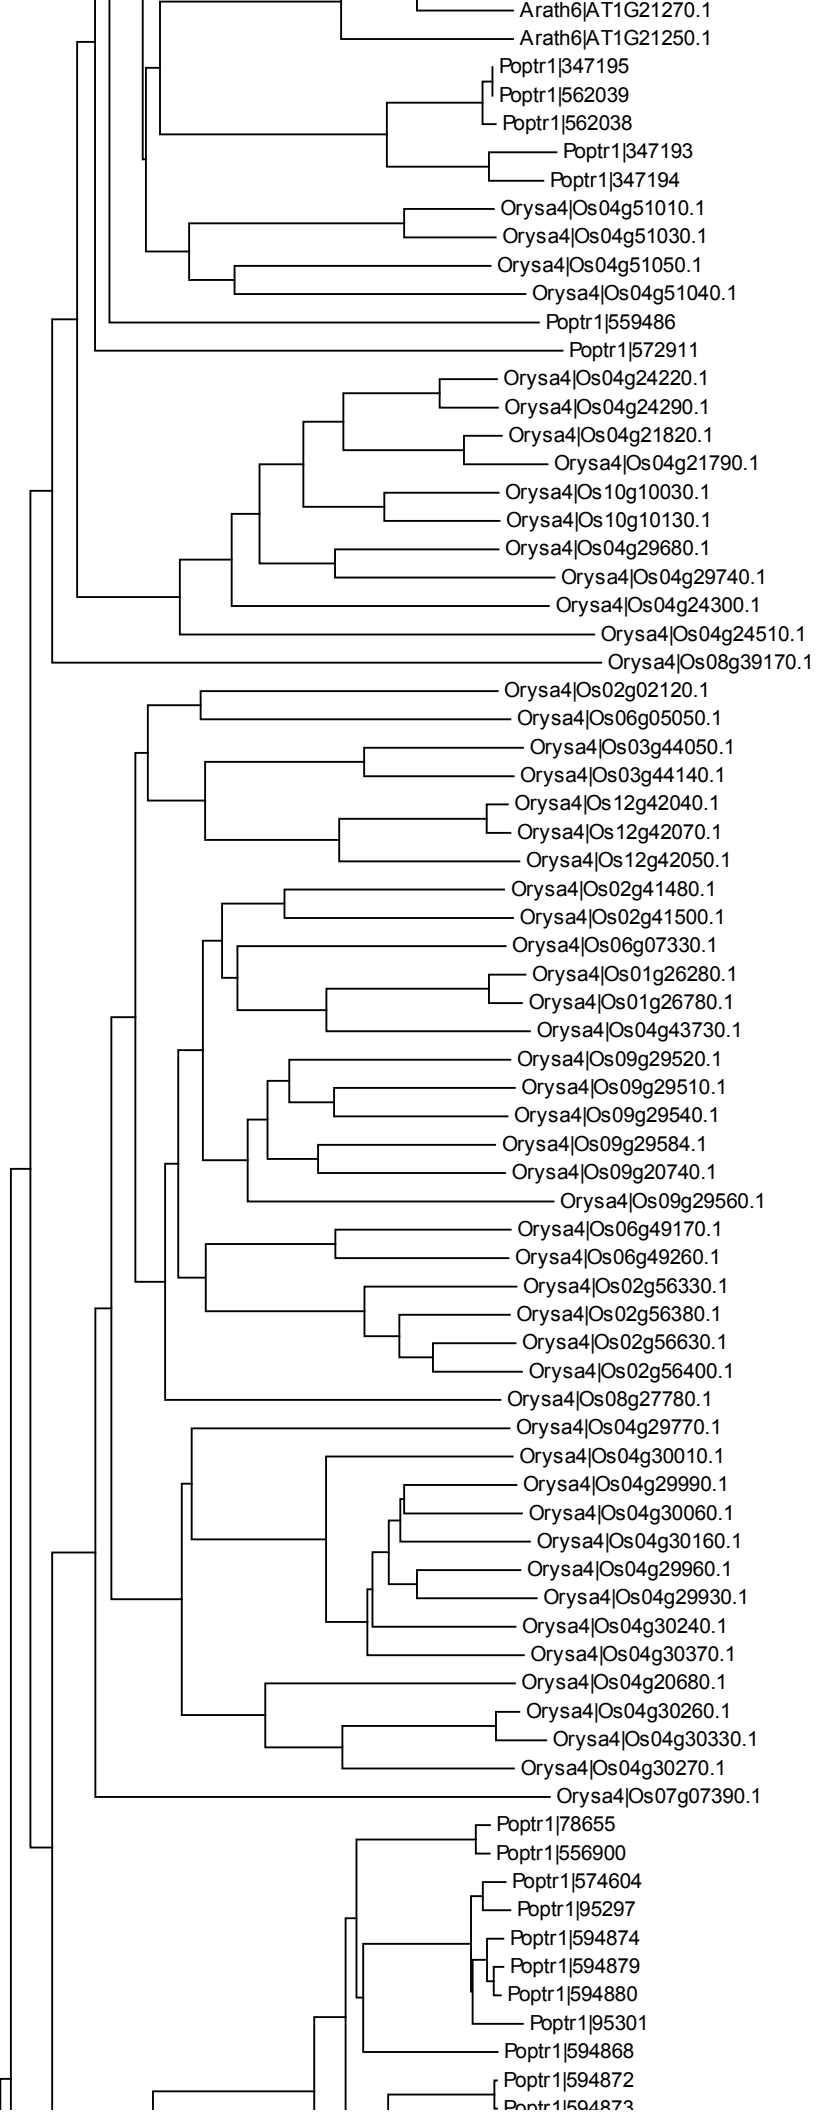

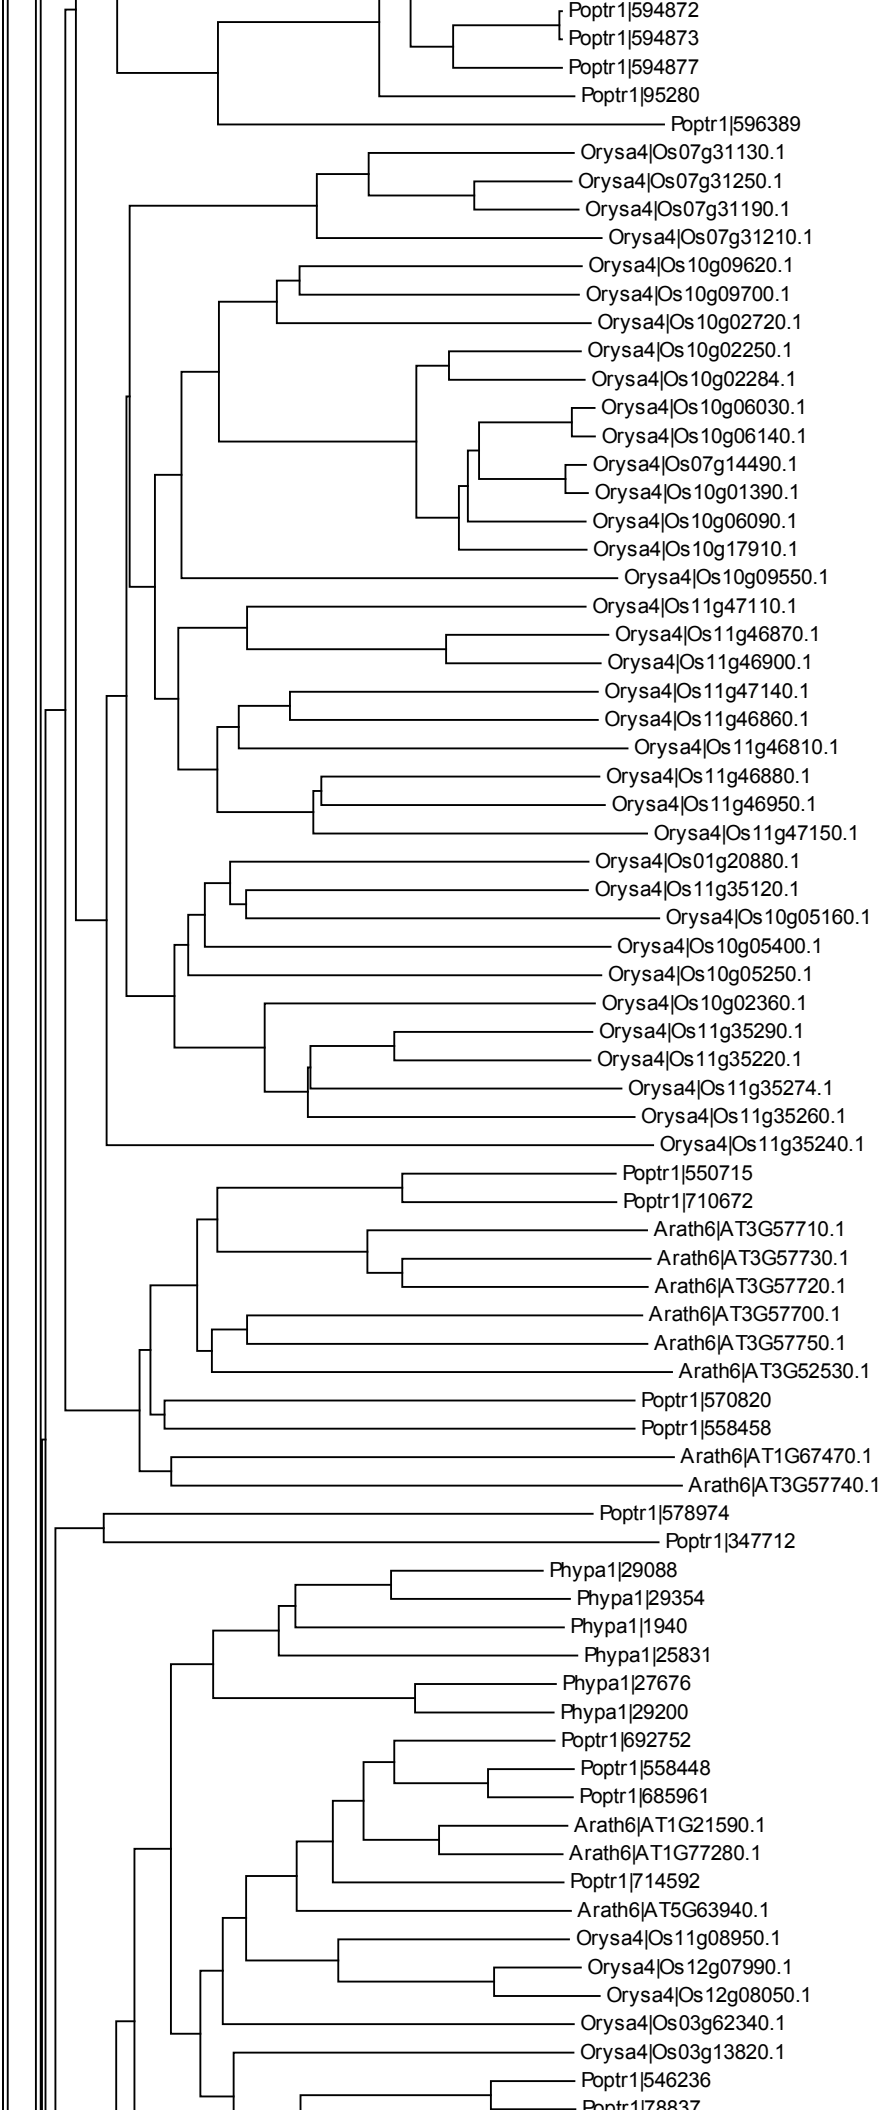

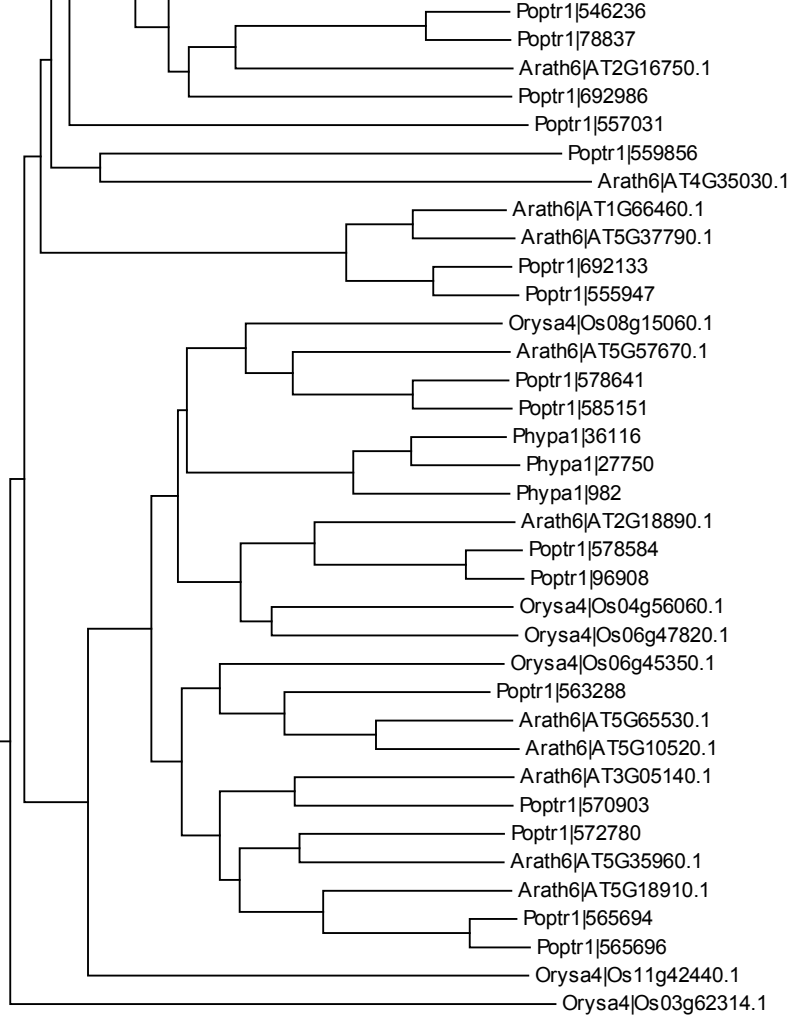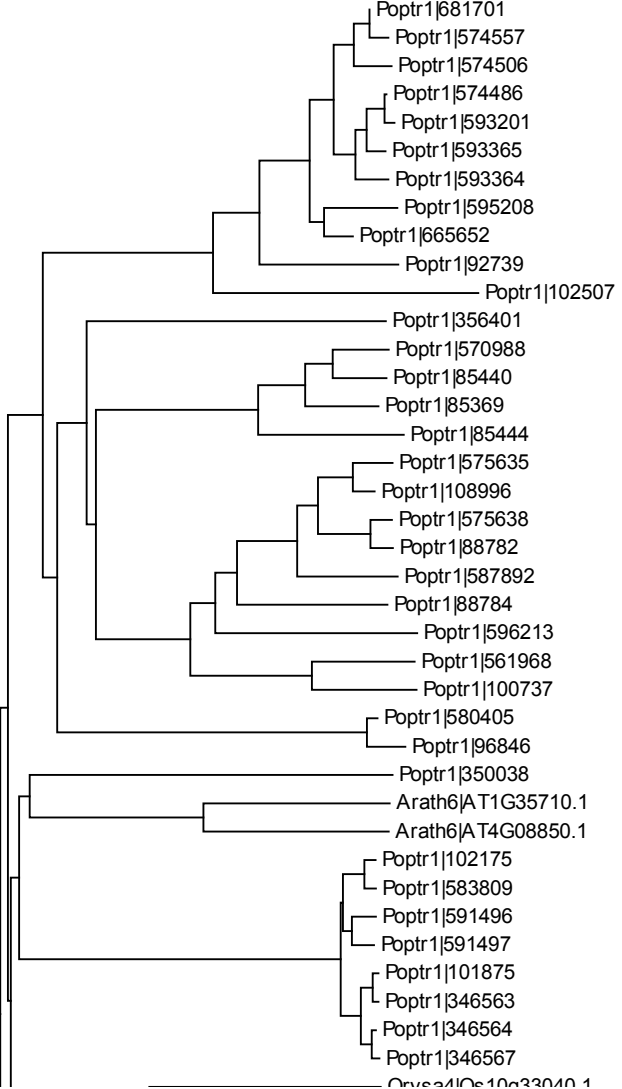

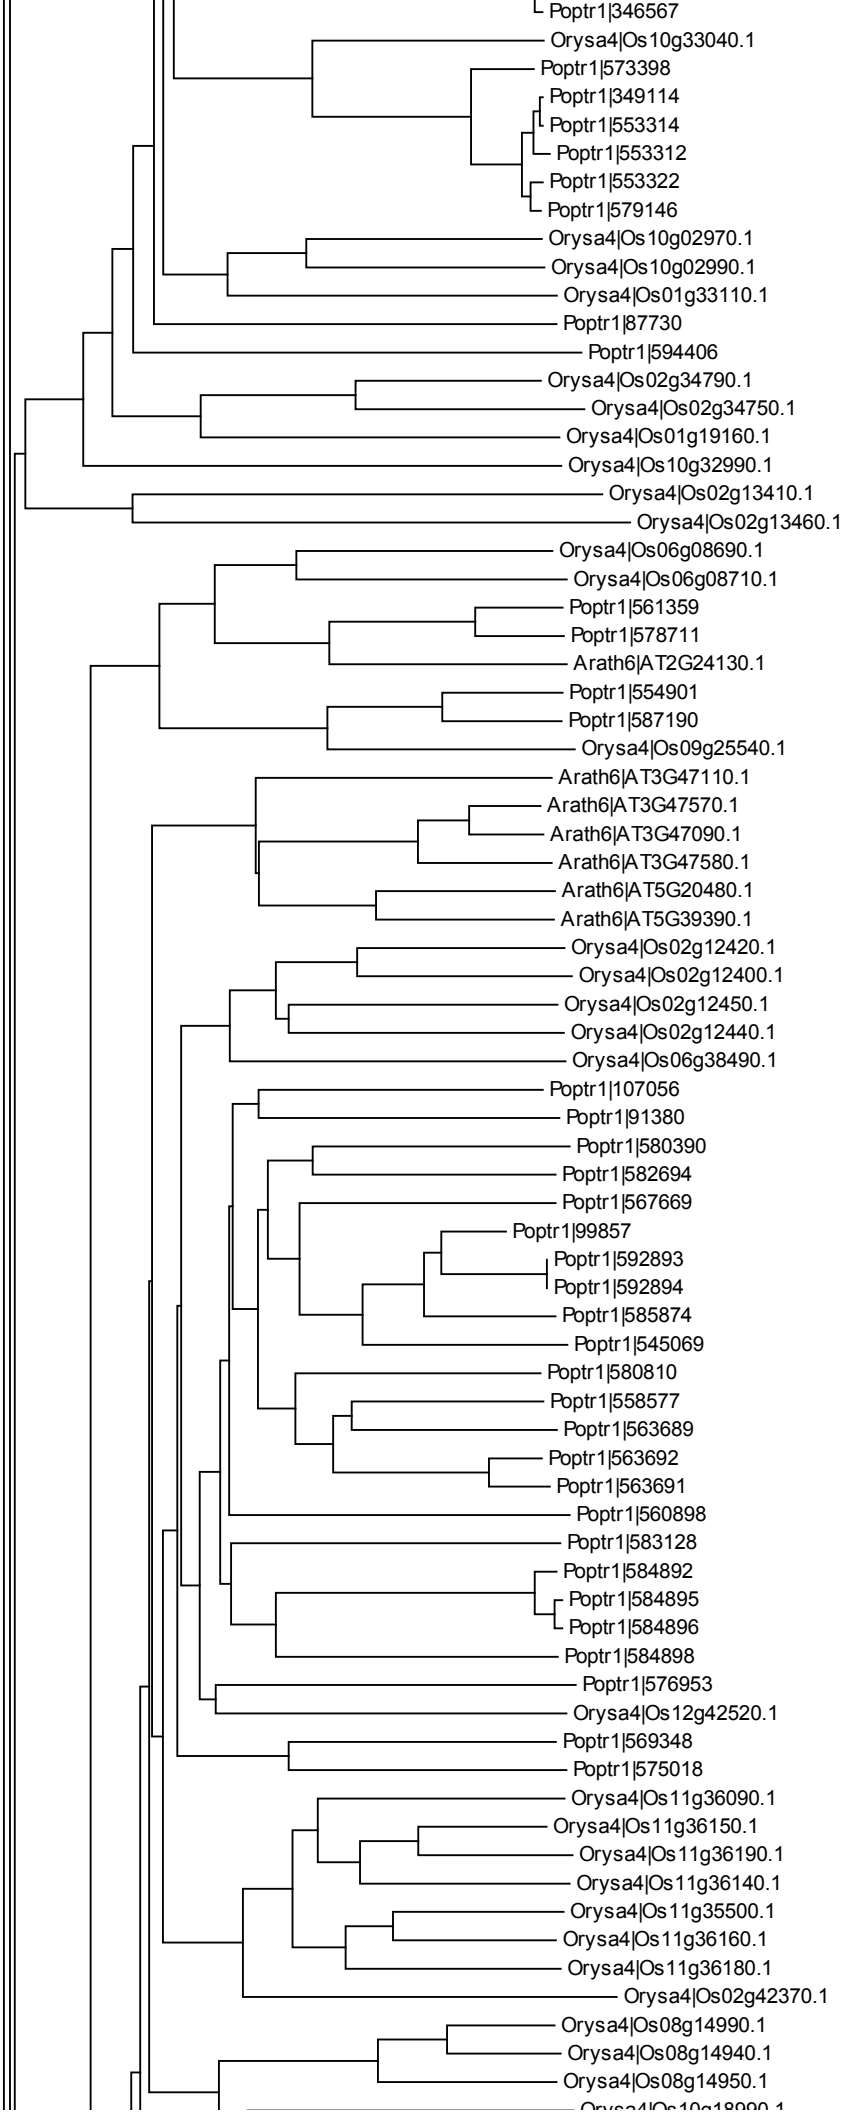



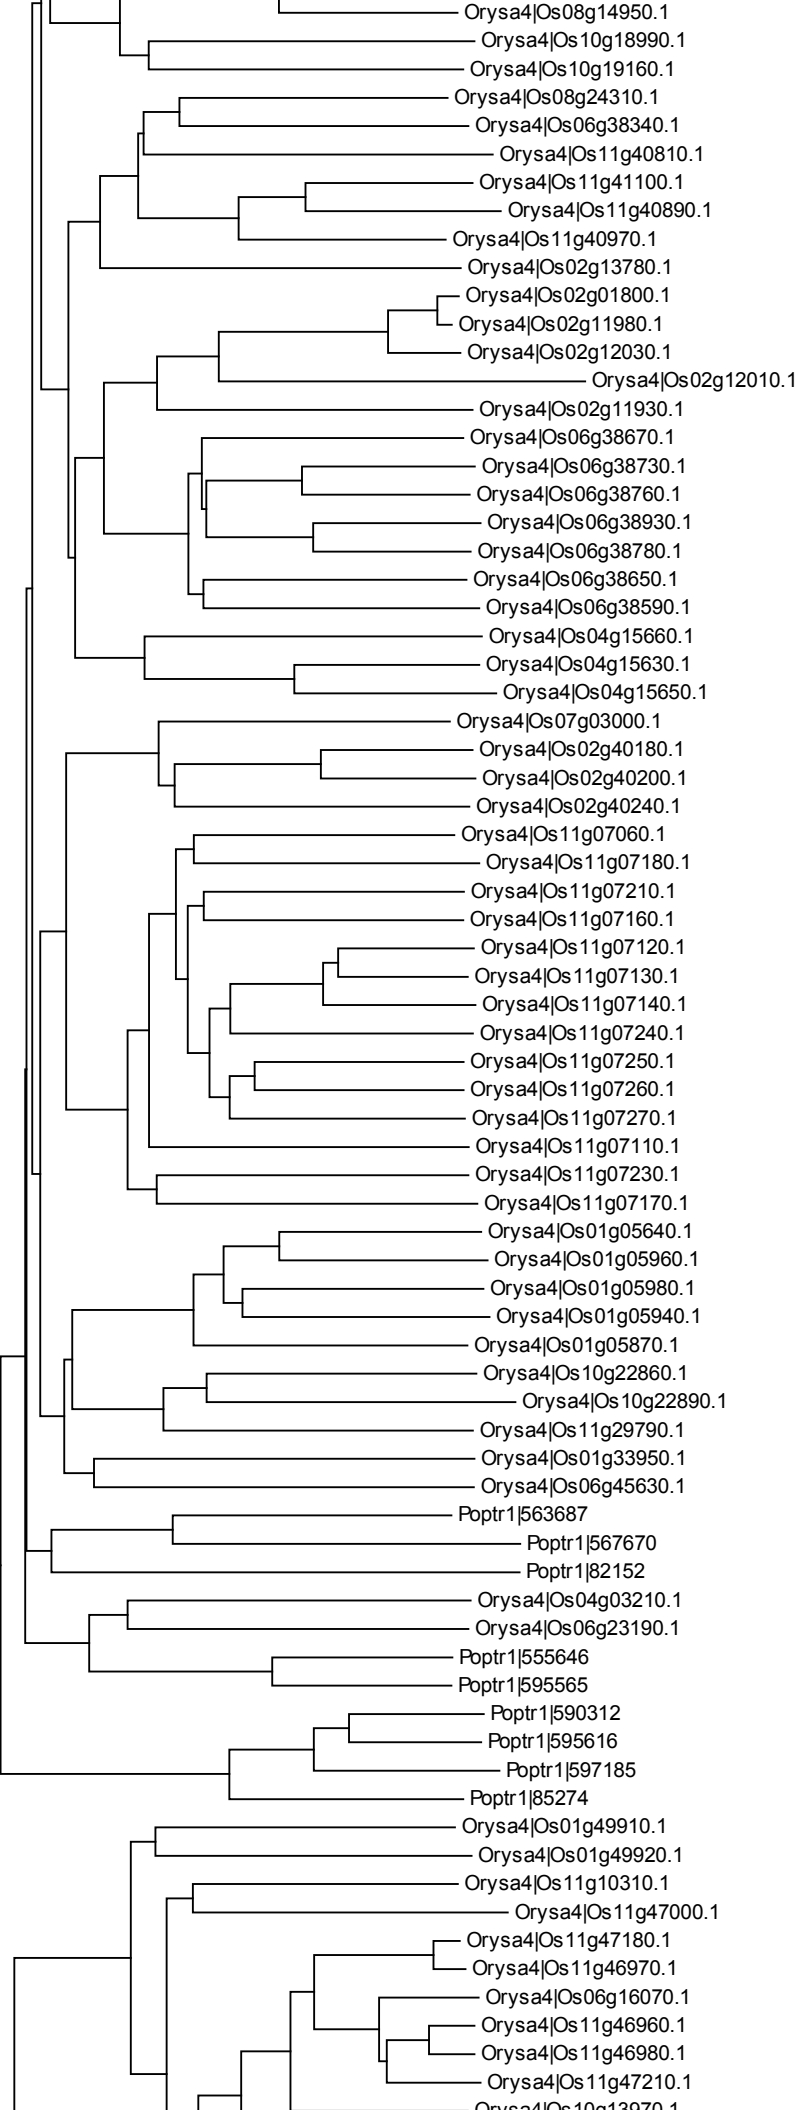

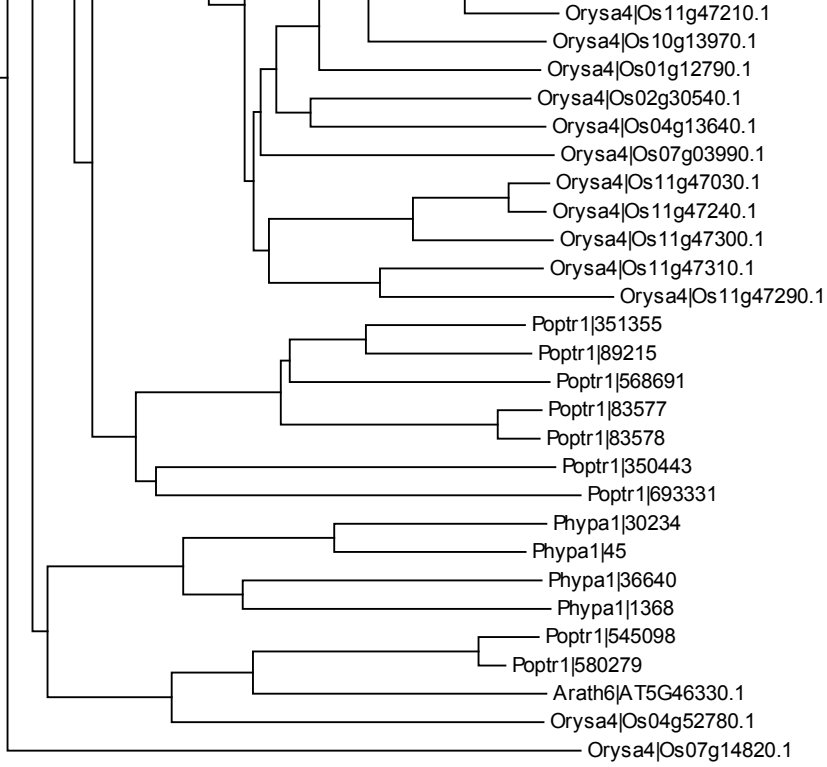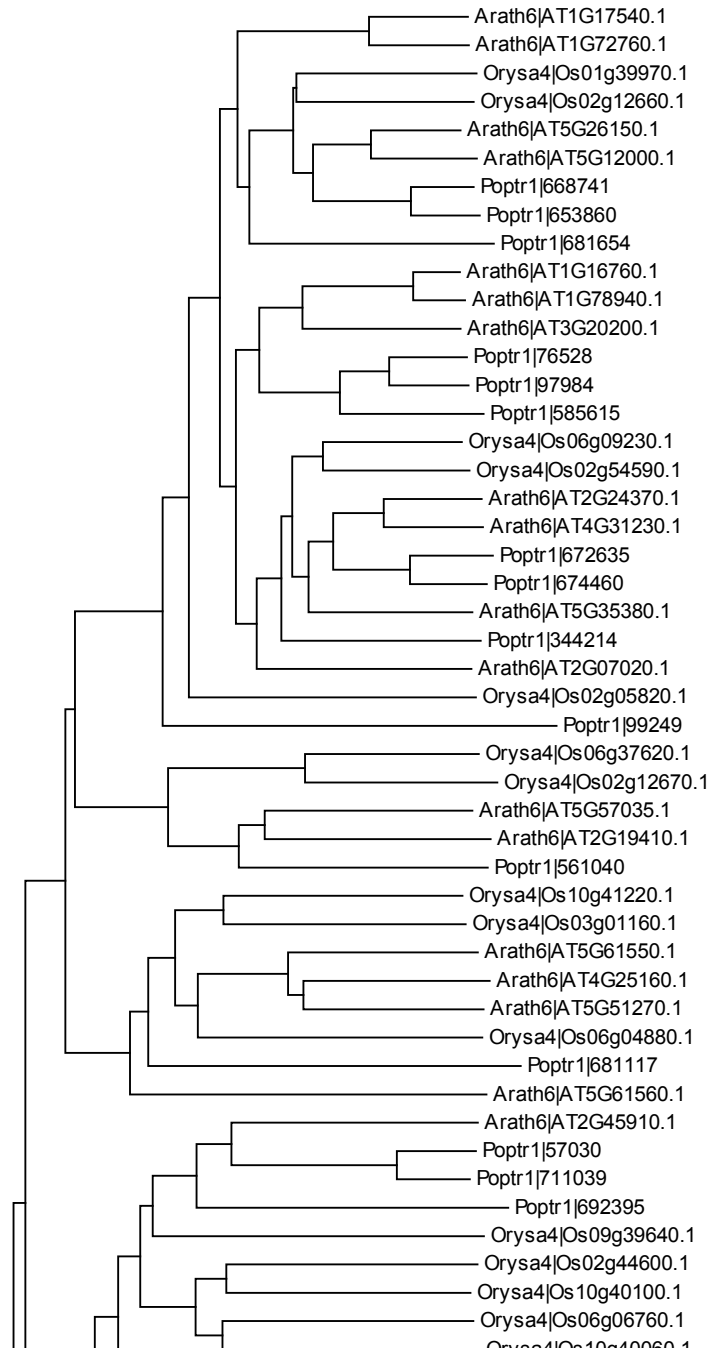

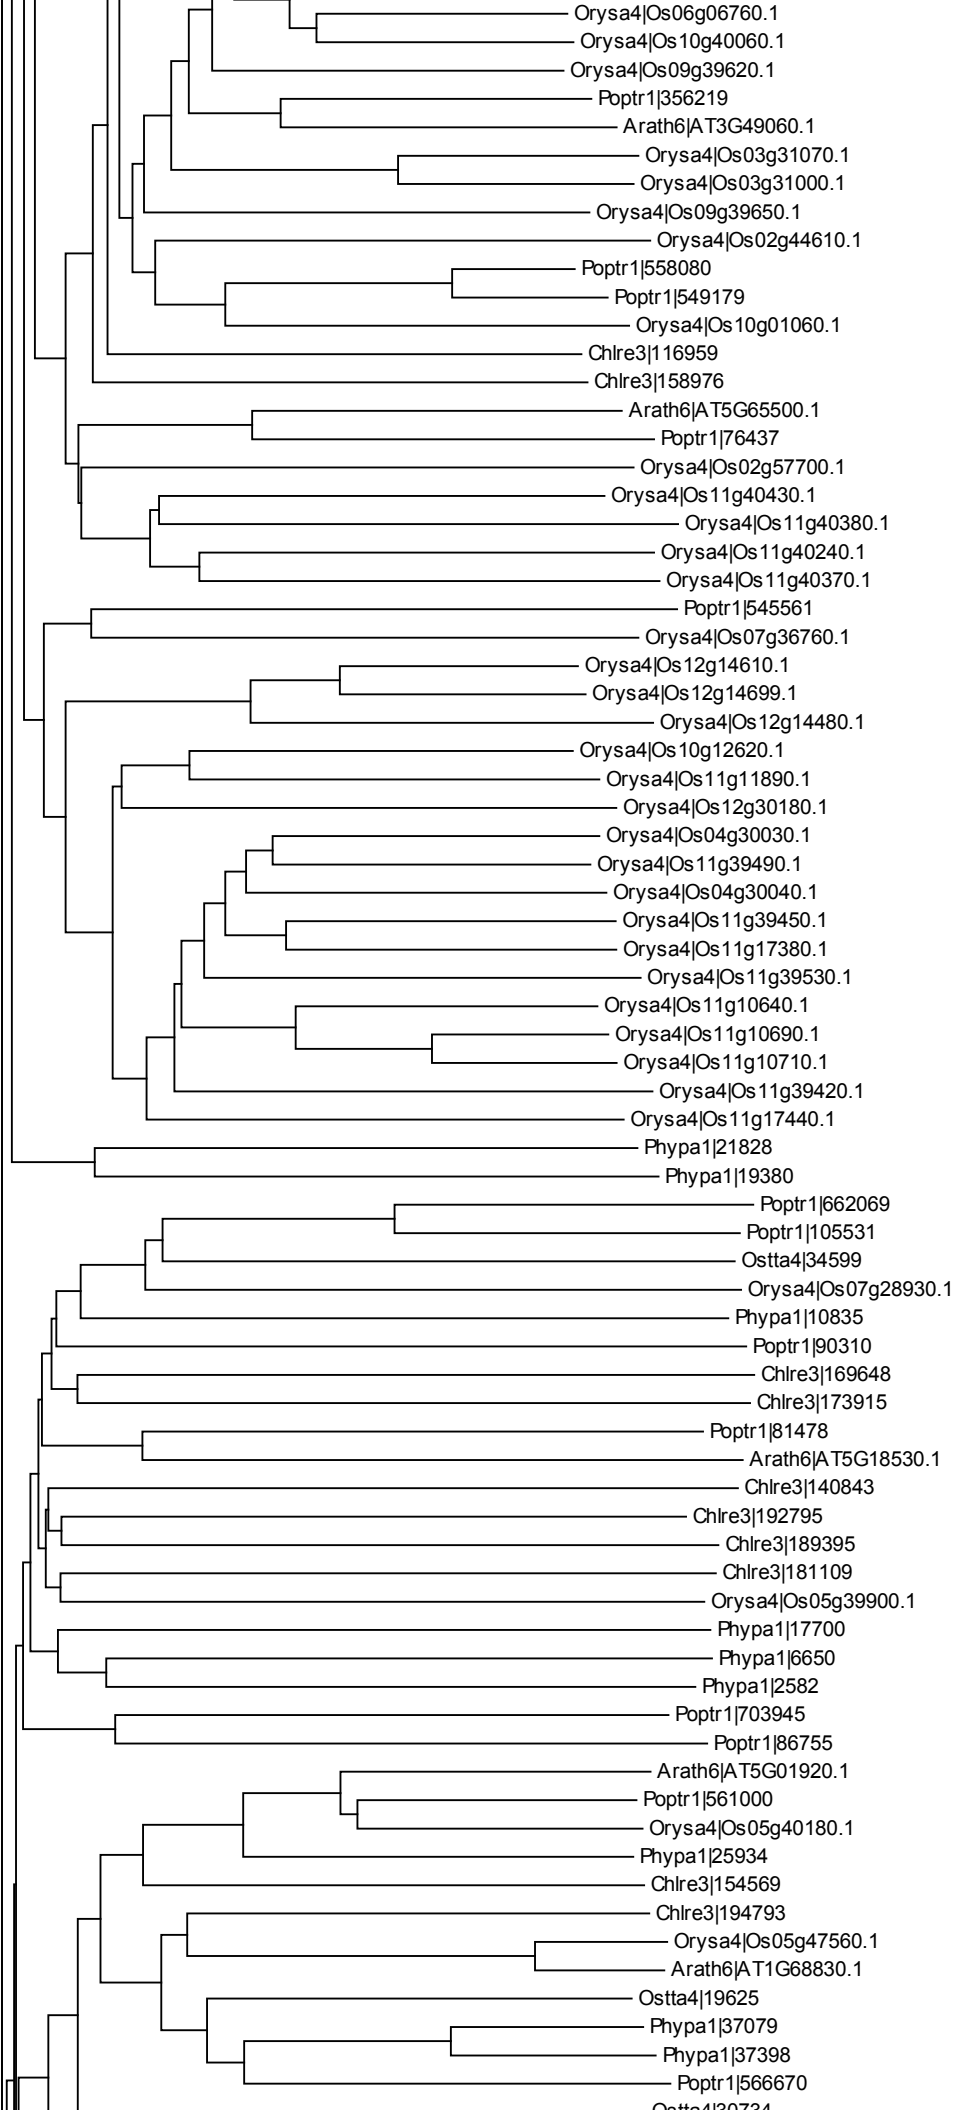

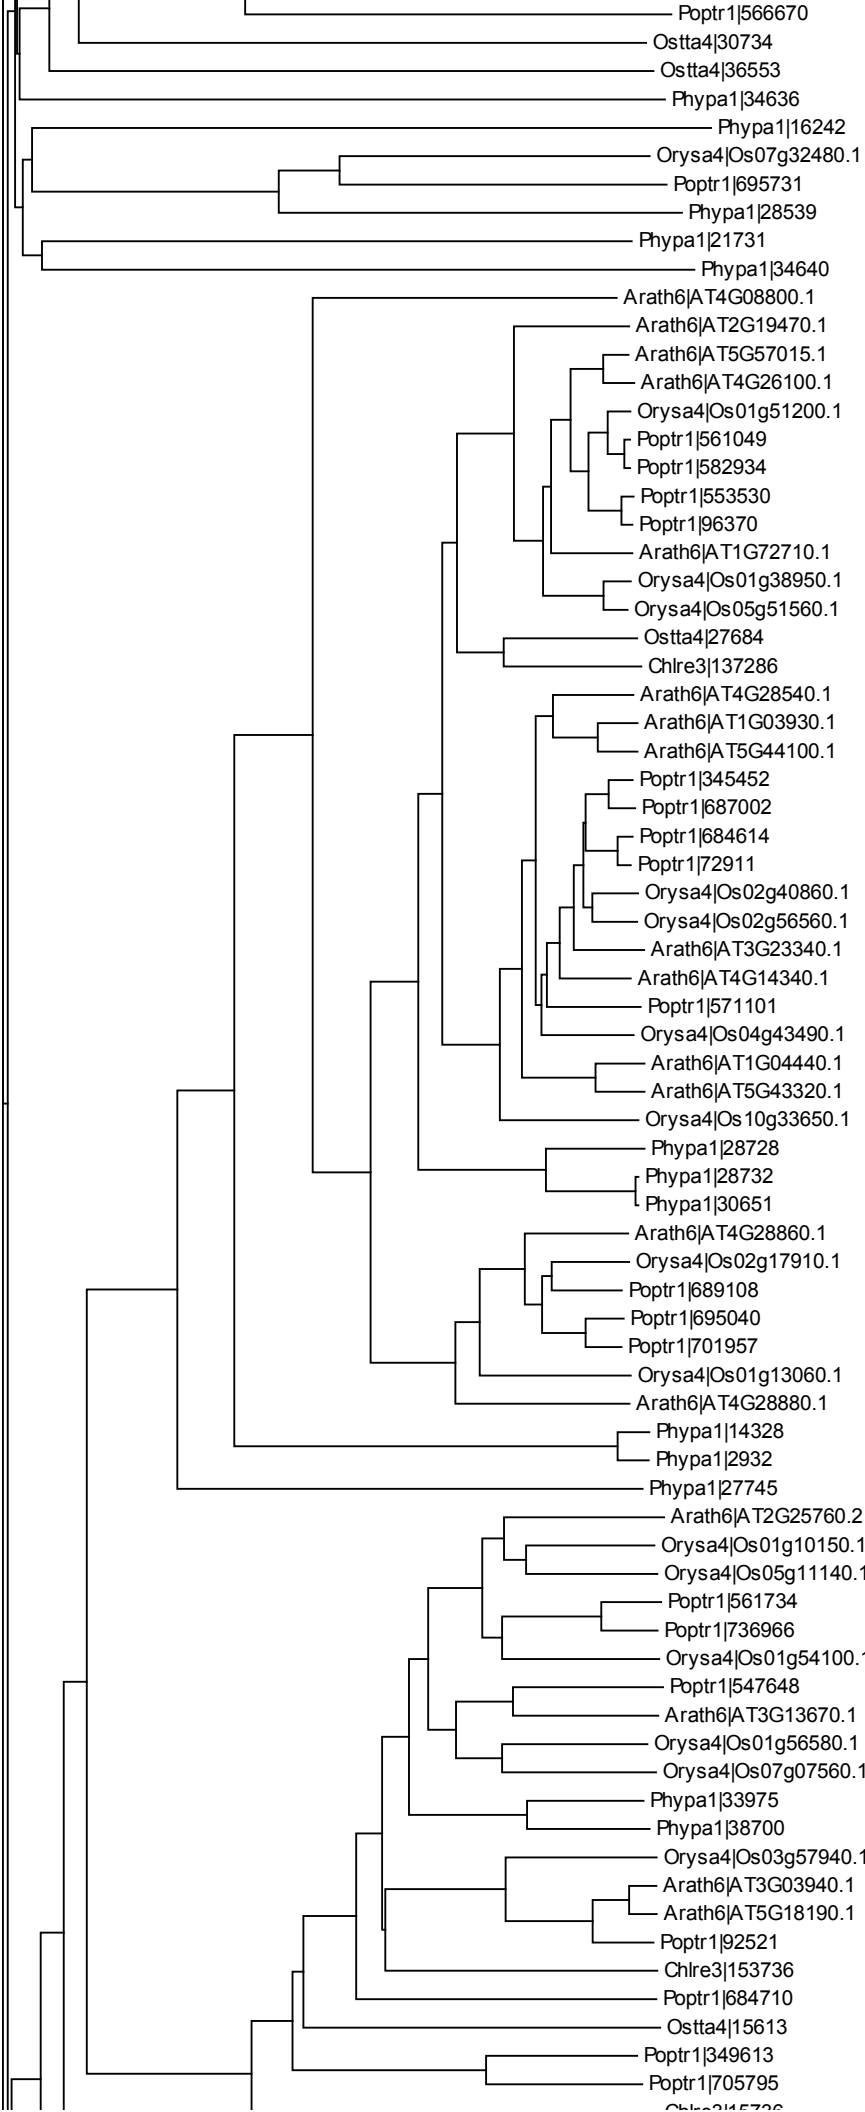

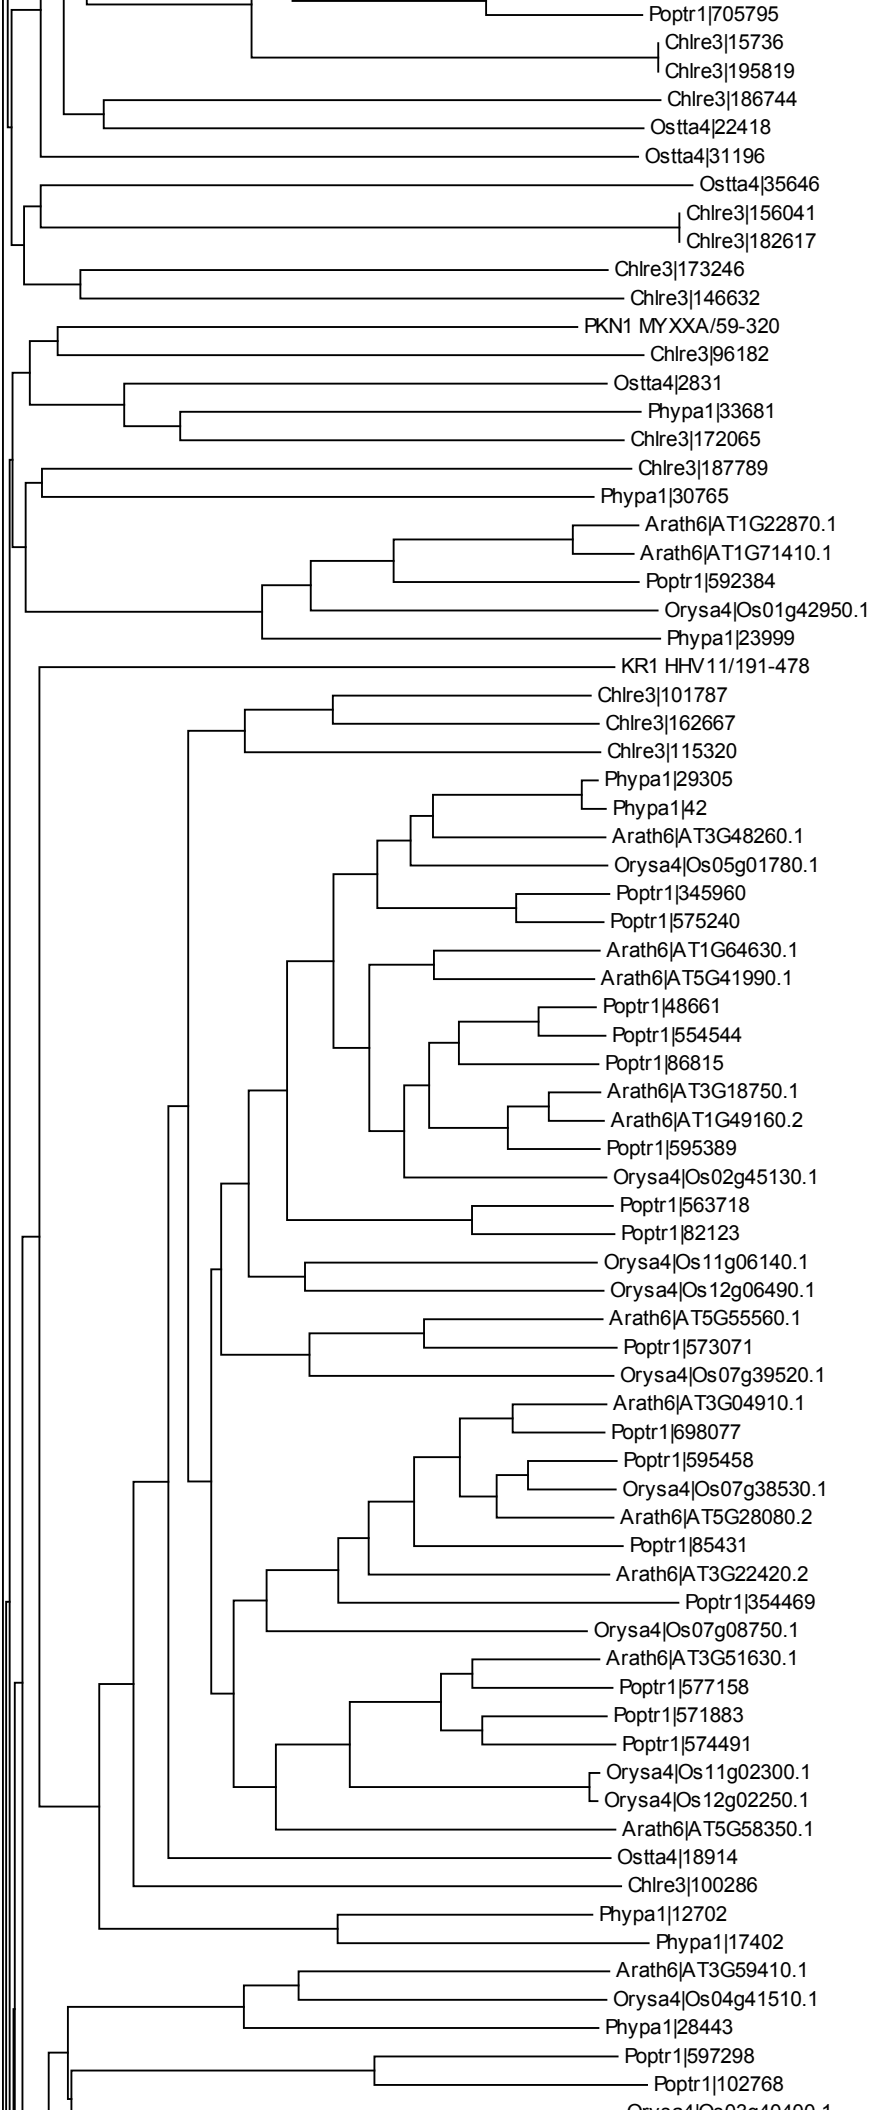

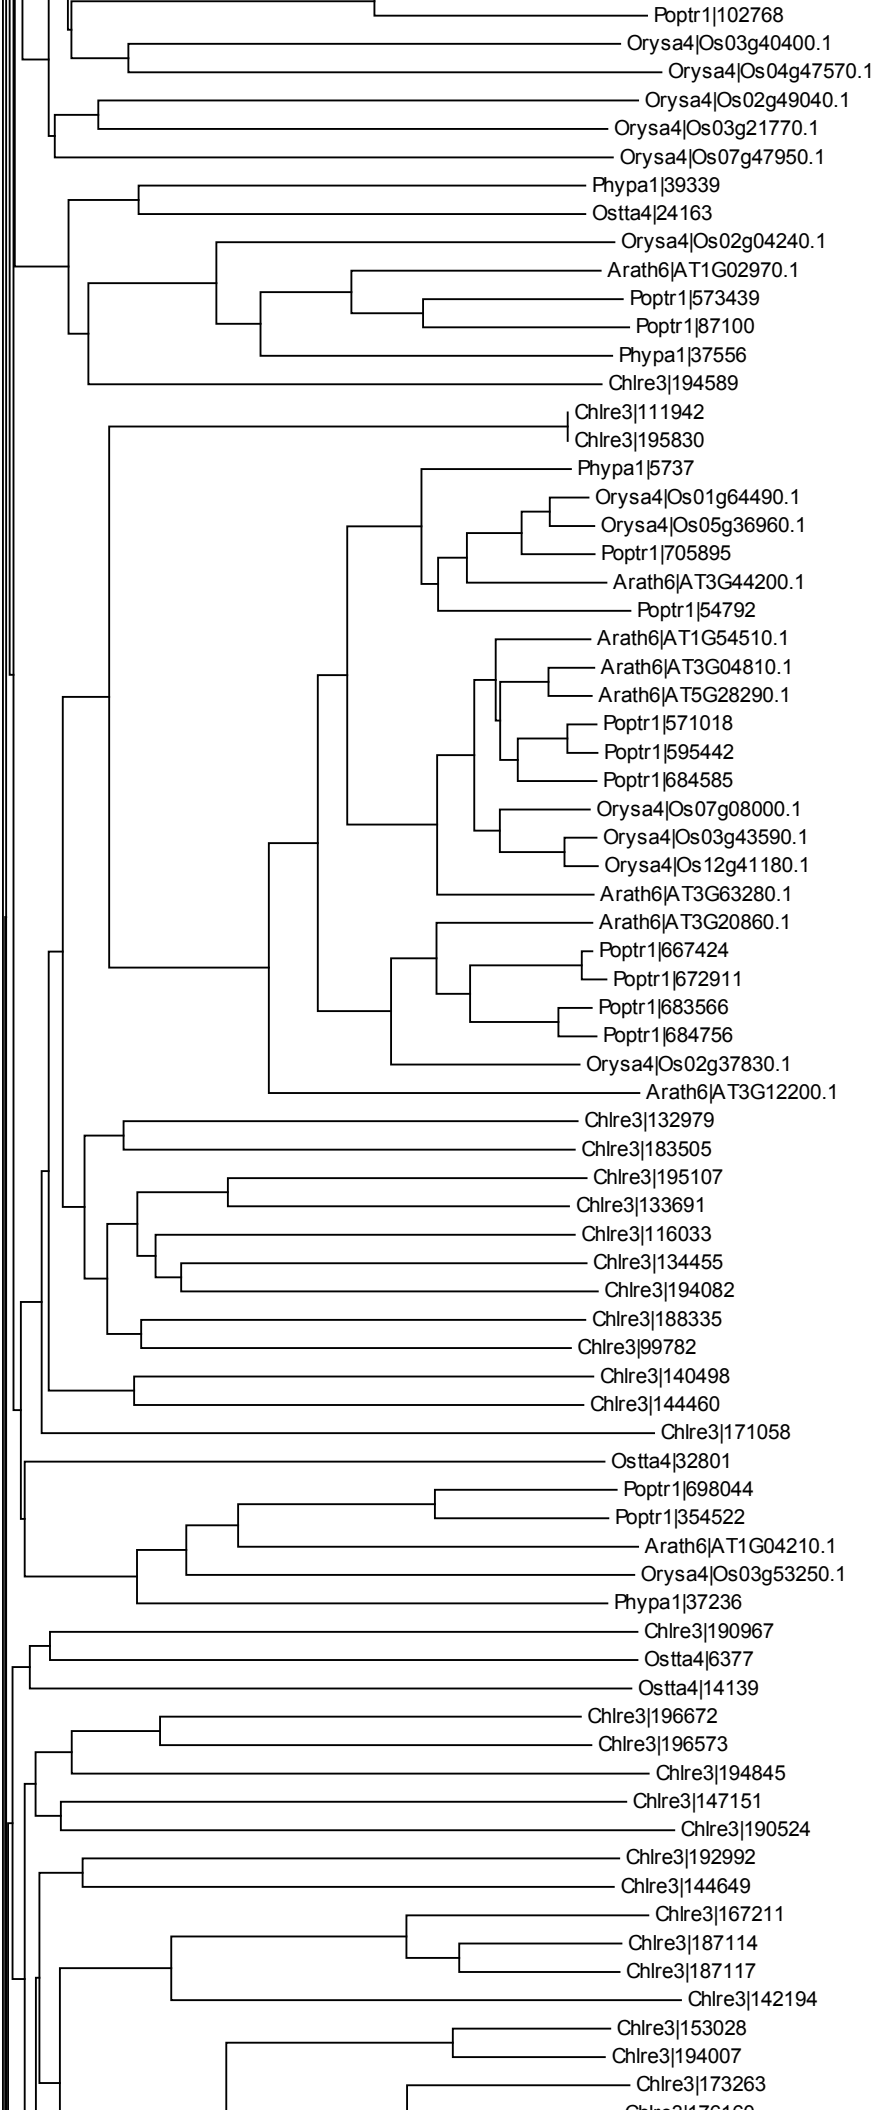

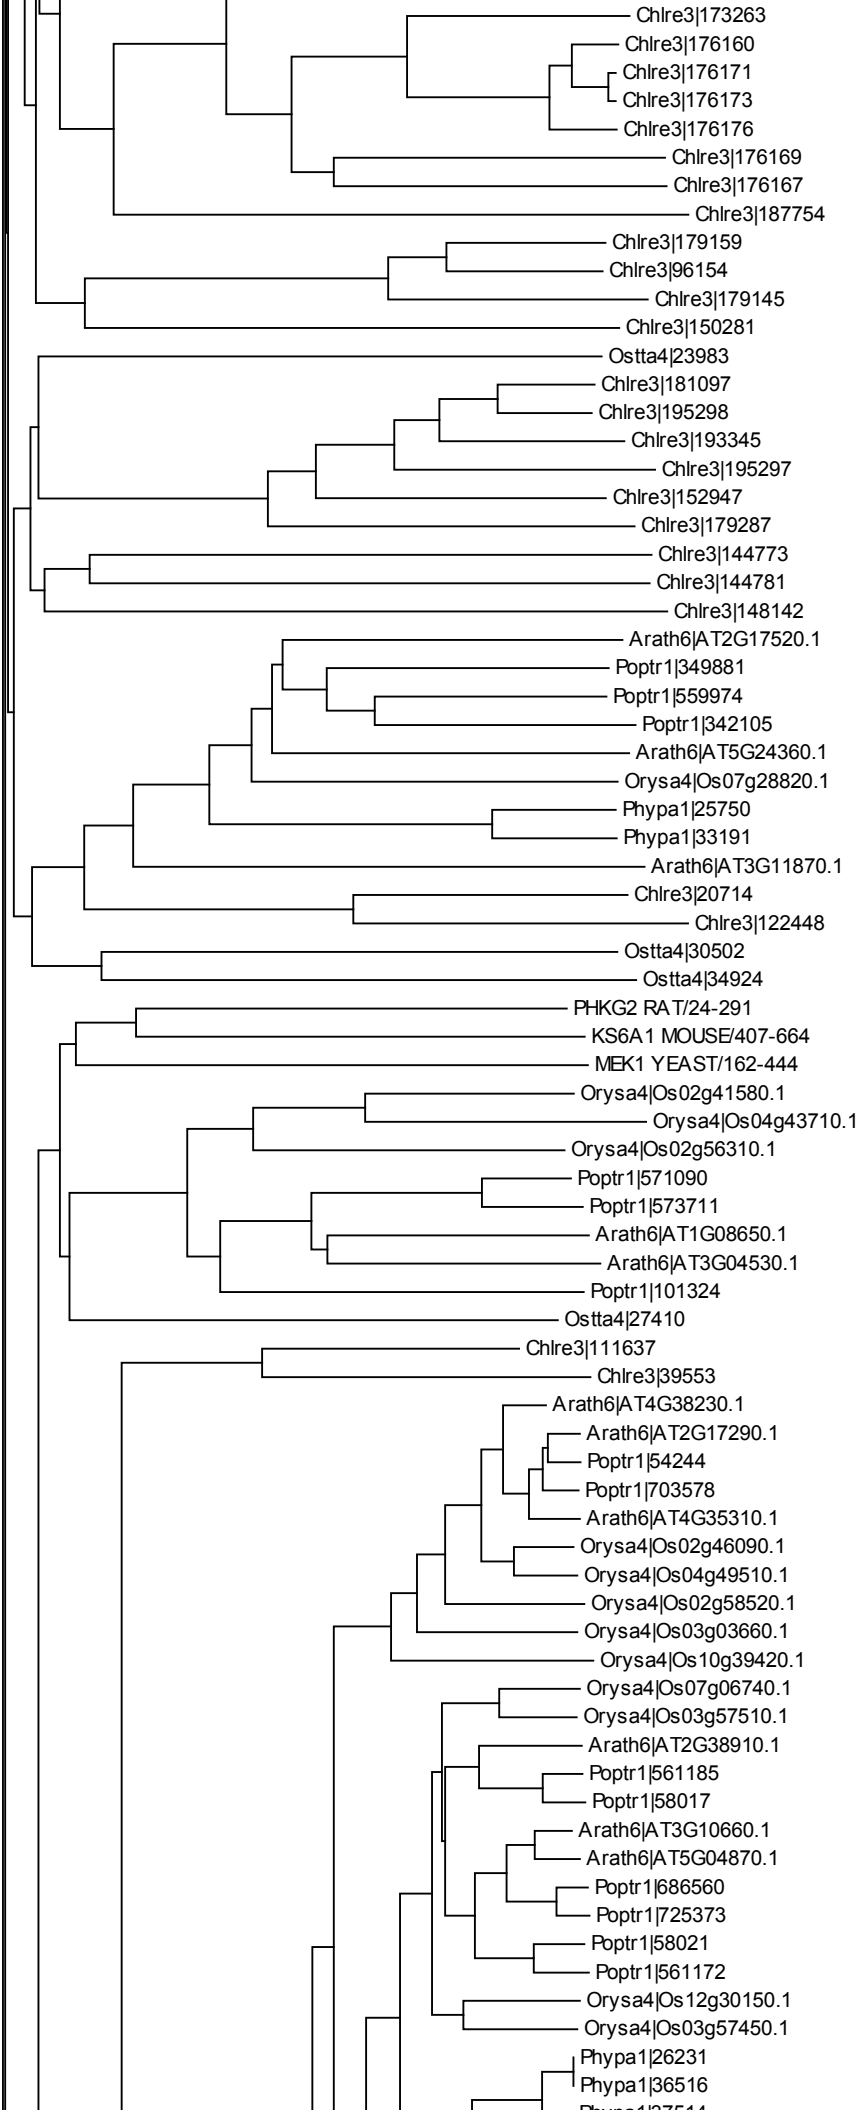

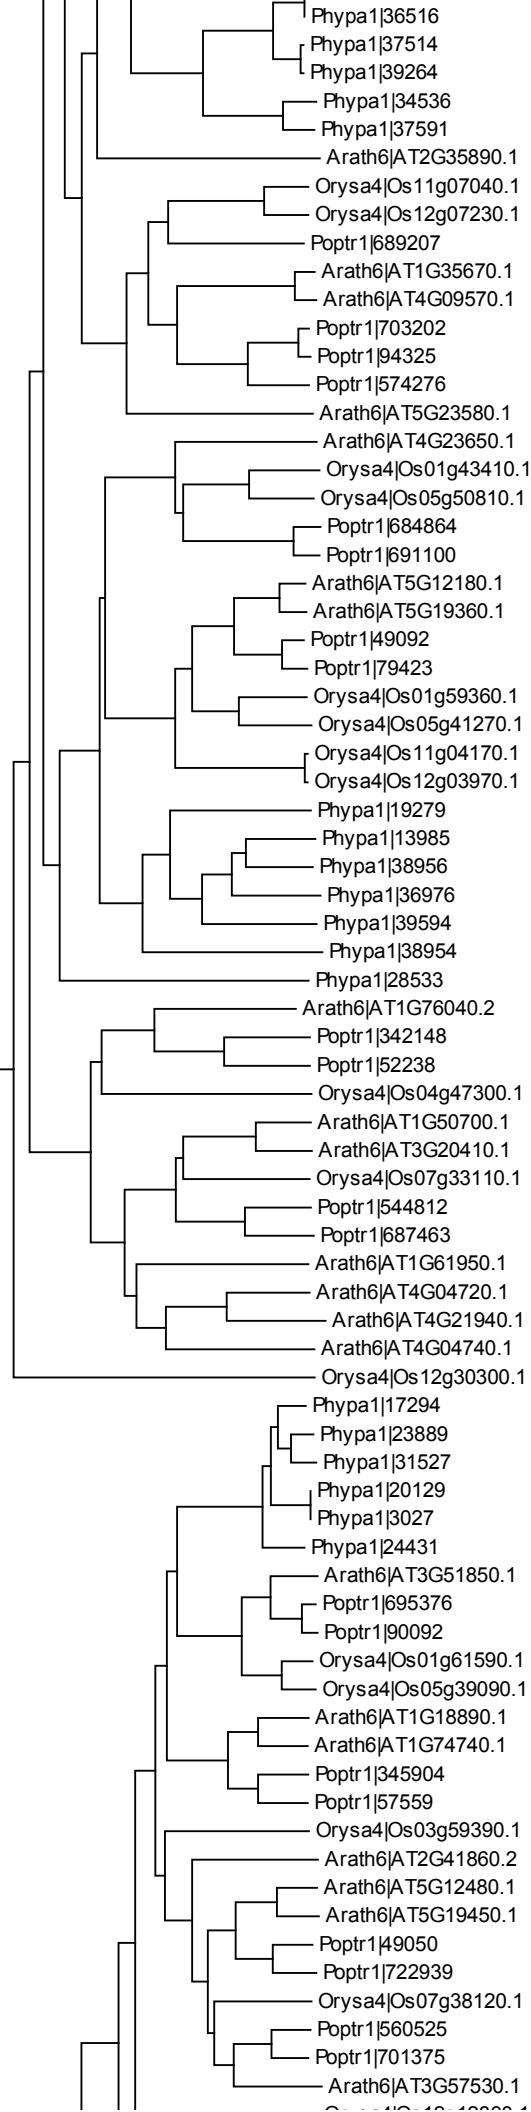



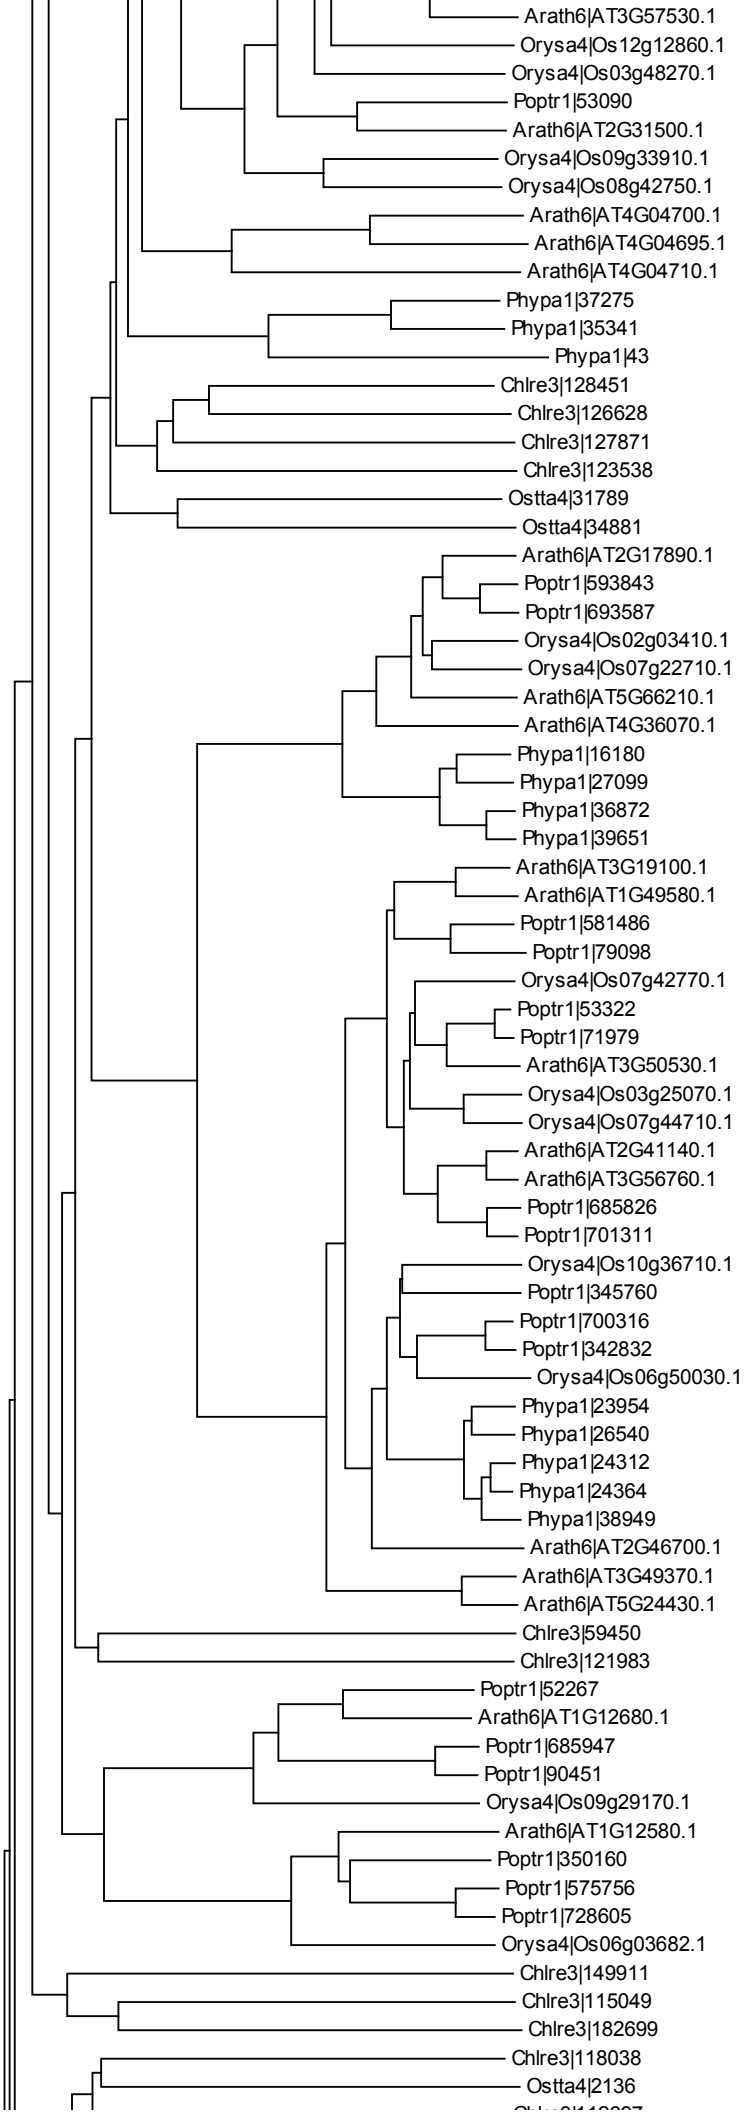

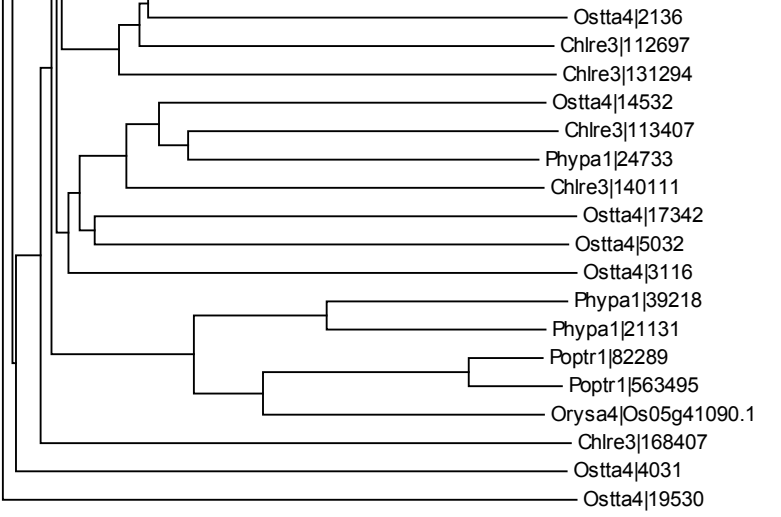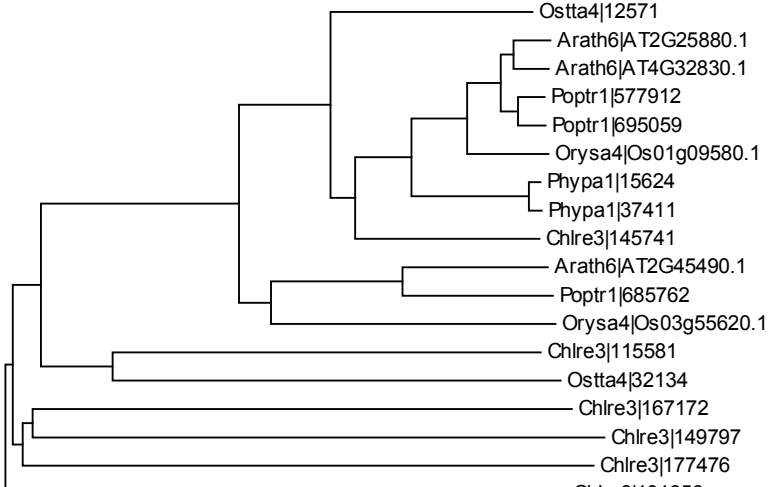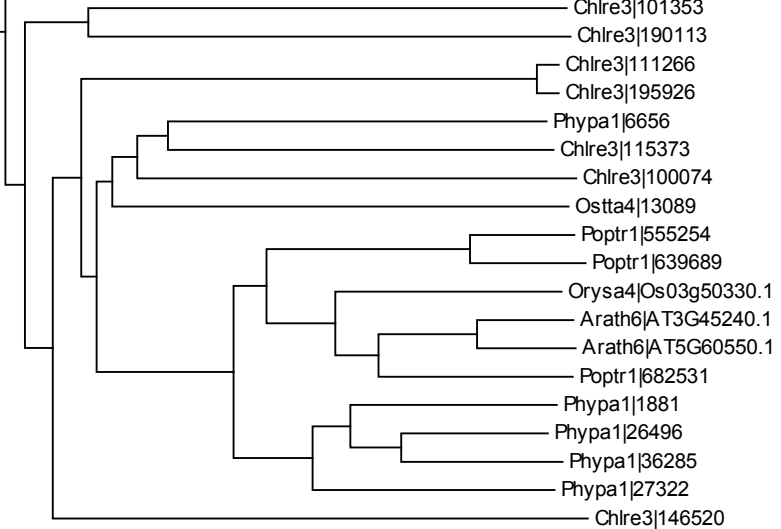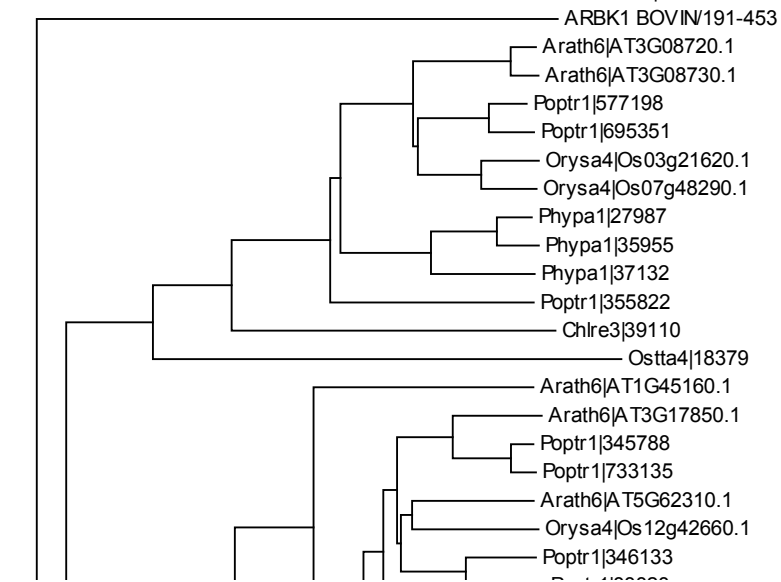

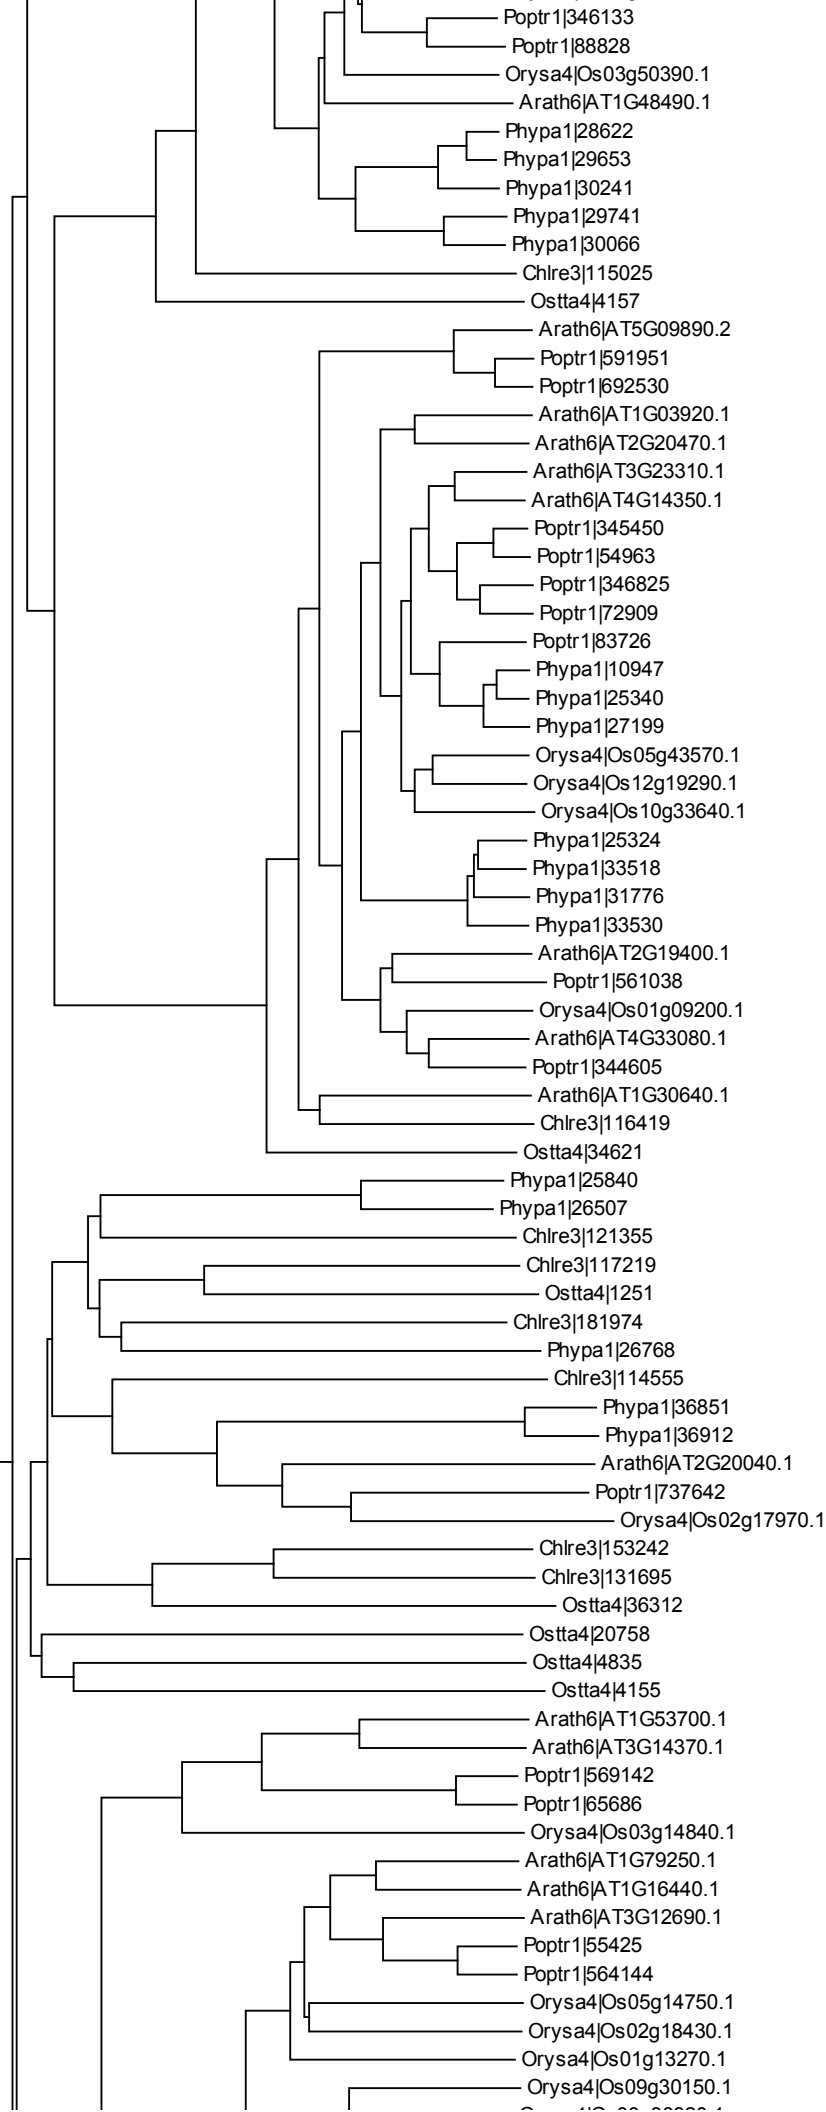

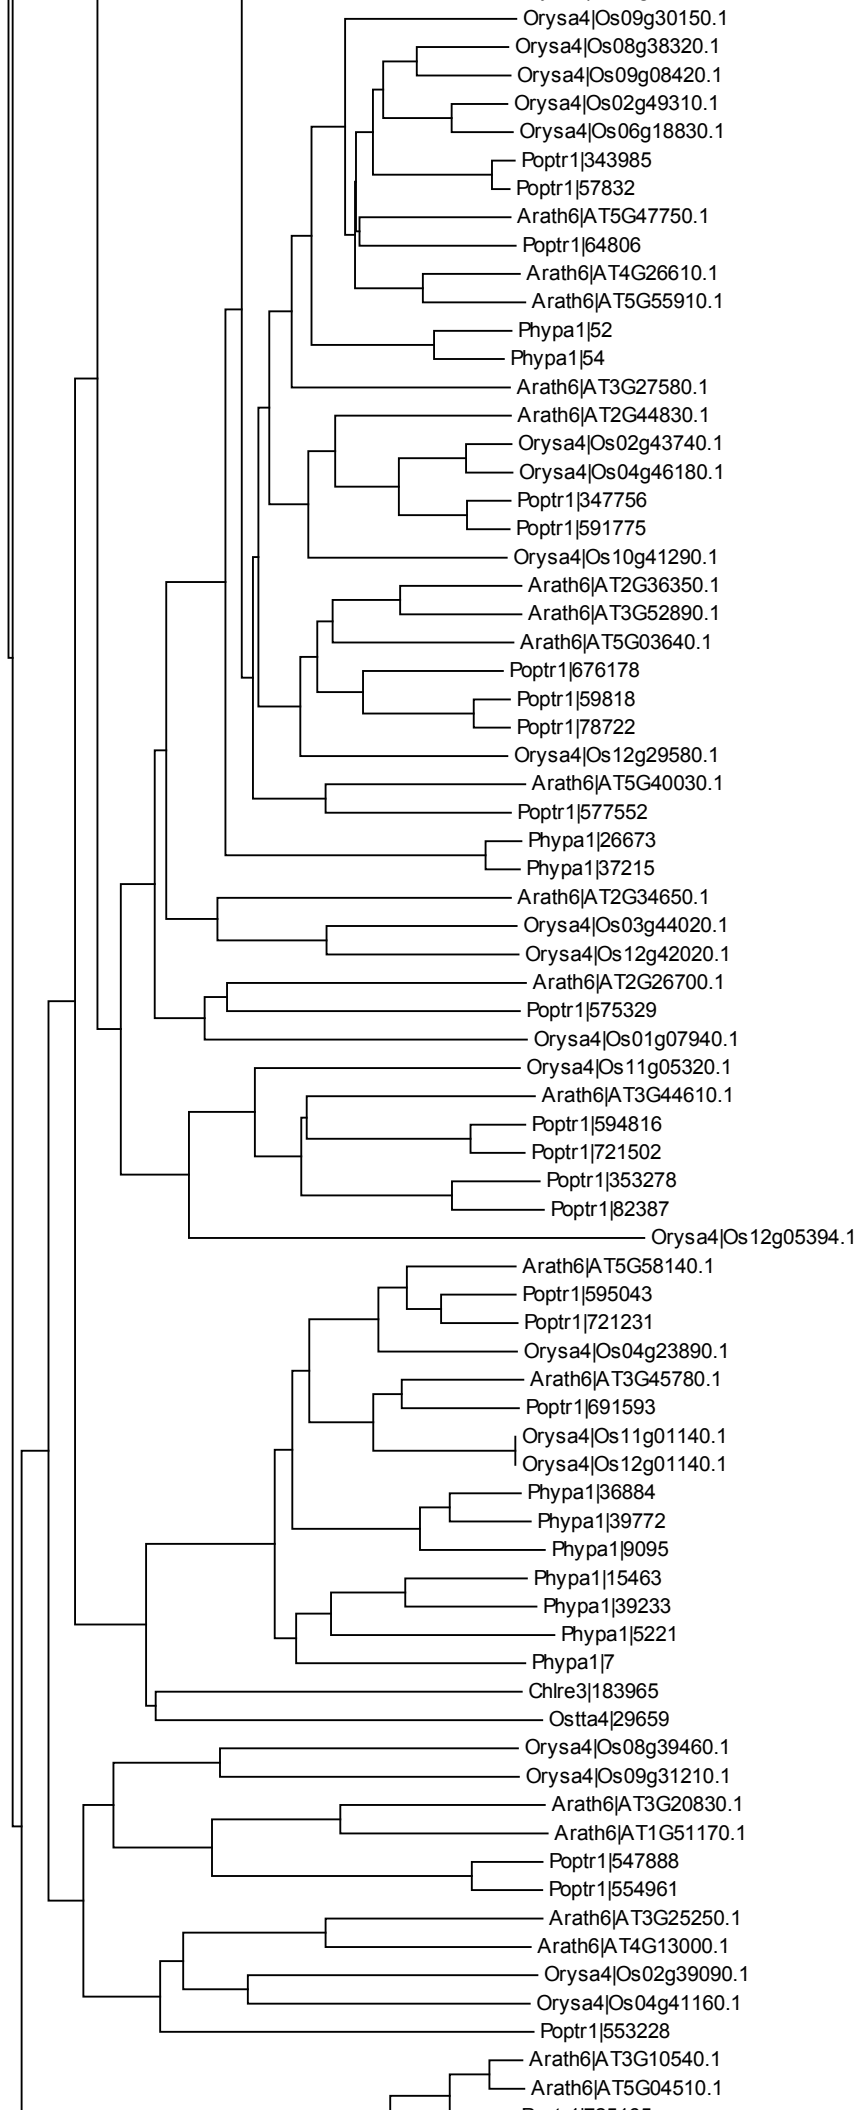

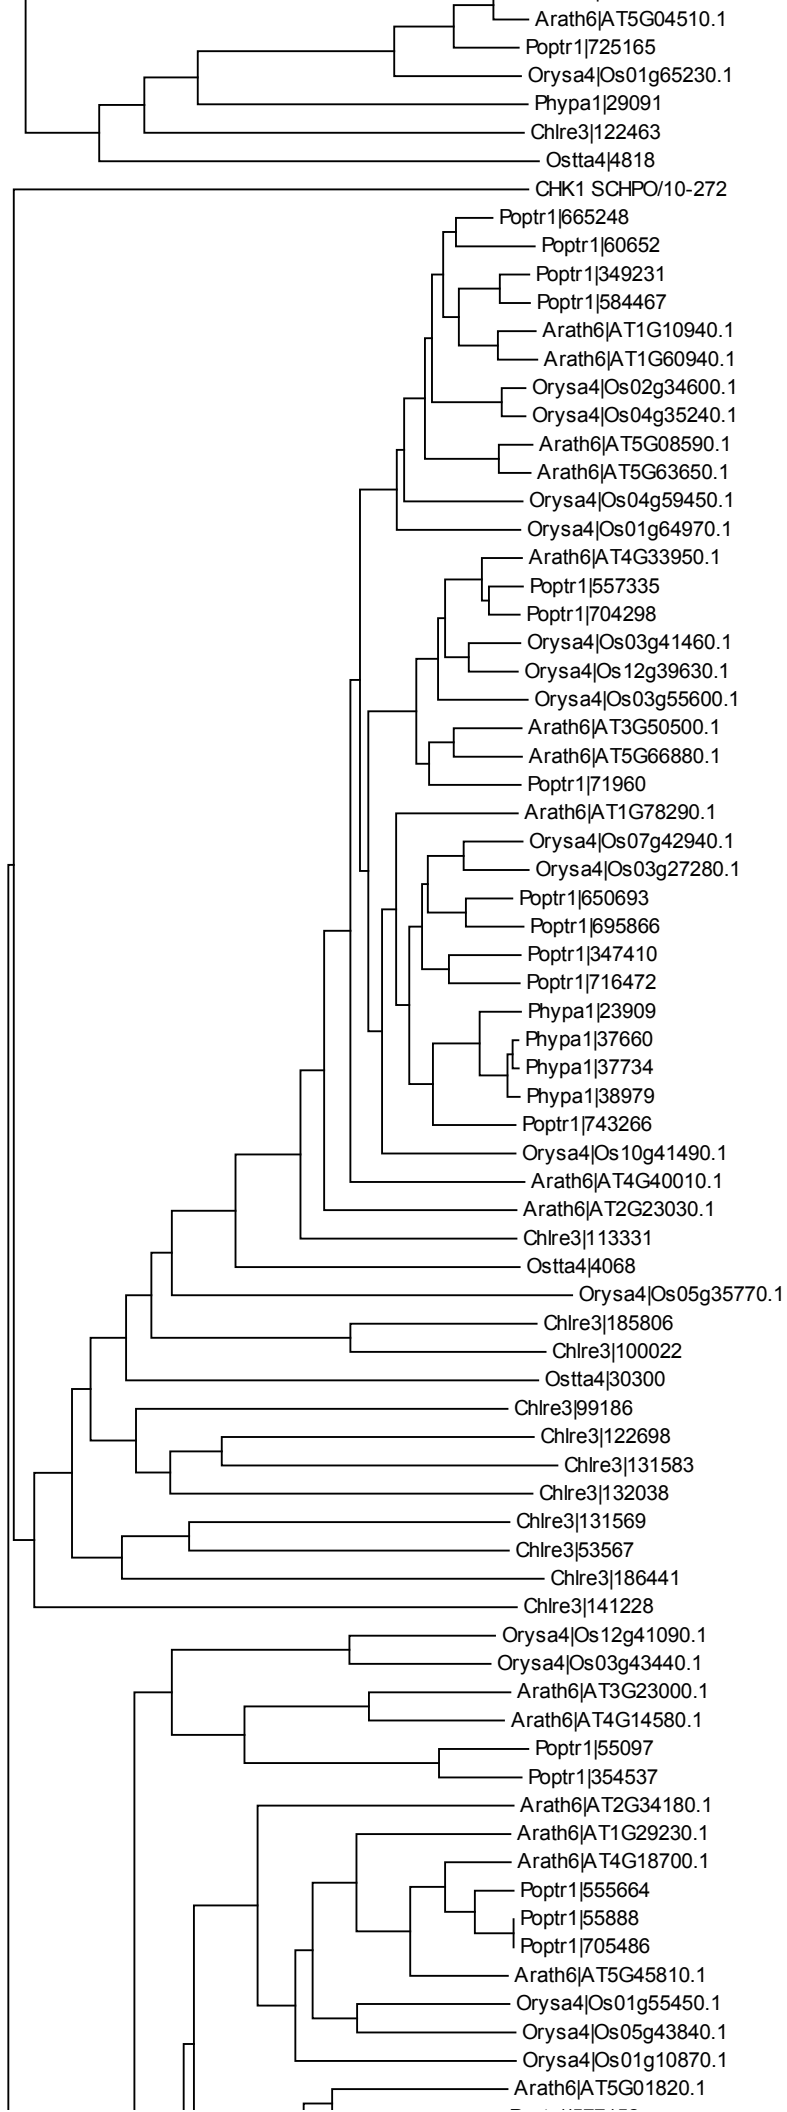

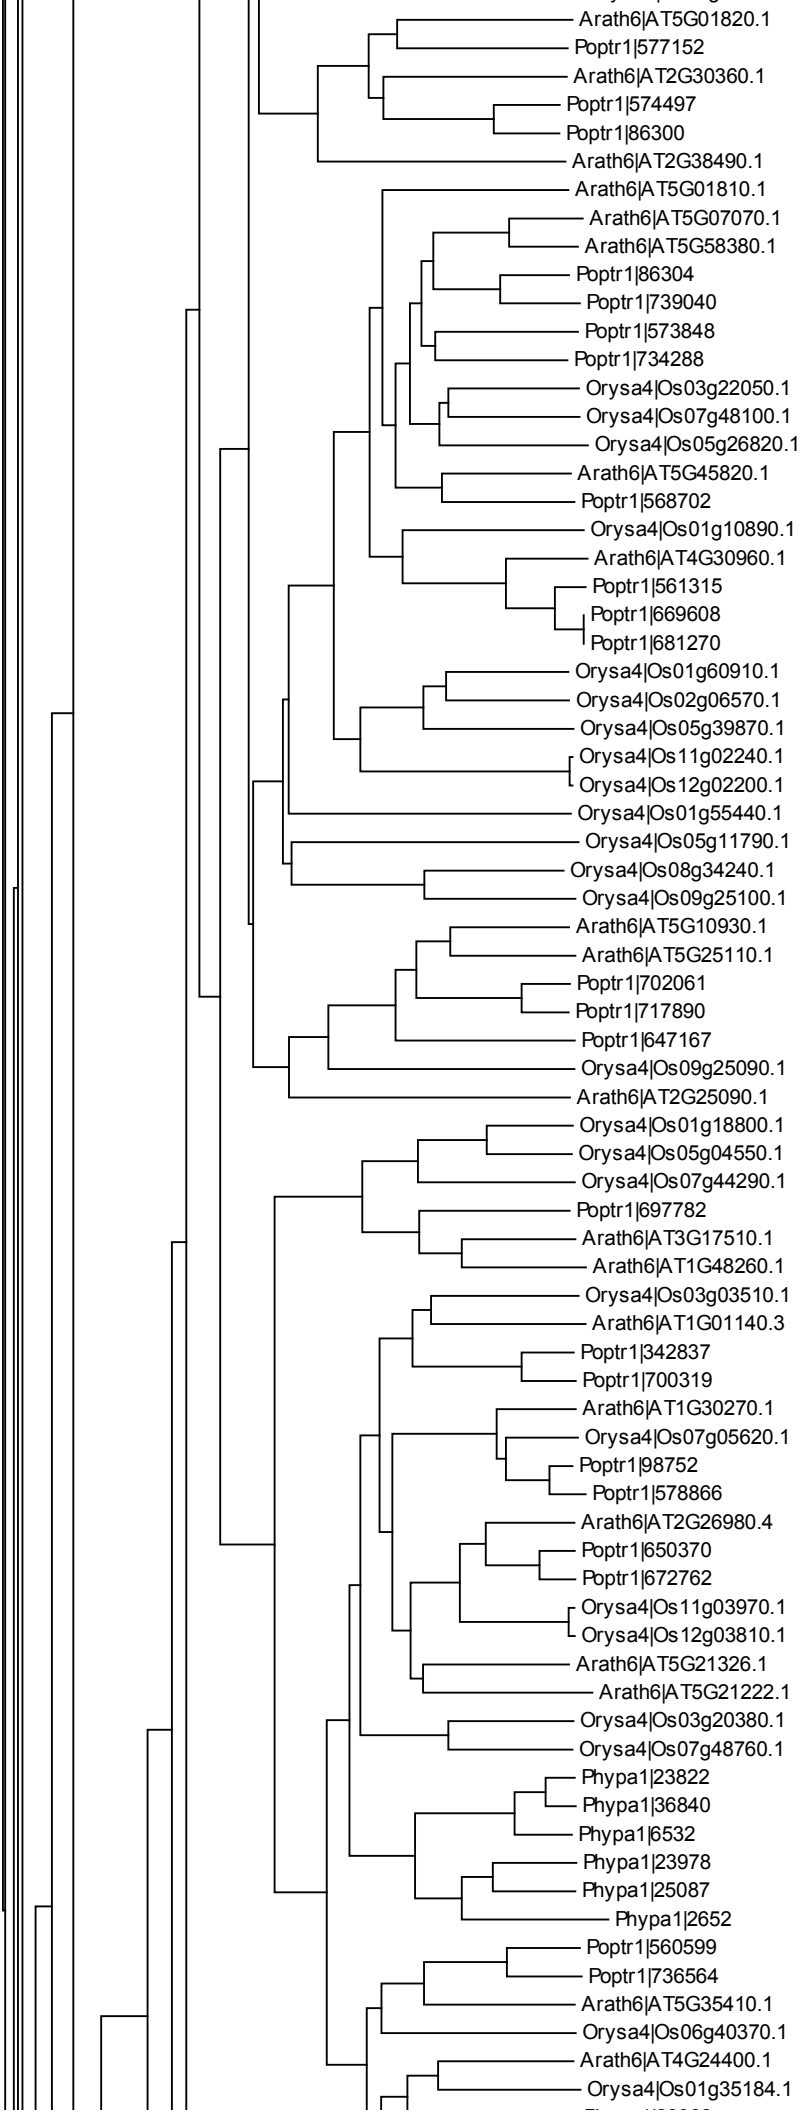

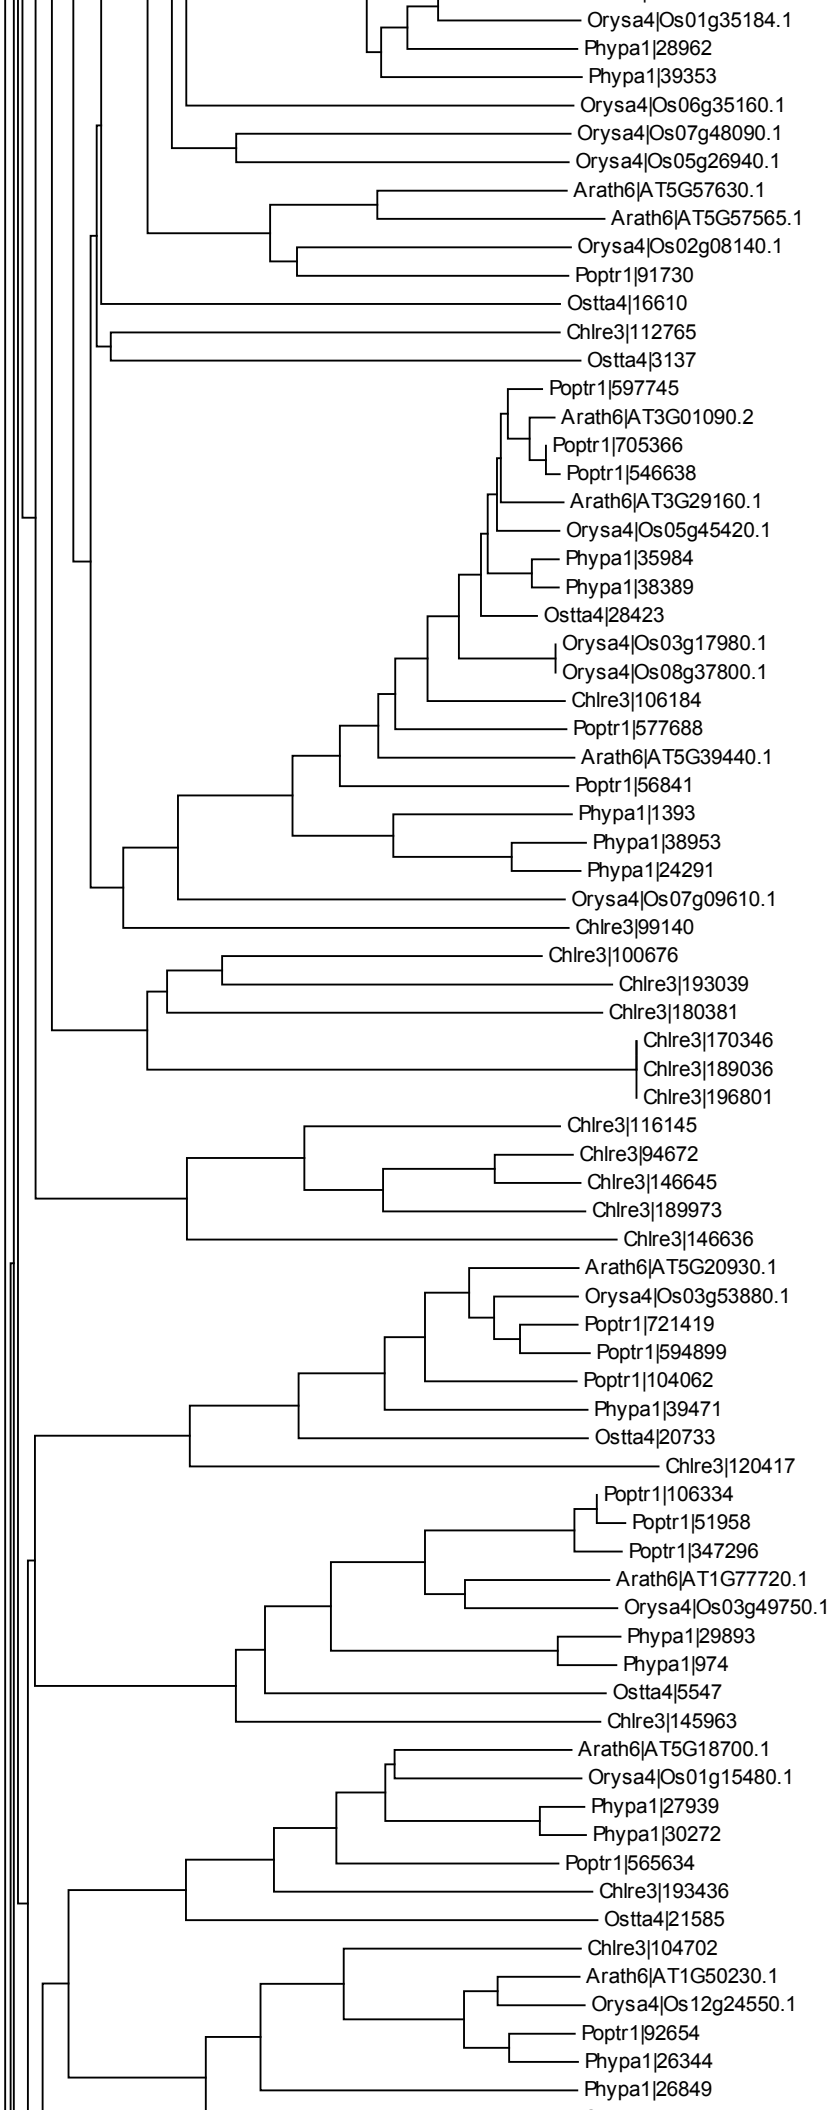

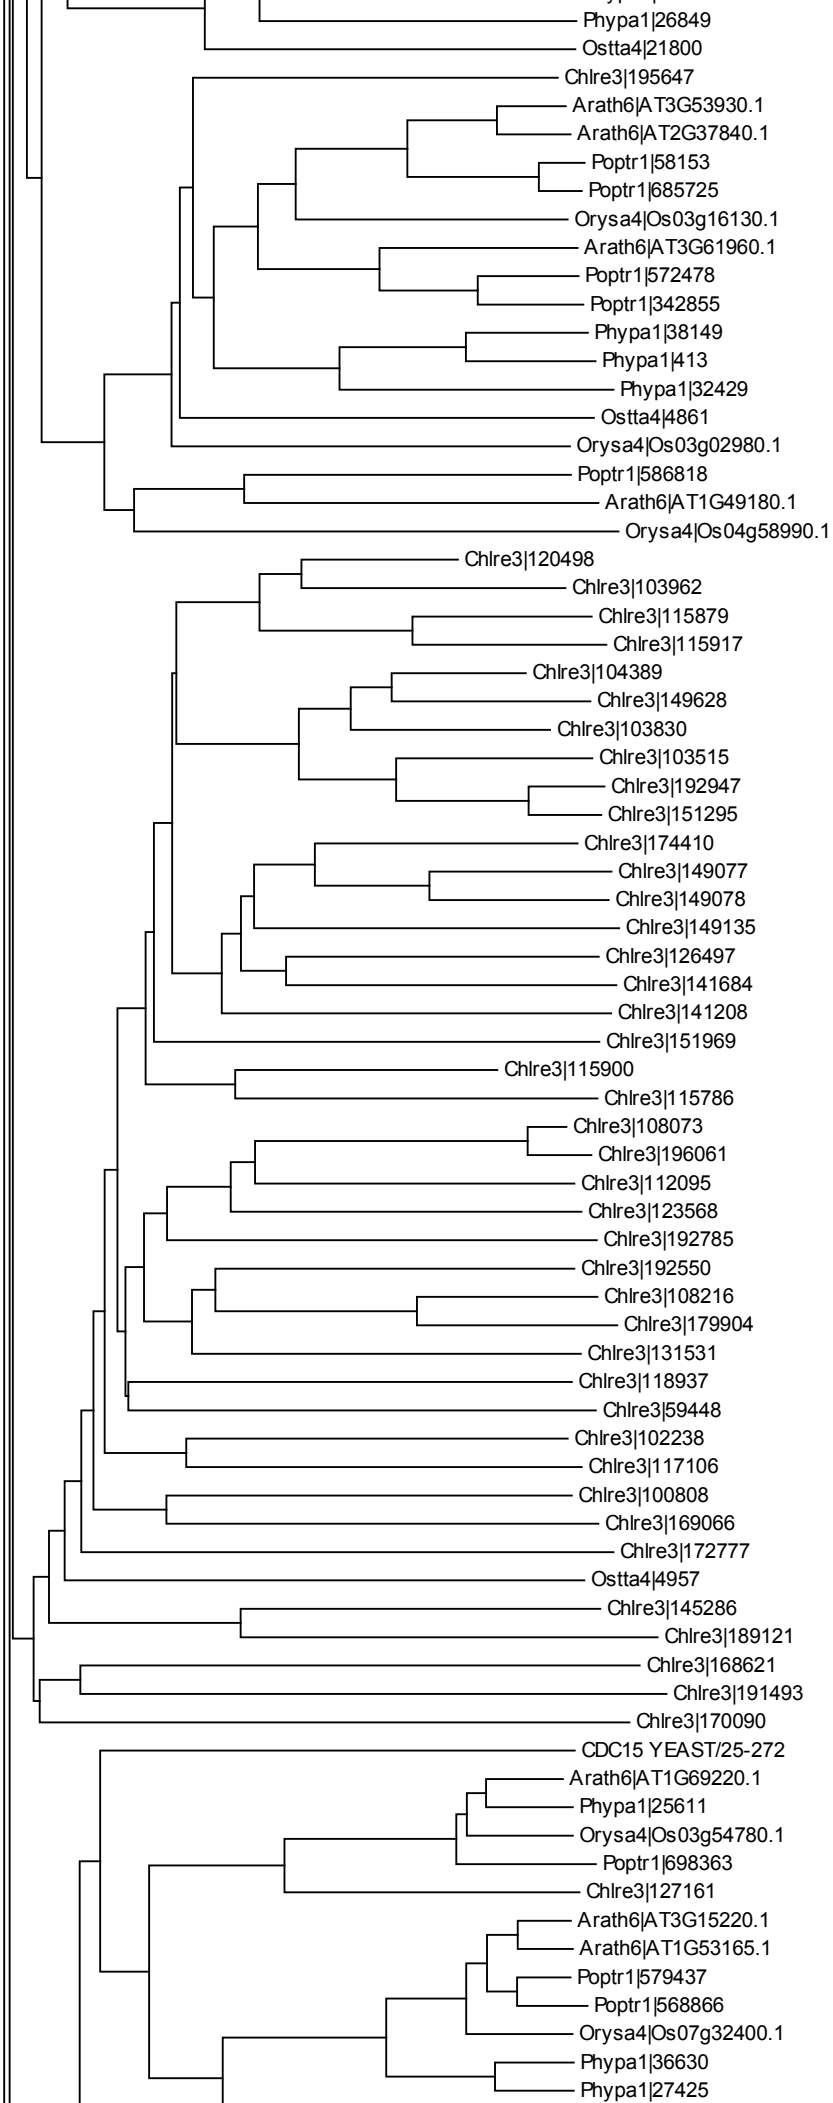



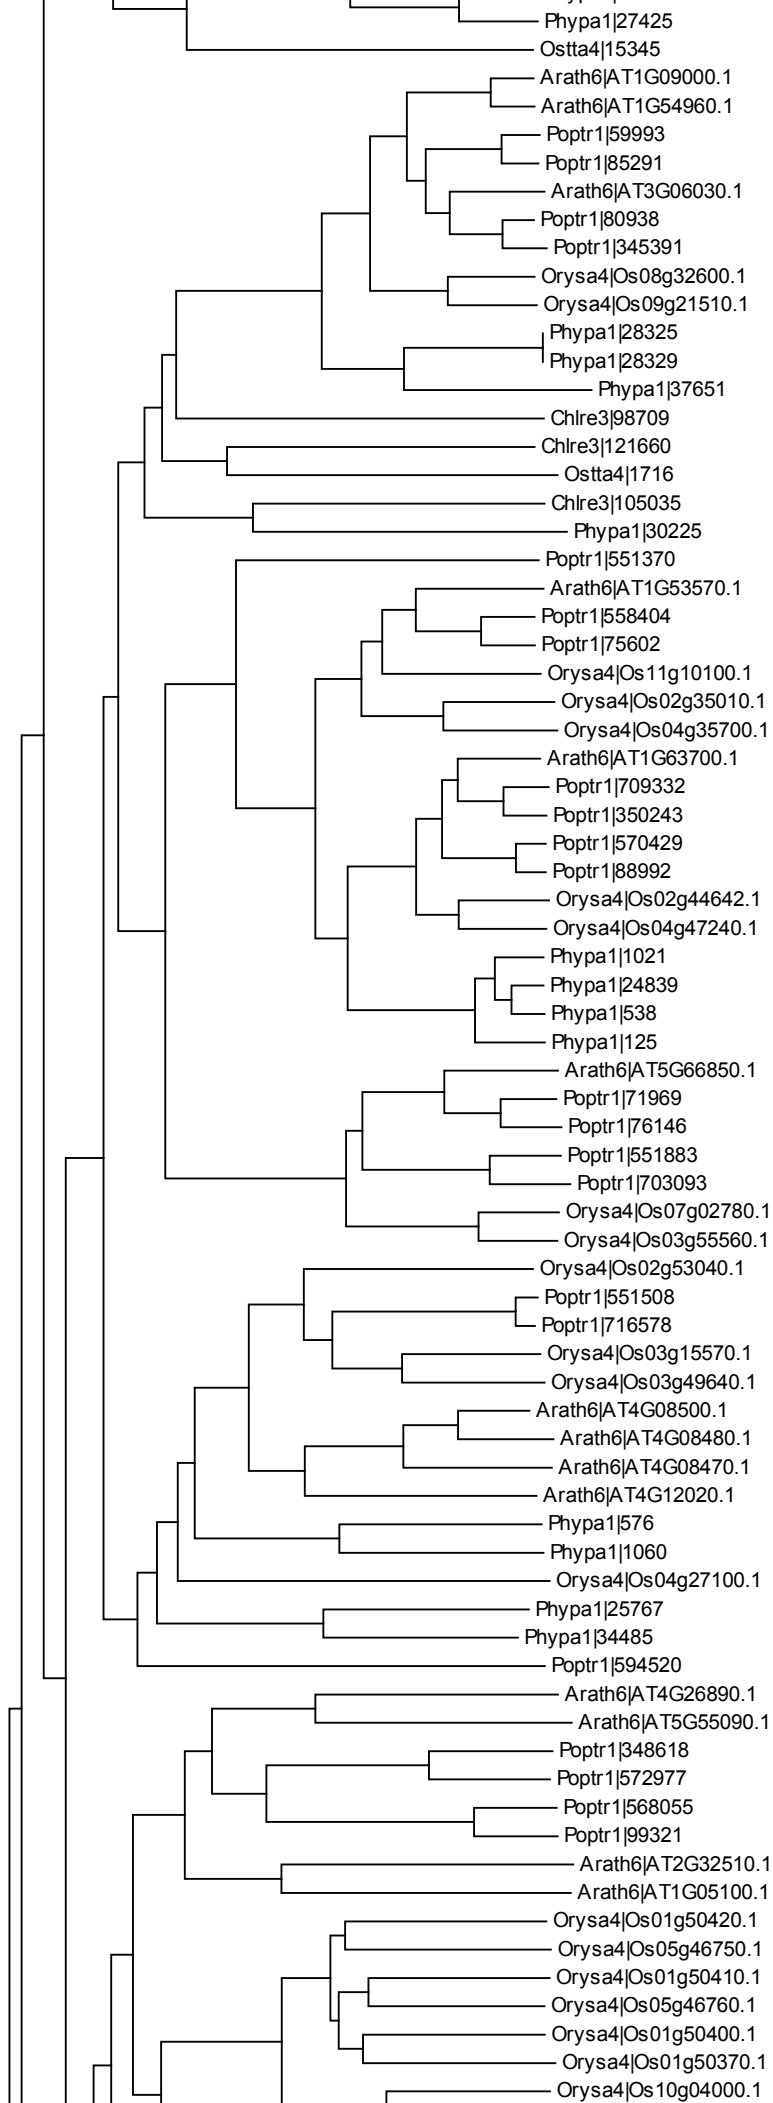

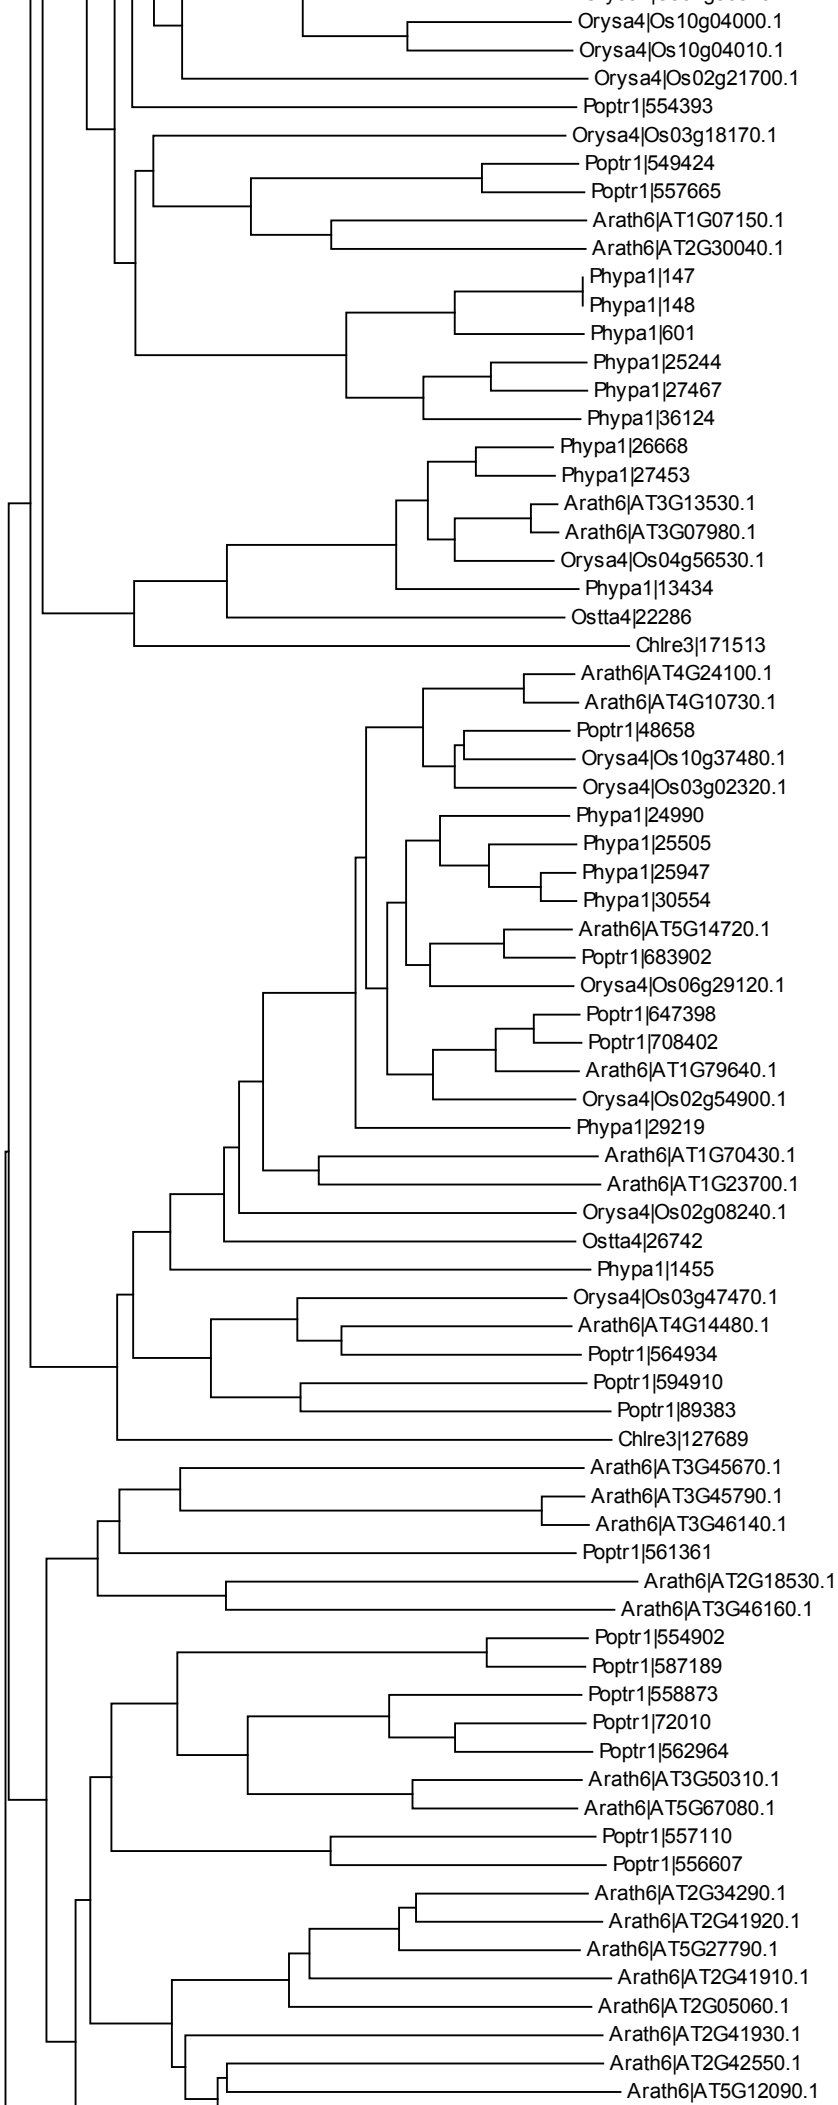

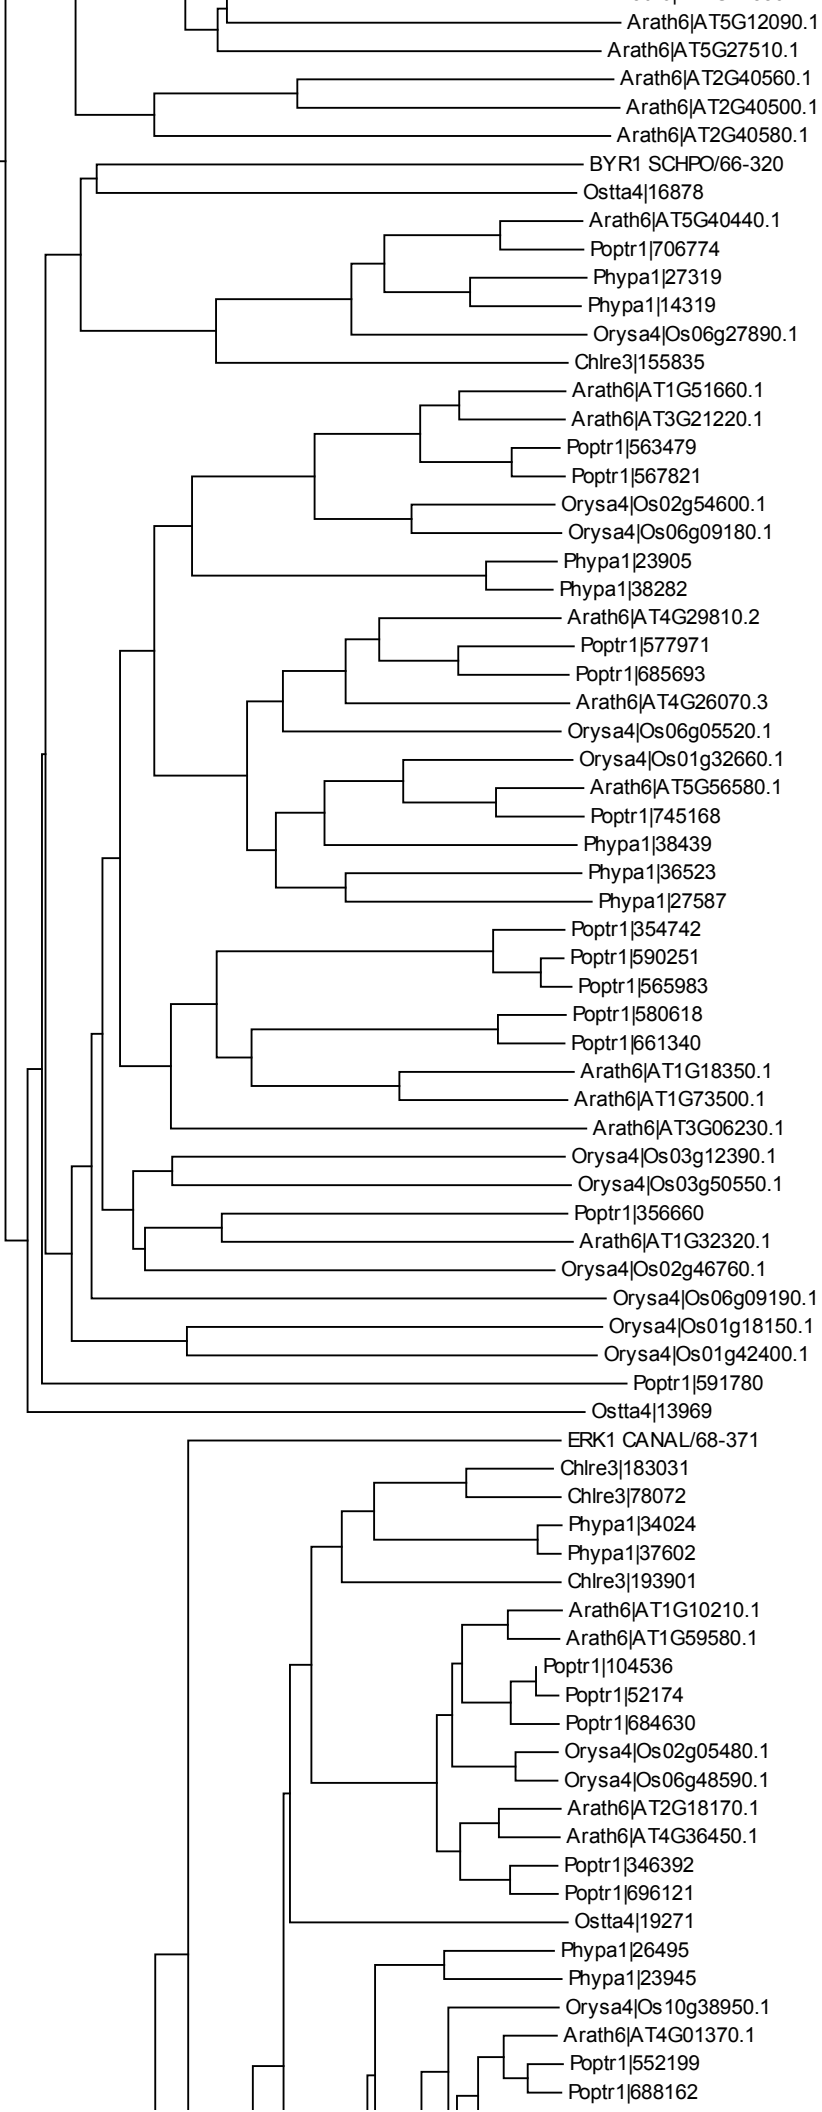

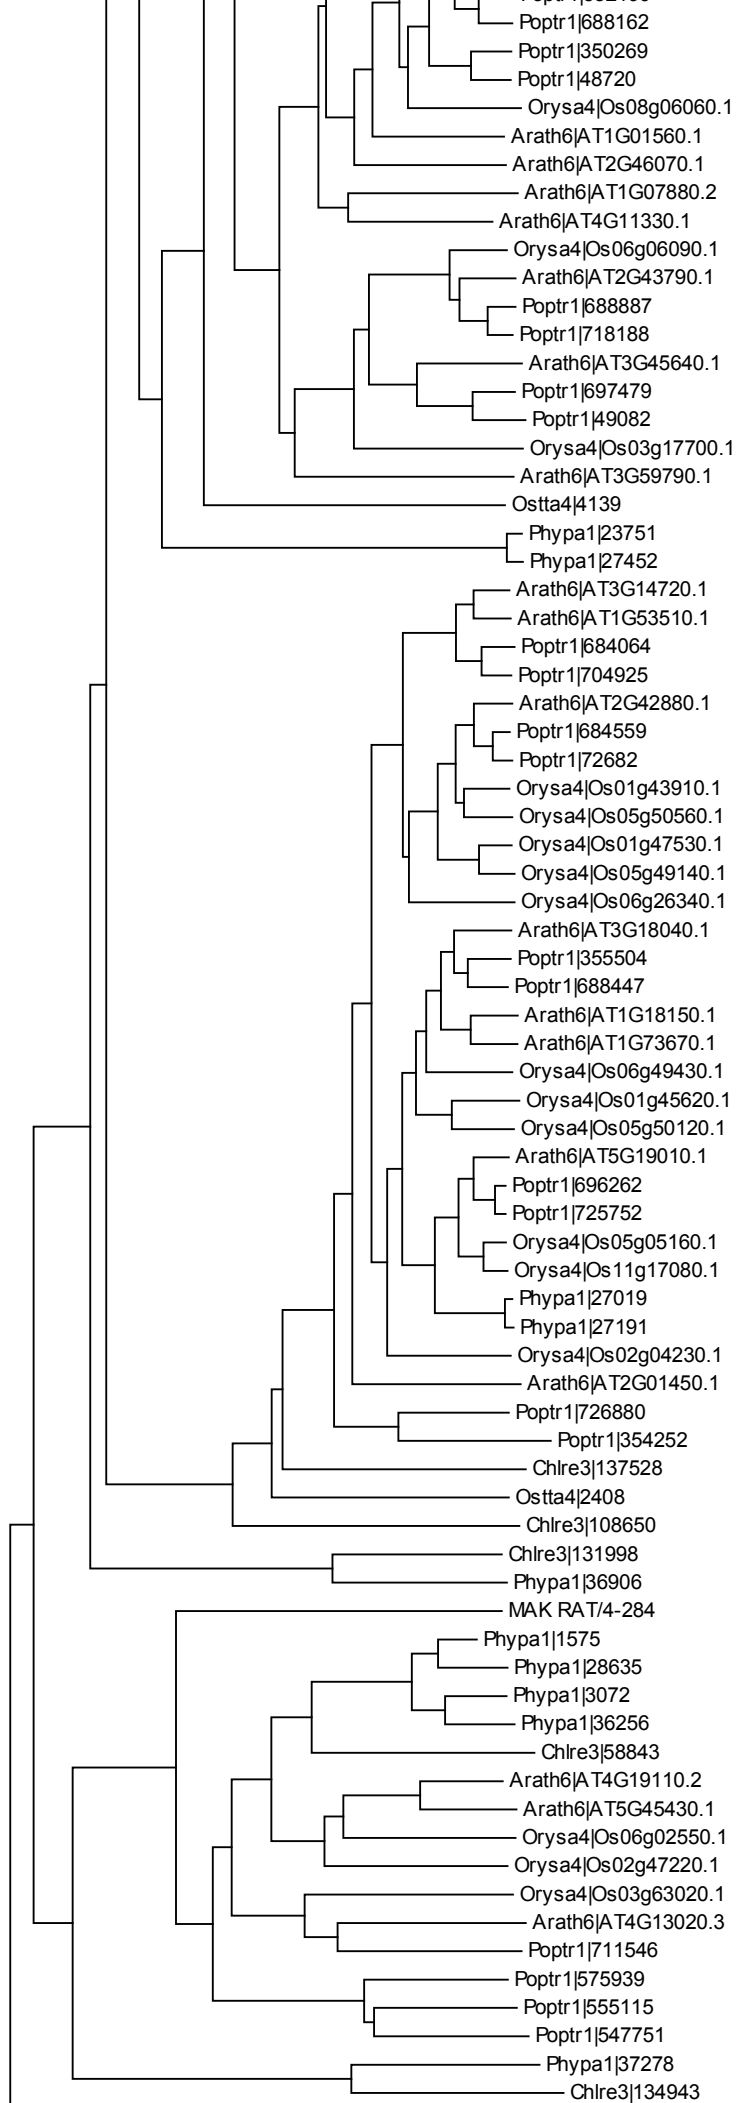

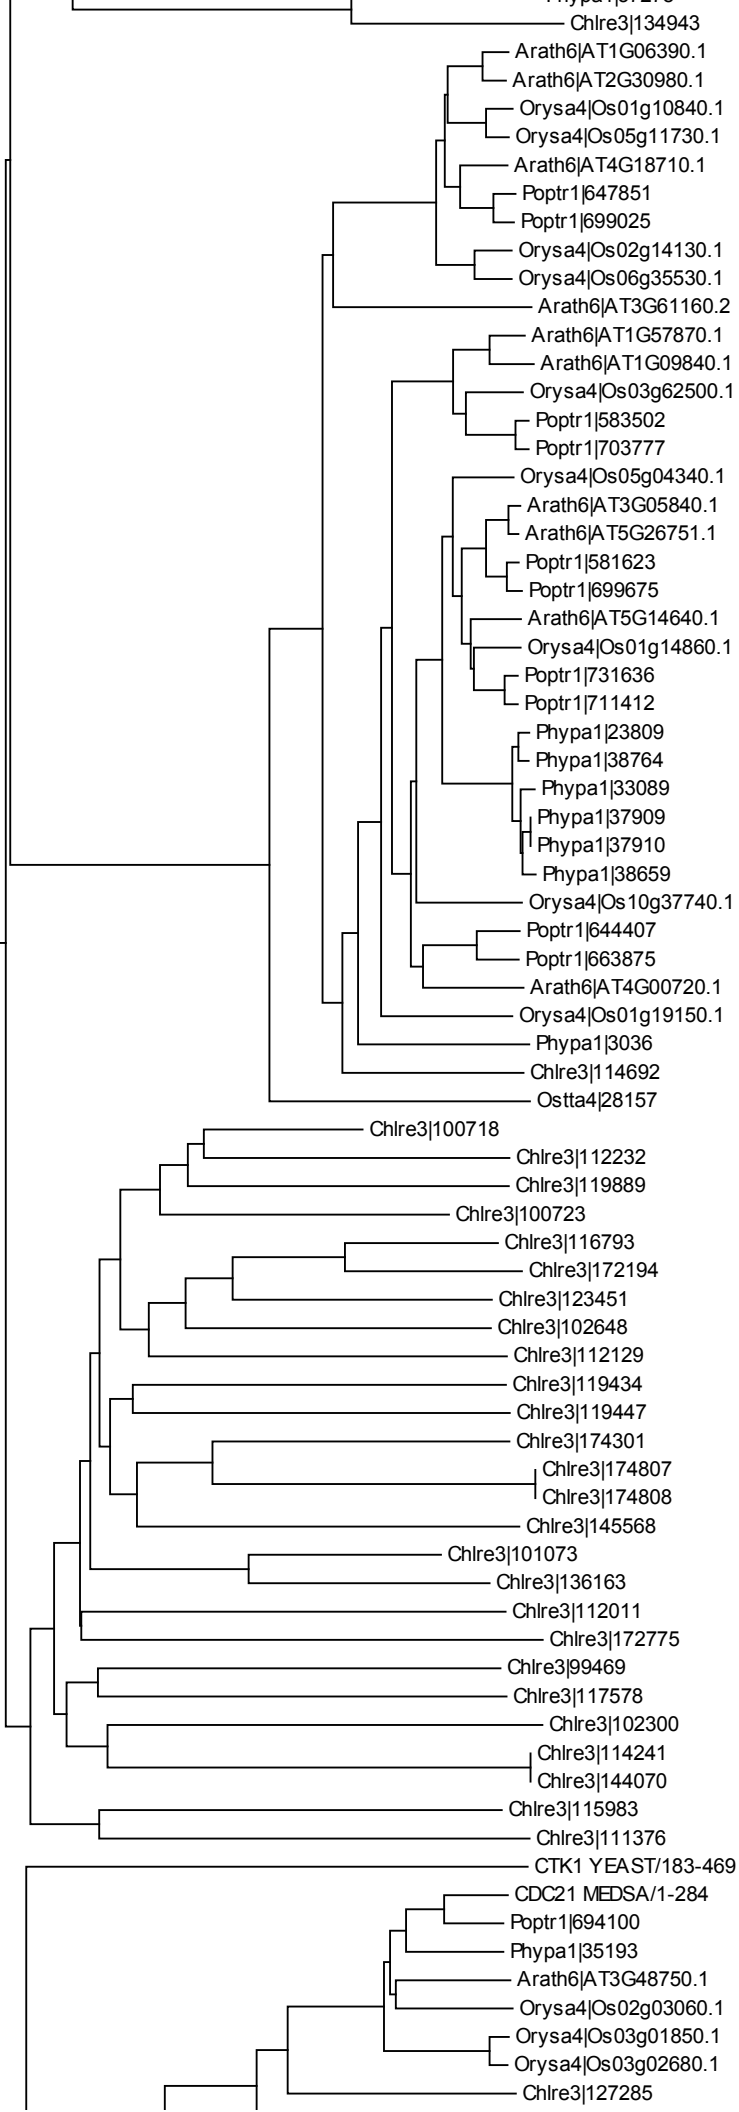

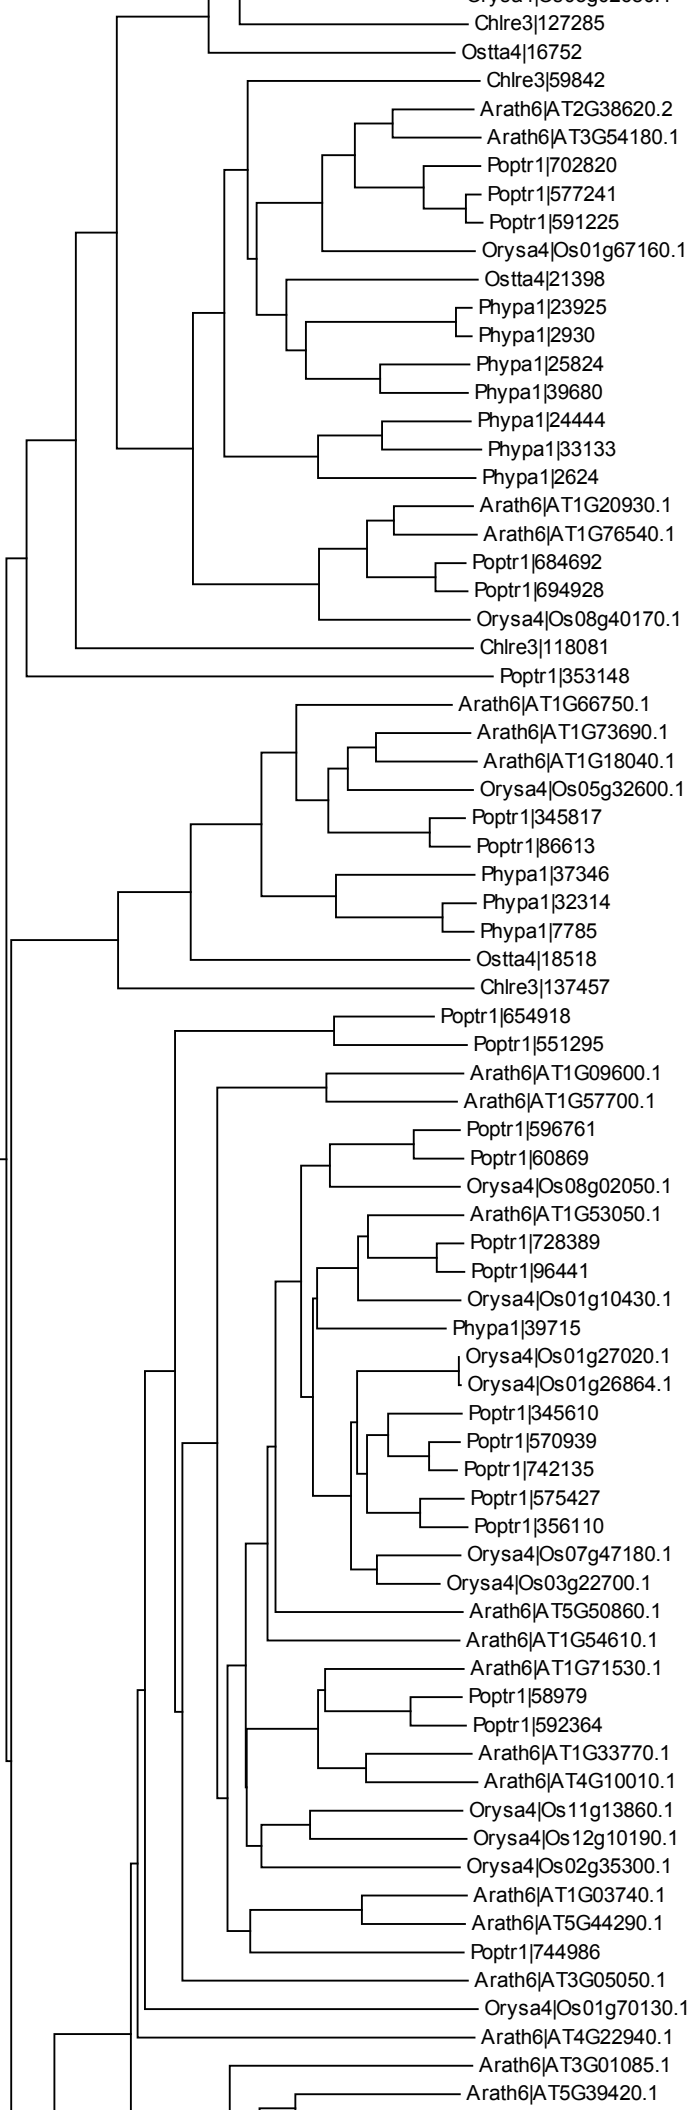

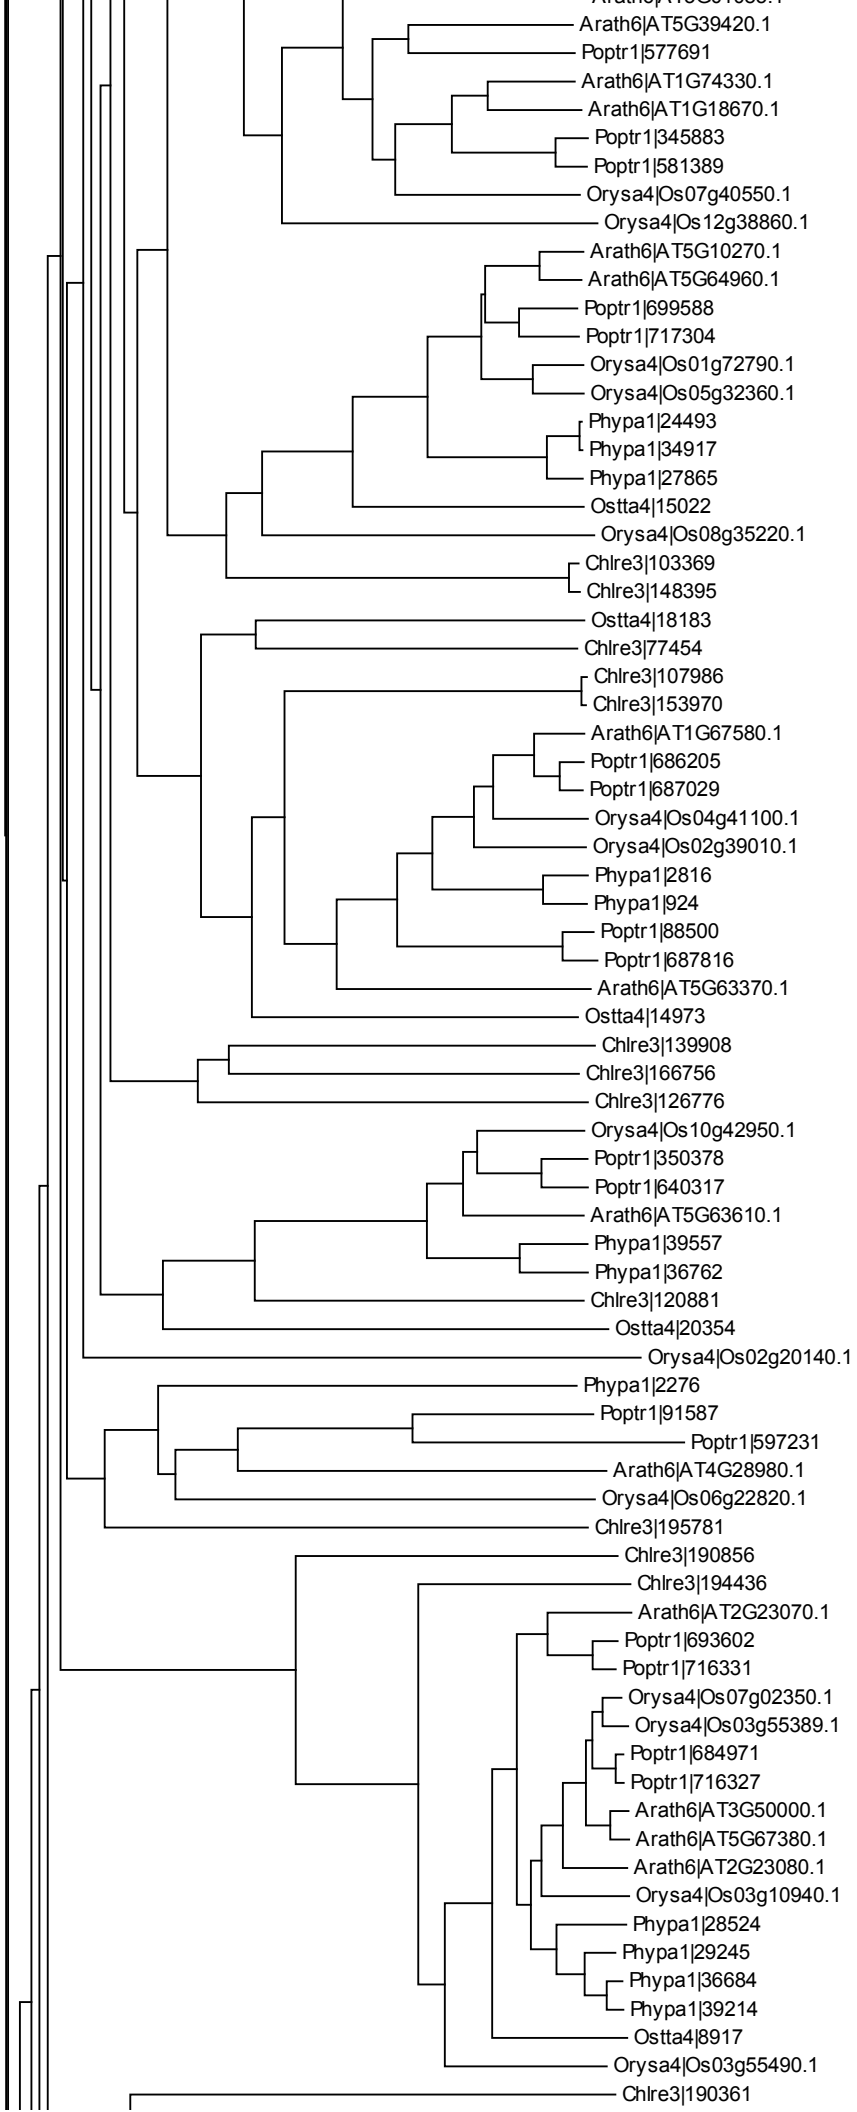

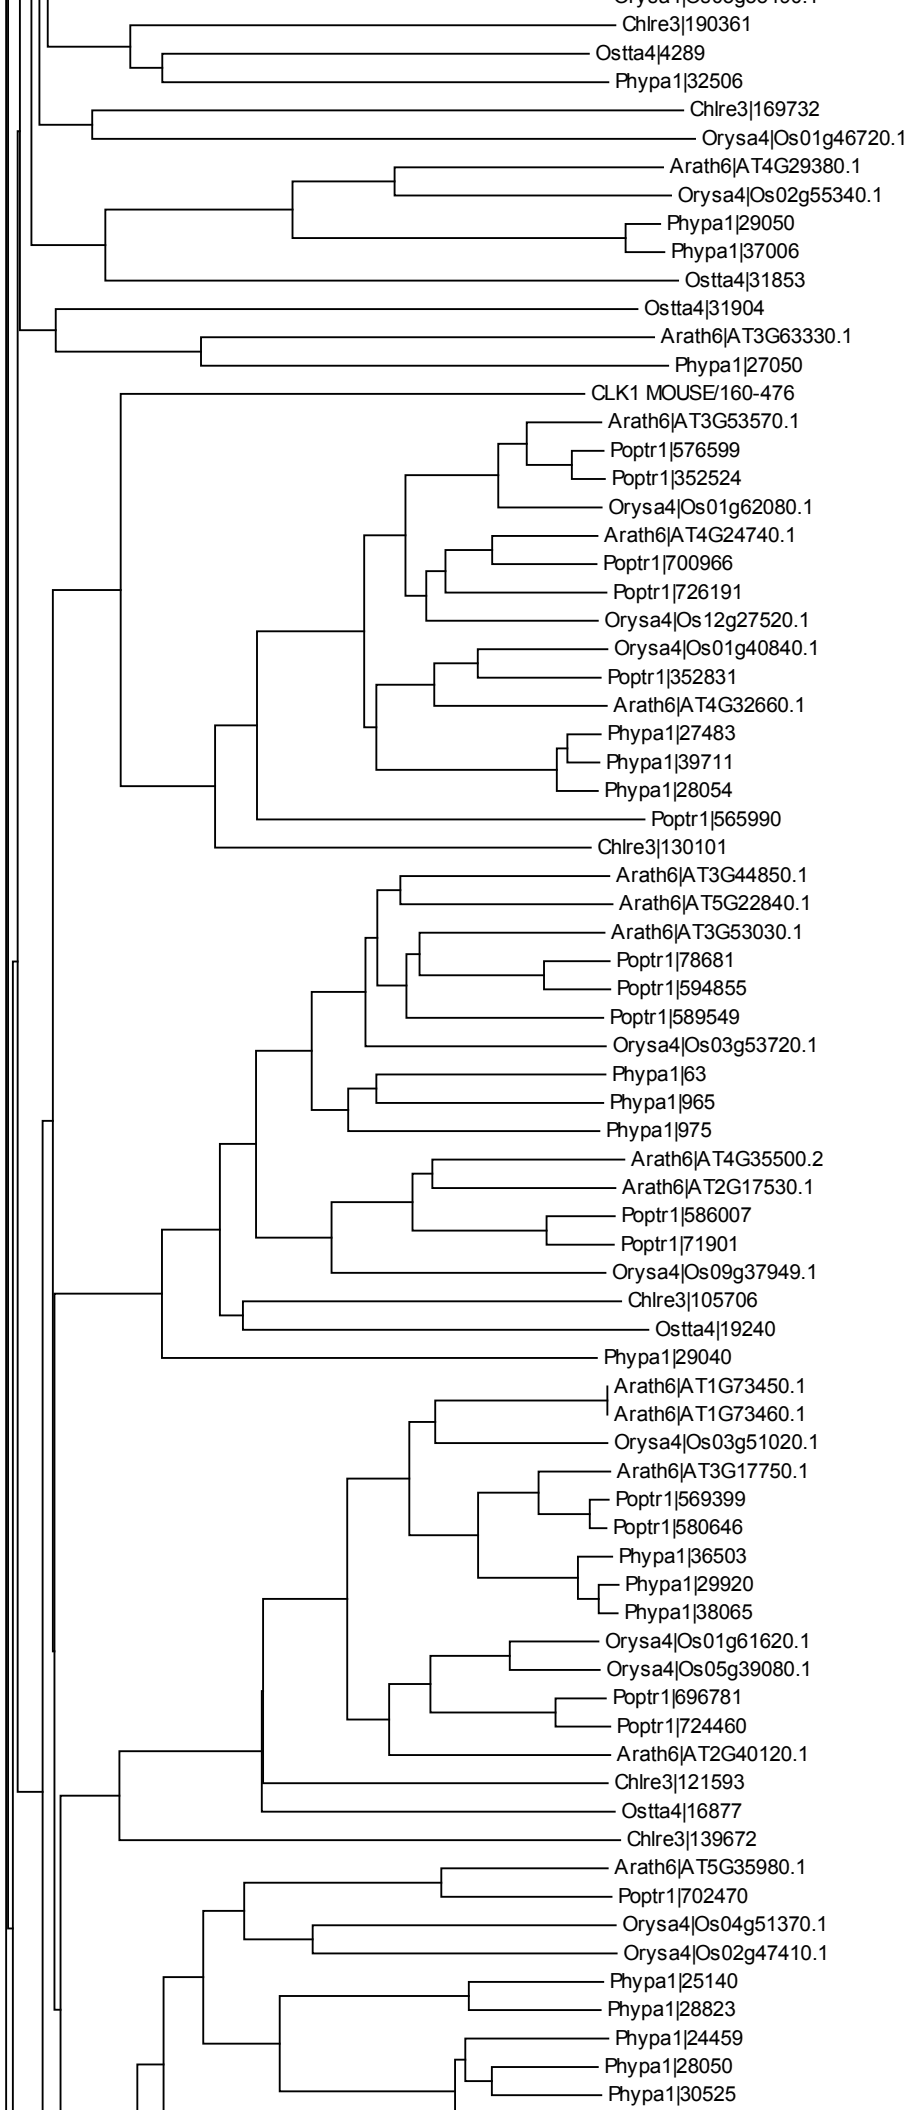



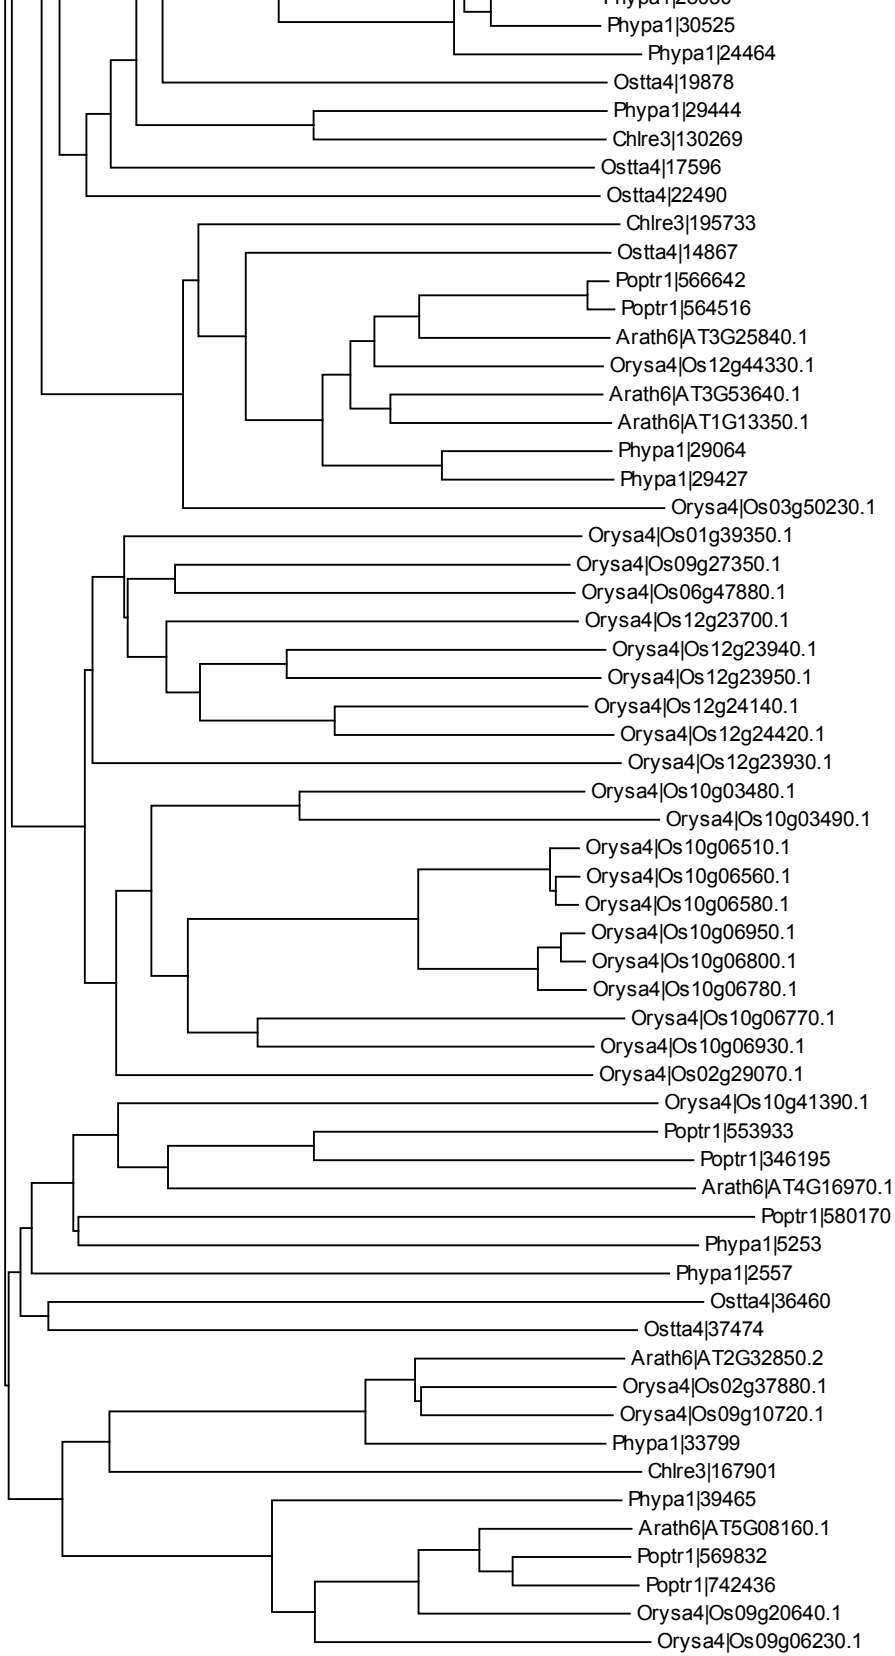

0.1
