# Supplementary material
Source: PubMed Central journal article supplement (PMC2675737)
Supplement: pp.108.134353_8.pdf [file pp.108.134353_8.pdf]

**Supplemental Table S2 RLK/Pelle genes that have gained new extracellular domains (ECDs)**

| Subfamily | Gene                                                             | Pfam domain gained in ECD |
|-----------|------------------------------------------------------------------|---------------------------|
| DUF26     | Os11g34624                                                       | LysM                      |
| L-LEC     | Os10g10540, Os12g41270,<br>Os12g41490, Os12g41510,<br>Os12g41530 | DUF26                     |
| L-LEC     | Os12g26940                                                       | CHASE                     |
| LRK10L-2  | At1g66980                                                        | GDPD                      |
| LRK10L-2  | At4g18250, At5g38280                                             | Thaumatin                 |
| LysM-II   | Poptr_574656                                                     | Lectin_legB               |
| RKF3      | Phypa_13                                                         | LRR_1                     |
| RLCK-XI   | Poptr_351213, Poptr_701405                                       | LRR_1                     |
| RLCK-XI   | Poptr_578788                                                     | Glyco_hydro_18            |
| SD1       | Os02g27310                                                       | SCP                       |
| SD1       | Poptr_578785                                                     | Glyco_hydro_18            |
| SD-2b     | Os01g02310, Os01g02340,<br>Poptr_544798                          | Thaumatin                 |

**Supplemental Table S3 Summary statistics for regression of subfamily stress responsiveness,  $F_s$ , (up-regulation) against the percentage of tandem subfamily members**

| Stress condition    | $\rho^a$ | p-value <sup>b</sup> |
|---------------------|----------|----------------------|
| <i>Abiotic</i>      |          |                      |
| Cold                | 0.224    | 0.339                |
| Heat                | -0.158   | 0.505                |
| Drought             | -0.427   | 0.062                |
| Salt                | -0.101   | 0.672                |
| Osmotic             | 0.544    | 0.014 <sup>c</sup>   |
| Wounding            | 0.513    | 0.022 <sup>c</sup>   |
| UV-B                | 0.744    | 2.50E-04             |
| <i>Biotic</i>       |          |                      |
| DC3000              | 0.338    | 0.144                |
| avrRpm1             | 0.502    | 0.025 <sup>c</sup>   |
| HrcC-               | 0.756    | 1.70E-04             |
| PspH                | 0.771    | 9.92E-05             |
| Flg22               | 0.770    | 1.05E-04             |
| HrpZ                | 0.788    | 4.99E-05             |
| GST-NPP1            | 0.779    | 7.38E-05             |
| <i>P. infestans</i> | 0.791    | 4.34E-05             |

<sup>a</sup>Spearman's rank correlation coefficient.

<sup>b</sup>P-values for the significance of the interaction determined using the Spearman's rank test for correlation.

<sup>c</sup>Not significant after sequential Bonferroni correction for multiple testing
